# Supplementary material for: Impact of COVID-19 vaccination on symptoms and immune phenotypes in vaccine-naïve individuals with Long COVID
Source: bioRxiv or medRxiv preprint supplement (doi:10.1101/2024.01.11.24300929), 2024-01-12
Supplement: Supplementary file [file media-2.pdf]

# Screening Questionnaire

Please complete the survey below to determine eligibility for the Yale COVID Recovery Study.

If you have any questions about the survey, please email [covidrecovery@yale.edu](mailto:covidrecovery@yale.edu).

Thank you for your interest!

---

Please enter your first name.

---

---

Please enter your last name.

---

---

Please provide an email address that we may use to contact you.

---

---

What is your birthdate?

---

---

What is a phone number that we may use to reach you?

---

---

Are you currently 18 years or older?

- Yes  
 No

---

Have you ever tested positive for COVID-19? (The type of test may have been PCR, antigen, antibody, or T-test.)

- Yes  
 No

---

Have you ever been hospitalized due to COVID-19?

- Yes  
 No

---

Have you ever been diagnosed with COVID-19 by a clinician?

- Yes  
 No

---

In your opinion, do you have symptoms more than 2 months after your initial COVID-19 infection (long covid) that interfere with your quality of life or with your ability to do your normal activities?

- Yes  
 No

---

Have you received any dose(s) of a COVID-19 vaccine?

- Yes  
 No

---

Do you plan to get the COVID-19 vaccine? (Note: You do not need to currently have a vaccine appointment to be planning to get the vaccine.)

- Yes  
 No

---

Are you willing to give a blood and saliva sample 3 times at your home on a Monday or Tuesday morning (before 1 pm)?

- Yes  
 No

---

Has consent been completed and verified?

- Yes  
 No

# Consent Verification

Please complete the survey below.

Thank you!

- 
- 15) Study Coordinator First Name \_\_\_\_\_

---

  - 16) Study Coordinator Last Name \_\_\_\_\_

---

  - 17) Participant First Name \_\_\_\_\_

---

  - 18) Participant Last Name \_\_\_\_\_

---

  - 19) Has the participant consented and has the consent been verified?  Yes  No

# Survey 1

Thank you for taking Survey 1 for the Yale COVID Recovery Study!

Please remember that you may stop this survey and come back to it at any point.

You may also find it helpful to have the below items ready as you complete the survey. If you do not have these items, please still fill in the information as best you can.

Testing results: dates, type (PCR, antigen) and result of tests. If you do not remember the exact date, the estimated date is enough. Symptom time and severity: your symptom log. You will be asked to pick symptoms you have had since you began having COVID-19 symptoms.

**There are 3 sections in this survey. In this section, we will ask for your contact information so that we may follow up with future research opportunities. We will also ask demographic questions so that we can understand how Long COVID is affecting the population.**

What is your birthdate?

\_\_\_\_\_

What is your zip code?

\_\_\_\_\_

Do you plan on getting the vaccine?

- Yes, and I have an appointment scheduled  
 Yes, but I don't have an appointment yet  
 I'm not planning on getting the vaccine  
 I have already gotten at least one dose of the COVID-19 vaccine

When is your vaccine appointment?

\_\_\_\_\_

What is your gender?

- Male  
 Female  
 Not listed \_\_\_\_\_

Please specify (optional):

\_\_\_\_\_

What race(s) or ethnicity do you consider yourself to be?

\*Please choose 1 or more

- American Indian/Alaska Native  
 Asian \_\_\_\_\_  
 Black or African American  
 Hispanic or Latino \_\_\_\_\_  
 Native Hawaiian/Other Pacific Islander \_\_\_\_\_  
 White  
 Some other race \_\_\_\_\_

Please specify your race and/or ethnicity

\_\_\_\_\_

Please specify (select as many as apply to you)

- Chinese  
 Filipino  
 Asian Indian  
 Vietnamese  
 Korean  
 Japanese  
 Other Asian (e.g., Pakistani, Cambodian, Hmong)

Please specify (select as many as apply to you):

- Native Hawaiian  
 Samoan  
 Chamorro  
 Other Pacific Islander (e.g., Tongan, Fijian, Marshallese)

Please specify (select as many as apply to you)

- Mexican/Mexican American  
 Puerto Rican  
 Dominican (Republic)  
 Cuban/Cuban American  
 Central or South American  
 Other Latino/Hispanic

Have you ever been told by a doctor that you have any of the following?

- Any allergies
- Arthritis (including rheumatoid arthritis, gout, lupus, or fibromyalgia)
- Asthma
- Blood disorder (including sickle cell disease or Thalassemia)
- Cancer or malignancy of any kind
- Cerebrovascular conditions affecting blood vessels to or in the brain (including stroke)
- Chronic lung disease (including emphysema, chronic bronchitis, chronic obstructive pulmonary disease (COPD), or pulmonary fibrosis)
- Cystic fibrosis
- Diabetes
- Gastrointestinal issues (including IBS or acid reflux)
- Heart attack, also called myocardial infarction
- Heart conditions (including coronary artery disease or cardiomyopathies)
- Heart failure
- High cholesterol
- History of organ transplant (including kidney, liver, heart, or lung)
- Hypertension or high blood pressure
- Immunocompromised state (including weakened immune system from blood or bone marrow transplant, immune deficiencies, HIV, use of corticosteroids, or use of other immune-weakening medicines)
- Kidney disease
- Liver disease
- Mental health conditions (including anxiety, depression, bipolar disorder, schizophrenia, obsessive or compulsive disorder)
- Neurologic conditions (including seizures or dementia)
- Spinal disorder(s)
- Other

Please describe "Other":

\_\_\_\_\_

**Now we are going to ask you questions about your experience with COVID-19. Please answer as best you can, and we understand that dates may not be exact. You have 2 survey sections to go.**

When did your symptoms due to COVID-19 begin?  
\_\_\_\_\_

Have you been tested for COVID-19 at least once?  Yes  
 No

What was the date of the first time you were tested for COVID-19?  
\_\_\_\_\_

What was the type of test?  PCR test  
 Antigen test  
 Not sure

What was the result?  Positive  
 Negative  
 Inconclusive  
 Awaiting result

Were you tested for COVID more than once?  Yes  
 No

How many times were you tested for COVID-19?  
\_\_\_\_\_

What was the date of your second COVID-19 test?  
\_\_\_\_\_

What was the result of your second test?  Positive  
 Negative  
 Inconclusive  
 Awaiting result

What was the date of your most recent COVID-19 test?  
\_\_\_\_\_

What was the result of your most recent COVID-19 test?  Positive  
 Negative  
 Inconclusive  
 Awaiting result

If you ever tested positive for COVID-19, when was your most recent positive test?  
\_\_\_\_\_

Do you believe that you were reinfected with COVID-19?  Yes  
 No

Were you ever hospitalized due to COVID-19?  Yes  
 No

Have you visited the hospital or been hospitalized for COVID-19 symptoms that began more than two weeks after you first got sick?  Yes  
 No

Which of the following symptoms have you experienced due to COVID-19? Select as many as apply. As a reminder, you stated that your symptoms began on [s1\_symptom\_date]. \*select all that apply

Symptoms

Have you experienced this symptom (at any time)?

Approximately when did you begin experiencing this symptom?

Does/did this symptom come and go?

Has this symptom gone away completely?

Abdominal pain

\_\_\_\_\_  
\_\_\_\_\_  
\_\_\_\_\_  
\_\_\_\_\_

Abnormally low temperature

\_\_\_\_\_  
\_\_\_\_\_  
\_\_\_\_\_  
\_\_\_\_\_

Acid reflux

\_\_\_\_\_  
\_\_\_\_\_  
\_\_\_\_\_  
\_\_\_\_\_

Afternoon or evening fevers/low-grade fevers

\_\_\_\_\_  
\_\_\_\_\_  
\_\_\_\_\_  
\_\_\_\_\_

Anemia (low number of red blood cells)

\_\_\_\_\_  
\_\_\_\_\_  
\_\_\_\_\_

Anxiety

---

---

---

---

Arrhythmia (improper beating of the heart due to electrical impulse problems)

---

---

---

---

Bilateral neck throbbing around lymph nodes

---

---

---

---

Blurry vision

---

---

---

---

Bone aches in extremities

---

---

---

---

Brain fog

---

---

---

---

Brain pressure

---



---

---

---

Bulging veins

---

---

---

---

Burning sensations

---

---

---

---

Bruising of skin

---

---

---

---

Calf cramps

---

---

---

---

Change in nails (i.e. white spots, brittleness, change in moons)

---

---

---

---

Changes in voice

---

---

---

\_\_\_\_\_

Changed sense of taste

\_\_\_\_\_

\_\_\_\_\_

\_\_\_\_\_

\_\_\_\_\_

Chills but no fever

\_\_\_\_\_

\_\_\_\_\_

\_\_\_\_\_

\_\_\_\_\_

Clogged ears

\_\_\_\_\_

\_\_\_\_\_

\_\_\_\_\_

\_\_\_\_\_

Cold burning feeling in lungs

\_\_\_\_\_

\_\_\_\_\_

\_\_\_\_\_

\_\_\_\_\_

Confusion

\_\_\_\_\_

\_\_\_\_\_

\_\_\_\_\_

\_\_\_\_\_

Congested or runny nose

\_\_\_\_\_

\_\_\_\_\_

\_\_\_\_\_

\_\_\_\_\_

Constant thirst

---

---

---

---

Costochondritis (inflammation of the cartilage that connects a rib to the breastbone)

---

---

---

---

Cough

---

---

---

---

Coughing up blood

---

---

---

---

Covid toes (tender or itchy rash or chilblains on the toes or foot)

---

---

---

---

Cracked or dry lips

---

---

---

---

Dental problems (i.e. chipped tooth, tooth loss)

---

---

---

\_\_\_\_\_

Diarrhea

\_\_\_\_\_

\_\_\_\_\_

\_\_\_\_\_

\_\_\_\_\_

Difficulty concentrating or focusing

\_\_\_\_\_

\_\_\_\_\_

\_\_\_\_\_

\_\_\_\_\_

Difficulty sleeping

\_\_\_\_\_

\_\_\_\_\_

\_\_\_\_\_

\_\_\_\_\_

Difficulty speaking properly

\_\_\_\_\_

\_\_\_\_\_

\_\_\_\_\_

\_\_\_\_\_

Discoloration of the skin (for example: purple or blue on the hands or feet, no blistering)

\_\_\_\_\_

\_\_\_\_\_

\_\_\_\_\_

\_\_\_\_\_

Dizziness

\_\_\_\_\_

\_\_\_\_\_

\_\_\_\_\_

\_\_\_\_\_

Dry eyes

---

---

---

---

Dry or peeling skin

---

---

---

---

Dry scalp or dandruff

---

---

---

---

Dry throat

---

---

---

---

Ear pain/earache

---

---

---

---

Elevated thyroid hormones

---

---

---

---

Extreme pressure at base of head or occipital nerve

---

---

\_\_\_\_\_

\_\_\_\_\_

Eye stye or infection

\_\_\_\_\_

\_\_\_\_\_

\_\_\_\_\_

\_\_\_\_\_

Fatigue

\_\_\_\_\_

\_\_\_\_\_

\_\_\_\_\_

\_\_\_\_\_

Feeling irritable

\_\_\_\_\_

\_\_\_\_\_

\_\_\_\_\_

\_\_\_\_\_

Feeling of burning skin

\_\_\_\_\_

\_\_\_\_\_

\_\_\_\_\_

\_\_\_\_\_

Fever or chills

\_\_\_\_\_

\_\_\_\_\_

\_\_\_\_\_

\_\_\_\_\_

Floaters or flashes of light in vision

\_\_\_\_\_

\_\_\_\_\_

\_\_\_\_\_

\_\_\_\_\_

Foot pain

---

---

---

---

GERD (acid reflux) with excessive salivation

---

---

---

---

Goiter or lump in throat

---

---

---

---

Hair loss

---

---

---

---

Hand or wrist pain

---

---

---

---

Headache

---

---

---

---

Heart palpitations (heart skipping a beat or racing)

---

---

\_\_\_\_\_

\_\_\_\_\_

Heat intolerance

\_\_\_\_\_

\_\_\_\_\_

\_\_\_\_\_

\_\_\_\_\_

High blood pressure

\_\_\_\_\_

\_\_\_\_\_

\_\_\_\_\_

\_\_\_\_\_

Hormone imbalances

\_\_\_\_\_

\_\_\_\_\_

\_\_\_\_\_

\_\_\_\_\_

“Hot” blood rush

\_\_\_\_\_

\_\_\_\_\_

\_\_\_\_\_

\_\_\_\_\_

Inability to cry

\_\_\_\_\_

\_\_\_\_\_

\_\_\_\_\_

\_\_\_\_\_

Inability to exercise or be active

\_\_\_\_\_

\_\_\_\_\_

\_\_\_\_\_

\_\_\_\_\_



Inability to yawn

---

---

---

---

Internal tremors or buzzing/vibration

---

---

---

---

Irregular or skipped menstrual cycles

---

---

---

---

Jaw pain

---

---

---

---

Joint pain

---

---

---

---

Kidney issues or protein in urine

---

---

---

---

Kidney pain

---

---

---

---

Low blood oxygen

---

---

---

---

Low blood pressure

---

---

---

---

Lower back pain

---

---

---

---

Loss of appetite

---

---

---

---

Loss of hearing

---

---

---

---

Loss or decrease in quality of vision

---

---

---

---

Lump in throat/difficulty swallowing

\_\_\_\_\_

\_\_\_\_\_

\_\_\_\_\_

\_\_\_\_\_

Memory problems

\_\_\_\_\_

\_\_\_\_\_

\_\_\_\_\_

\_\_\_\_\_

Menstrual cycles that are heavier or lighter than normal

\_\_\_\_\_

\_\_\_\_\_

\_\_\_\_\_

\_\_\_\_\_

Mid-back pain at base of ribs

\_\_\_\_\_

\_\_\_\_\_

\_\_\_\_\_

\_\_\_\_\_

Mouth sores or sore tongue

\_\_\_\_\_

\_\_\_\_\_

\_\_\_\_\_

\_\_\_\_\_

Muscle or body aches

\_\_\_\_\_

\_\_\_\_\_

\_\_\_\_\_

\_\_\_\_\_

Muscle twitching

\_\_\_\_\_

---

---

---

Nausea or vomiting

---

---

---

---

Neck muscle pain

---

---

---

---

Nerve pain

---

---

---

---

Nerve sensations (tingling, pins and needles, numbness)

---

---

---

---

Neuropathy in feet and hands (weakness, numbness, and pain)

---

---

---

---

New allergies

---

---

---

\_\_\_\_\_

Night sweats

\_\_\_\_\_

\_\_\_\_\_

\_\_\_\_\_

\_\_\_\_\_

Nightmares

\_\_\_\_\_

\_\_\_\_\_

\_\_\_\_\_

\_\_\_\_\_

Painful scalp

\_\_\_\_\_

\_\_\_\_\_

\_\_\_\_\_

\_\_\_\_\_

Partial or complete loss of sense of smell

\_\_\_\_\_

\_\_\_\_\_

\_\_\_\_\_

\_\_\_\_\_

Partial or complete loss of sense of taste

\_\_\_\_\_

\_\_\_\_\_

\_\_\_\_\_

\_\_\_\_\_

Persistent chest pain or pressure

\_\_\_\_\_

\_\_\_\_\_

\_\_\_\_\_

\_\_\_\_\_

Personality change (drastic)

---

---

---

---

Petechiae (pinpoint rash)

---

---

---

---

Phantom smells

---

---

---

---

Phlegm in back of throat

---

---

---

---

Post-exertional malaise (worsened symptoms or flu-like symptoms after exertion)

---

---

---

---

Postnasal drip

---

---

---

---

Rash

---

---

---

\_\_\_\_\_

Reflux or heartburn

\_\_\_\_\_

\_\_\_\_\_

\_\_\_\_\_

\_\_\_\_\_

Runny nose

\_\_\_\_\_

\_\_\_\_\_

\_\_\_\_\_

\_\_\_\_\_

Sadness

\_\_\_\_\_

\_\_\_\_\_

\_\_\_\_\_

\_\_\_\_\_

Seizures

\_\_\_\_\_

\_\_\_\_\_

\_\_\_\_\_

\_\_\_\_\_

Sharp or sudden chest pain

\_\_\_\_\_

\_\_\_\_\_

\_\_\_\_\_

\_\_\_\_\_

Shortness of breath or difficulty breathing

\_\_\_\_\_

\_\_\_\_\_

\_\_\_\_\_

\_\_\_\_\_

Shortness of breath or exhaustion from bending over

---

---

---

---

Sleeping more than normal

---

---

---

---

Sore throat

---

---

---

---

Spinal issues

---

---

---

---

Spikes in blood pressure

---

---

---

---

Swollen hands or feet

---

---

---

---

Swollen lymph nodes

---

---



\_\_\_\_\_

\_\_\_\_\_

Syncope (fainting)

\_\_\_\_\_

\_\_\_\_\_

\_\_\_\_\_

\_\_\_\_\_

Tachycardia (rapid heartbeat) at rest

\_\_\_\_\_

\_\_\_\_\_

\_\_\_\_\_

\_\_\_\_\_

Tachycardia (rapid heartbeat) after standing up

\_\_\_\_\_

\_\_\_\_\_

\_\_\_\_\_

\_\_\_\_\_

Thrush (white fungal infection in the mouth or throat)

\_\_\_\_\_

\_\_\_\_\_

\_\_\_\_\_

\_\_\_\_\_

Tinnitus or humming in ears

\_\_\_\_\_

\_\_\_\_\_

\_\_\_\_\_

\_\_\_\_\_

Tremors or shakiness

\_\_\_\_\_

\_\_\_\_\_

\_\_\_\_\_

\_\_\_\_\_

Upper back pain

\_\_\_\_\_  
\_\_\_\_\_  
\_\_\_\_\_  
\_\_\_\_\_

UTI (urinary tract infection)

\_\_\_\_\_  
\_\_\_\_\_  
\_\_\_\_\_  
\_\_\_\_\_

Weakened neck

\_\_\_\_\_  
\_\_\_\_\_  
\_\_\_\_\_  
\_\_\_\_\_

Weight gain

\_\_\_\_\_  
\_\_\_\_\_  
\_\_\_\_\_  
\_\_\_\_\_

Other symptom(s)

\_\_\_\_\_

---

Please specify "Other symptoms"

\_\_\_\_\_

---

Have you experienced this symptom (at any time)?

Yes

---

When did the symptom begin?

\_\_\_\_\_

---

Does/Did this symptom come and go?

Yes  
 No

---

Has the symptom gone away completely?

Yes  
 No

---

Have you experienced this symptom (at any time)?

Yes

---

When did the symptom begin?

---

---

Does/Did this symptom come and go?

- Yes  
 No

---

Has the symptom gone away completely?

- Yes  
 No

---

Have you experienced this symptom (at any time)?

- Yes

---

When did the symptom begin?

---

---

Does/Did this symptom come and go?

- Yes  
 No

---

Has the symptom gone away completely?

- Yes  
 No

---

Have you experienced this symptom (at any time)?

- Yes

---

When did the symptom begin?

---

---

Does/Did this symptom come and go?

- Yes  
 No

---

Has the symptom gone away completely?

- Yes  
 No

---

Have you experienced this symptom (at any time)?

- Yes

---

When did the symptom begin?

---

---

Does/Did this symptom come and go?

- Yes  
 No

---

Has the symptom gone away completely?

- Yes  
 No

---

Have you experienced this symptom (at any time)?

- Yes

---

When did the symptom begin?

---

---

Does/Did this symptom come and go?

- Yes  
 No

---

Has the symptom gone away completely?

- Yes  
 No

---

Have you experienced this symptom (at any time)?

- Yes

---

When did the symptom begin?

---

---

Does/Did this symptom come and go?

- Yes  
 No

---

Has the symptom gone away completely?

- Yes  
 No

---

Have you experienced this symptom (at any time)?

- Yes

---

When did the symptom begin?

---

---

Does/Did this symptom come and go?

- Yes  
 No

---

Has the symptom gone away completely?

- Yes  
 No

---

Have you experienced this symptom (at any time)?

- Yes

---

When did the symptom begin?

---

---

Does/Did this symptom come and go?

- Yes  
 No

---

Has the symptom gone away completely?

- Yes  
 No

---

Have you experienced this symptom (at any time)?

- Yes

---

When did the symptom begin?

---

---

Does/Did this symptom come and go?

- Yes  
 No

---

Has the symptom gone away completely?

- Yes  
 No

---

Have you experienced this symptom (at any time)?

- Yes

---

When did the symptom begin?

---

---

Does/Did this symptom come and go?

- Yes  
 No

---

Has the symptom gone away completely?

- Yes  
 No

---

Have you experienced this symptom (at any time)?

- Yes

---

When did the symptom begin?

---

---

Does/Did this symptom come and go?

- Yes  
 No

---

Has the symptom gone away completely?

- Yes  
 No

---

Have you experienced this symptom (at any time)?

- Yes

---

When did the symptom begin?

---

---

Does/Did this symptom come and go?

- Yes  
 No

---

Has the symptom gone away completely?

- Yes  
 No

---

Have you experienced this symptom (at any time)?

- Yes

---

When did the symptom begin?

---

---

Does/Did this symptom come and go?

- Yes  
 No

---

Has the symptom gone away completely?

- Yes  
 No

---

Have you experienced this symptom (at any time)?

- Yes

---

When did the symptom begin?

---

---

Does/Did this symptom come and go?

- Yes  
 No

---

Has the symptom gone away completely?

- Yes  
 No

---

Have you experienced this symptom (at any time)?

- Yes

---

When did the symptom begin?

---

---

Does/Did this symptom come and go?

- Yes  
 No

---

Has the symptom gone away completely?

- Yes  
 No

---

Have you experienced this symptom (at any time)?

- Yes

---

When did the symptom begin?

---

---

Does/Did this symptom come and go?

- Yes  
 No

---

Has the symptom gone away completely?

- Yes  
 No

---

Have you experienced this symptom (at any time)?

- Yes

---

When did the symptom begin?

---

---

Does/Did this symptom come and go?

- Yes  
 No

---

Has the symptom gone away completely?

- Yes  
 No

---

Have you experienced this symptom (at any time)?

- Yes

---

When did the symptom begin?

---

---

Does/Did this symptom come and go?

- Yes  
 No

---

Has the symptom gone away completely?

- Yes  
 No

---

Have you experienced this symptom (at any time)?

- Yes

---

When did the symptom begin?

---

---

Does/Did this symptom come and go?

- Yes  
 No

---

Has the symptom gone away completely?

- Yes  
 No

---

Have you experienced this symptom (at any time)?

- Yes

---

When did the symptom begin?

---

---

Does/Did this symptom come and go?

- Yes  
 No

---

Has the symptom gone away completely?

- Yes  
 No

---

Have you experienced this symptom (at any time)?

- Yes

---

When did the symptom begin?

---

---

Does/Did this symptom come and go?

- Yes  
 No

---

Has the symptom gone away completely?

- Yes  
 No

---

Have you experienced this symptom (at any time)?

- Yes

---

When did the symptom begin?

---

---

Does/Did this symptom come and go?

- Yes  
 No

---

Has the symptom gone away completely?

- Yes  
 No

---

Have you experienced this symptom (at any time)?

- Yes

---

When did the symptom begin?

---

---

Does/Did this symptom come and go?

- Yes  
 No

---

Has the symptom gone away completely?

- Yes  
 No

---

Have you experienced this symptom (at any time)?

- Yes

---

When did the symptom begin?

---

---

Does/Did this symptom come and go?

- Yes  
 No

---

Has the symptom gone away completely?

- Yes  
 No

---

Have you experienced this symptom (at any time)?

- Yes

---

When did the symptom begin?

---

---

Does/Did this symptom come and go?

- Yes  
 No

---

Has the symptom gone away completely?

- Yes  
 No

---

Have you experienced this symptom (at any time)?

- Yes

---

When did the symptom begin?

\_\_\_\_\_

---

Does/Did this symptom come and go?

- Yes
- No

---

Has the symptom gone away completely?

- Yes
- No

---

Have you experienced this symptom (at any time)?

- Yes

---

When did the symptom begin?

\_\_\_\_\_

---

Does/Did this symptom come and go?

- Yes
- No

---

Has the symptom gone away completely?

- Yes
- No

---

Have you experienced this symptom (at any time)?

- Yes

---

When did the symptom begin?

\_\_\_\_\_

---

Does/Did this symptom come and go?

- Yes
- No

---

Has the symptom gone away completely?

- Yes
- No

---

Have you experienced this symptom (at any time)?

- Yes

---

When did the symptom begin?

\_\_\_\_\_

---

Does/Did this symptom come and go?

- Yes
- No

---

Has the symptom gone away completely?

- Yes
- No

---

Have you experienced this symptom (at any time)?

- Yes

---

When did the symptom begin?

\_\_\_\_\_

---

Does/Did this symptom come and go?

- Yes
- No

---

Has the symptom gone away completely?

- Yes
- No

---

Have you experienced this symptom (at any time)?

- Yes



---

When did the symptom begin?

---

---

Does/Did this symptom come and go?

- Yes  
 No

---

Has the symptom gone away completely?

- Yes  
 No

---

Have you experienced this symptom (at any time)?

- Yes

---

When did the symptom begin?

---

---

Does/Did this symptom come and go?

- Yes  
 No

---

Has the symptom gone away completely?

- Yes  
 No

---

Have you experienced this symptom (at any time)?

- Yes

---

When did the symptom begin?

---

---

Does/Did this symptom come and go?

- Yes  
 No

---

Has the symptom gone away completely?

- Yes  
 No

---

Have you experienced this symptom (at any time)?

- Yes

---

When did the symptom begin?

---

---

Does/Did this symptom come and go?

- Yes  
 No

---

Has the symptom gone away completely?

- Yes  
 No

---

Have you experienced this symptom (at any time)?

- Yes

---

When did the symptom begin?

---

---

Does/Did this symptom come and go?

- Yes  
 No

---

Has the symptom gone away completely?

- Yes  
 No

---

Have you experienced this symptom (at any time)?

- Yes

---

When did the symptom begin?

\_\_\_\_\_

---

Does/Did this symptom come and go?

- Yes
- No

---

Has the symptom gone away completely?

- Yes
- No

---

Have you experienced this symptom (at any time)?

- Yes

---

When did the symptom begin?

\_\_\_\_\_

---

Does/Did this symptom come and go?

- Yes
- No

---

Has the symptom gone away completely?

- Yes
- No

---

Have you experienced this symptom (at any time)?

- Yes

---

When did the symptom begin?

\_\_\_\_\_

---

Does/Did this symptom come and go?

- Yes
- No

---

Has the symptom gone away completely?

- Yes
- No

---

Have you experienced this symptom (at any time)?

- Yes

---

When did the symptom begin?

\_\_\_\_\_

---

Does/Did this symptom come and go?

- Yes
- No

---

Has the symptom gone away completely?

- Yes
- No

---

Have you experienced this symptom (at any time)?

- Yes

---

When did the symptom begin?

\_\_\_\_\_

---

Does/Did this symptom come and go?

- Yes
- No

---

Has the symptom gone away completely?

- Yes
- No

---

Have you experienced this symptom (at any time)?

- Yes

---

When did the symptom begin?

\_\_\_\_\_

---

Does/Did this symptom come and go?

- Yes
- No

---

Has the symptom gone away completely?

- Yes
- No

---

Have you experienced this symptom (at any time)?

- Yes

---

When did the symptom begin?

\_\_\_\_\_

---

Does/Did this symptom come and go?

- Yes
- No

---

Has the symptom gone away completely?

- Yes
- No

---

Have you experienced this symptom (at any time)?

- Yes

---

When did the symptom begin?

\_\_\_\_\_

---

Does/Did this symptom come and go?

- Yes
- No

---

Has the symptom gone away completely?

- Yes
- No

---

Have you experienced this symptom (at any time)?

- Yes

---

When did the symptom begin?

\_\_\_\_\_

---

Does/Did this symptom come and go?

- Yes
- No

---

Has the symptom gone away completely?

- Yes
- No

---

Have you experienced this symptom (at any time)?

- Yes

---

When did the symptom begin?

\_\_\_\_\_

---

Does/Did this symptom come and go?

- Yes
- No

---

Has the symptom gone away completely?

- Yes
- No

---

Have you experienced this symptom (at any time)?

- Yes

---

When did the symptom begin?

---

---

Does/Did this symptom come and go?

- Yes  
 No

---

Has the symptom gone away completely?

- Yes  
 No

---

Have you experienced this symptom (at any time)?

- Yes

---

When did the symptom begin?

---

---

Does/Did this symptom come and go?

- Yes  
 No

---

Has the symptom gone away completely?

- Yes  
 No

---

Have you experienced this symptom (at any time)?

- Yes

---

When did the symptom begin?

---

---

Does/Did this symptom come and go?

- Yes  
 No

---

Has the symptom gone away completely?

- Yes  
 No

---

Have you experienced this symptom (at any time)?

- Yes

---

When did the symptom begin?

---

---

Does/Did this symptom come and go?

- Yes  
 No

---

Has the symptom gone away completely?

- Yes  
 No

---

Have you experienced this symptom (at any time)?

- Yes

---

When did the symptom begin?

---

---

Does/Did this symptom come and go?

- Yes  
 No

---

Has the symptom gone away completely?

- Yes  
 No

---

Have you experienced this symptom (at any time)?

- Yes

---

When did the symptom begin?

---

---

Does/Did this symptom come and go?

- Yes  
 No

---

Has the symptom gone away completely?

- Yes  
 No

---

Have you experienced this symptom (at any time)?

- Yes

---

When did the symptom begin?

---

---

Does/Did this symptom come and go?

- Yes  
 No

---

Has the symptom gone away completely?

- Yes  
 No

---

Have you experienced this symptom (at any time)?

- Yes

---

When did the symptom begin?

---

---

Does/Did this symptom come and go?

- Yes  
 No

---

Has the symptom gone away completely?

- Yes  
 No

---

Have you experienced this symptom (at any time)?

- Yes

---

When did the symptom begin?

---

---

Does/Did this symptom come and go?

- Yes  
 No

---

Has the symptom gone away completely?

- Yes  
 No

---

Have you experienced this symptom (at any time)?

- Yes

---

When did the symptom begin?

---

---

Does/Did this symptom come and go?

- Yes  
 No

---

Has the symptom gone away completely?

- Yes  
 No

---

Have you experienced this symptom (at any time)?

- Yes

---

When did the symptom begin?

---

---

Does/Did this symptom come and go?

- Yes  
 No

---

Has the symptom gone away completely?

- Yes  
 No

---

Have you experienced this symptom (at any time)?

- Yes

---

When did the symptom begin?

---

---

Does/Did this symptom come and go?

- Yes  
 No

---

Has the symptom gone away completely?

- Yes  
 No

---

Have you experienced this symptom (at any time)?

- Yes

---

When did the symptom begin?

---

---

Does/Did this symptom come and go?

- Yes  
 No

---

Has the symptom gone away completely?

- Yes  
 No

---

Have you experienced this symptom (at any time)?

- Yes

---

When did the symptom begin?

---

---

Does/Did this symptom come and go?

- Yes  
 No

---

Has the symptom gone away completely?

- Yes  
 No

---

Have you experienced this symptom (at any time)?

- Yes

---

When did the symptom begin?

---

---

Does/Did this symptom come and go?

- Yes  
 No

---

Has the symptom gone away completely?

- Yes  
 No

---

Have you experienced this symptom (at any time)?

- Yes

---

When did the symptom begin?

\_\_\_\_\_

---

Does/Did this symptom come and go?

- Yes
- No

---

Has the symptom gone away completely?

- Yes
- No

---

Have you experienced this symptom (at any time)?

- Yes

---

When did the symptom begin?

\_\_\_\_\_

---

Does/Did this symptom come and go?

- Yes
- No

---

Has the symptom gone away completely?

- Yes
- No

---

Have you experienced this symptom (at any time)?

- Yes

---

When did the symptom begin?

\_\_\_\_\_

---

Does/Did this symptom come and go?

- Yes
- No

---

Has the symptom gone away completely?

- Yes
- No

---

Have you experienced this symptom (at any time)?

- Yes

---

When did the symptom begin?

\_\_\_\_\_

---

Does/Did this symptom come and go?

- Yes
- No

---

Has the symptom gone away completely?

- Yes
- No

---

Have you experienced this symptom (at any time)?

- Yes

---

When did the symptom begin?

\_\_\_\_\_

---

Does/Did this symptom come and go?

- Yes
- No

---

Has the symptom gone away completely?

- Yes
- No

---

Have you experienced this symptom (at any time)?

- Yes

---

When did the symptom begin?

---

---

Does/Did this symptom come and go?

- Yes  
 No

---

Has the symptom gone away completely?

- Yes  
 No

---

Have you experienced this symptom (at any time)?

- Yes

---

When did the symptom begin?

---

---

Does/Did this symptom come and go?

- Yes  
 No

---

Has the symptom gone away completely?

- Yes  
 No

---

Have you experienced this symptom (at any time)?

- Yes

---

When did the symptom begin?

---

---

Does/Did this symptom come and go?

- Yes  
 No

---

Has the symptom gone away completely?

- Yes  
 No

---

Have you experienced this symptom (at any time)?

- Yes

---

When did the symptom begin?

---

---

Does/Did this symptom come and go?

- Yes  
 No

---

Has the symptom gone away completely?

- Yes  
 No

---

Have you experienced this symptom (at any time)?

- Yes

---

When did the symptom begin?

---

---

Does/Did this symptom come and go?

- Yes  
 No

---

Has the symptom gone away completely?

- Yes  
 No

---

Have you experienced this symptom (at any time)?

- Yes



---

When did the symptom begin?

\_\_\_\_\_

---

Does/Did this symptom come and go?

- Yes
- No

---

Has the symptom gone away completely?

- Yes
- No

---

Have you experienced this symptom (at any time)?

- Yes

---

When did the symptom begin?

\_\_\_\_\_

---

Does/Did this symptom come and go?

- Yes
- No

---

Has the symptom gone away completely?

- Yes
- No

---

Have you experienced this symptom (at any time)?

- Yes

---

When did the symptom begin?

\_\_\_\_\_

---

Does/Did this symptom come and go?

- Yes
- No

---

Has the symptom gone away completely?

- Yes
- No

---

Have you experienced this symptom (at any time)?

- Yes

---

When did the symptom begin?

\_\_\_\_\_

---

Does/Did this symptom come and go?

- Yes
- No

---

Has the symptom gone away completely?

- Yes
- No

---

Have you experienced this symptom (at any time)?

- Yes

---

When did the symptom begin?

\_\_\_\_\_

---

Does/Did this symptom come and go?

- Yes
- No

---

Has the symptom gone away completely?

- Yes
- No

---

Have you experienced this symptom (at any time)?

- Yes

---

When did the symptom begin?

---

---

Does/Did this symptom come and go?

- Yes  
 No

---

Has the symptom gone away completely?

- Yes  
 No

---

Have you experienced this symptom (at any time)?

- Yes

---

When did the symptom begin?

---

---

Does/Did this symptom come and go?

- Yes  
 No

---

Has the symptom gone away completely?

- Yes  
 No

---

Have you experienced this symptom (at any time)?

- Yes

---

When did the symptom begin?

---

---

Does/Did this symptom come and go?

- Yes  
 No

---

Has the symptom gone away completely?

- Yes  
 No

---

Have you experienced this symptom (at any time)?

- Yes

---

When did the symptom begin?

---

---

Does/Did this symptom come and go?

- Yes  
 No

---

Has the symptom gone away completely?

- Yes  
 No

---

Have you experienced this symptom (at any time)?

- Yes

---

When did the symptom begin?

---

---

Does/Did this symptom come and go?

- Yes  
 No

---

Has the symptom gone away completely?

- Yes  
 No

---

Have you experienced this symptom (at any time)?

- Yes

---

When did the symptom begin?

---

---

Does/Did this symptom come and go?

- Yes  
 No

---

Has the symptom gone away completely?

- Yes  
 No

---

Have you experienced this symptom (at any time)?

- Yes

---

When did the symptom begin?

---

---

Does/Did this symptom come and go?

- Yes  
 No

---

Has the symptom gone away completely?

- Yes  
 No

---

Have you experienced this symptom (at any time)?

- Yes

---

When did the symptom begin?

---

---

Does/Did this symptom come and go?

- Yes  
 No

---

Has the symptom gone away completely?

- Yes  
 No

---

Have you experienced this symptom (at any time)?

- Yes

---

When did the symptom begin?

---

---

Does/Did this symptom come and go?

- Yes  
 No

---

Has the symptom gone away completely?

- Yes  
 No

---

Have you experienced this symptom (at any time)?

- Yes

---

When did the symptom begin?

---

---

Does/Did this symptom come and go?

- Yes  
 No

---

Has the symptom gone away completely?

- Yes  
 No

---

Have you experienced this symptom (at any time)?

- Yes

---

When did the symptom begin?

---

---

Does/Did this symptom come and go?

- Yes  
 No

---

Has the symptom gone away completely?

- Yes  
 No

---

Have you experienced this symptom (at any time)?

- Yes

---

When did the symptom begin?

---

---

Does/Did this symptom come and go?

- Yes  
 No

---

Has the symptom gone away completely?

- Yes  
 No

---

Have you experienced this symptom (at any time)?

- Yes

---

When did the symptom begin?

---

---

Does/Did this symptom come and go?

- Yes  
 No

---

Has the symptom gone away completely?

- Yes  
 No

---

Have you experienced this symptom (at any time)?

- Yes

---

When did the symptom begin?

---

---

Does/Did this symptom come and go?

- Yes  
 No

---

Has the symptom gone away completely?

- Yes  
 No

---

Have you experienced this symptom (at any time)?

- Yes

---

When did the symptom begin?

---

---

Does/Did this symptom come and go?

- Yes  
 No

---

Has the symptom gone away completely?

- Yes  
 No

---

Have you experienced this symptom (at any time)?

- Yes

---

When did the symptom begin?

\_\_\_\_\_

---

Does/Did this symptom come and go?

- Yes
- No

---

Has the symptom gone away completely?

- Yes
- No

---

Have you experienced this symptom (at any time)?

- Yes

---

When did the symptom begin?

\_\_\_\_\_

---

Does/Did this symptom come and go?

- Yes
- No

---

Has the symptom gone away completely?

- Yes
- No

---

Have you experienced this symptom (at any time)?

- Yes

---

When did the symptom begin?

\_\_\_\_\_

---

Does/Did this symptom come and go?

- Yes
- No

---

Has the symptom gone away completely?

- Yes
- No

---

Have you experienced this symptom (at any time)?

- Yes

---

When did the symptom begin?

\_\_\_\_\_

---

Does/Did this symptom come and go?

- Yes
- No

---

Has the symptom gone away completely?

- Yes
- No

---

Have you experienced this symptom (at any time)?

- Yes

---

When did the symptom begin?

\_\_\_\_\_

---

Does/Did this symptom come and go?

- Yes
- No

---

Has the symptom gone away completely?

- Yes
- No

---

Have you experienced this symptom (at any time)?

- Yes

---

When did the symptom begin?

\_\_\_\_\_

---

Does/Did this symptom come and go?

- Yes
- No

---

Has the symptom gone away completely?

- Yes
- No

---

Have you experienced this symptom (at any time)?

- Yes

---

When did the symptom begin?

\_\_\_\_\_

---

Does/Did this symptom come and go?

- Yes
- No

---

Has the symptom gone away completely?

- Yes
- No

---

Have you experienced this symptom (at any time)?

- Yes

---

When did the symptom begin?

\_\_\_\_\_

---

Does/Did this symptom come and go?

- Yes
- No

---

Has the symptom gone away completely?

- Yes
- No

---

Have you experienced this symptom (at any time)?

- Yes

---

When did the symptom begin?

\_\_\_\_\_

---

Does/Did this symptom come and go?

- Yes
- No

---

Has the symptom gone away completely?

- Yes
- No

---

Have you experienced this symptom (at any time)?

- Yes

---

When did the symptom begin?

\_\_\_\_\_

---

Does/Did this symptom come and go?

- Yes
- No

---

Has the symptom gone away completely?

- Yes
- No

---

Have you experienced this symptom (at any time)?

- Yes

---

When did the symptom begin?

---

---

Does/Did this symptom come and go?

- Yes  
 No

---

Has the symptom gone away completely?

- Yes  
 No

---

Have you experienced this symptom (at any time)?

- Yes

---

When did the symptom begin?

---

---

Does/Did this symptom come and go?

- Yes  
 No

---

Has the symptom gone away completely?

- Yes  
 No

---

Have you experienced this symptom (at any time)?

- Yes

---

When did the symptom begin?

---

---

Does/Did this symptom come and go?

- Yes  
 No

---

Has the symptom gone away completely?

- Yes  
 No

---

Have you experienced this symptom (at any time)?

- Yes

---

When did the symptom begin?

---

---

Does/Did this symptom come and go?

- Yes  
 No

---

Has the symptom gone away completely?

- Yes  
 No

---

Have you experienced this symptom (at any time)?

- Yes

---

When did the symptom begin?

---

---

Does/Did this symptom come and go?

- Yes  
 No

---

Has the symptom gone away completely?

- Yes  
 No

---

Have you experienced this symptom (at any time)?

- Yes

---

When did the symptom begin?

---

---

Does/Did this symptom come and go?

- Yes  
 No

---

Has the symptom gone away completely?

- Yes  
 No

---

Have you experienced this symptom (at any time)?

- Yes

---

When did the symptom begin?

---

---

Does/Did this symptom come and go?

- Yes  
 No

---

Has the symptom gone away completely?

- Yes  
 No

---

Have you experienced this symptom (at any time)?

- Yes

---

When did the symptom begin?

---

---

Does/Did this symptom come and go?

- Yes  
 No

---

Has the symptom gone away completely?

- Yes  
 No

---

Have you experienced this symptom (at any time)?

- Yes

---

When did the symptom begin?

---

---

Does/Did this symptom come and go?

- Yes  
 No

---

Has the symptom gone away completely?

- Yes  
 No

---

Have you experienced this symptom (at any time)?

- Yes

---

When did the symptom begin?

---

---

Does/Did this symptom come and go?

- Yes  
 No

---

Has the symptom gone away completely?

- Yes  
 No

---

Have you experienced this symptom (at any time)?

- Yes



---

When did the symptom begin?

---

---

Does/Did this symptom come and go?

- Yes  
 No

---

Has the symptom gone away completely?

- Yes  
 No

---

Have you experienced this symptom (at any time)?

- Yes

---

When did the symptom begin?

---

---

Does/Did this symptom come and go?

- Yes  
 No

---

Has the symptom gone away completely?

- Yes  
 No

---

Have you experienced this symptom (at any time)?

- Yes

---

When did the symptom begin?

---

---

Does/Did this symptom come and go?

- Yes  
 No

---

Has the symptom gone away completely?

- Yes  
 No

---

Have you experienced this symptom (at any time)?

- Yes

---

When did the symptom begin?

---

---

Does/Did this symptom come and go?

- Yes  
 No

---

Has the symptom gone away completely?

- Yes  
 No

---

Have you experienced this symptom (at any time)?

- Yes

---

When did the symptom begin?

---

---

Does/Did this symptom come and go?

- Yes  
 No

---

Has the symptom gone away completely?

- Yes  
 No

---

Have you experienced this symptom (at any time)?

- Yes

---

When did the symptom begin?

---

---

Does/Did this symptom come and go?

- Yes  
 No

---

Has the symptom gone away completely?

- Yes  
 No

---

Have you experienced this symptom (at any time)?

- Yes

---

When did the symptom begin?

---

---

Does/Did this symptom come and go?

- Yes  
 No

---

Has the symptom gone away completely?

- Yes  
 No

---

Have you experienced this symptom (at any time)?

- Yes

---

When did the symptom begin?

---

---

Does/Did this symptom come and go?

- Yes  
 No

---

Has the symptom gone away completely?

- Yes  
 No

---

Have you experienced this symptom (at any time)?

- Yes

---

When did the symptom begin?

---

---

Does/Did this symptom come and go?

- Yes  
 No

---

Has the symptom gone away completely?

- Yes  
 No

---

Have you experienced this symptom (at any time)?

- Yes

---

When did the symptom begin?

---

---

Does/Did this symptom come and go?

- Yes  
 No

---

Has the symptom gone away completely?

- Yes  
 No

---

Have you experienced this symptom (at any time)?

- Yes

---

When did the symptom begin?

---

---

Does/Did this symptom come and go?

- Yes  
 No

---

Has the symptom gone away completely?

- Yes  
 No

---

Have you experienced this symptom (at any time)?

- Yes

---

When did the symptom begin?

---

---

Does/Did this symptom come and go?

- Yes  
 No

---

Has the symptom gone away completely?

- Yes  
 No

---

Have you experienced this symptom (at any time)?

- Yes

---

When did the symptom begin?

---

---

Does/Did this symptom come and go?

- Yes  
 No

---

Has the symptom gone away completely?

- Yes  
 No

---

Have you experienced this symptom (at any time)?

- Yes

---

When did the symptom begin?

---

---

Does/Did this symptom come and go?

- Yes  
 No

---

Has the symptom gone away completely?

- Yes  
 No

**While experiencing these symptoms, how much do/did they bother you in terms of discomfort or pain?**

|                                                                                       | Not at all            | A little bit          | Somewhat              | Quite a bit           | Very much             |
|---------------------------------------------------------------------------------------|-----------------------|-----------------------|-----------------------|-----------------------|-----------------------|
| Abdominal pain                                                                        | <input type="radio"/> | <input type="radio"/> | <input type="radio"/> | <input type="radio"/> | <input type="radio"/> |
| Abnormally low temperature                                                            | <input type="radio"/> | <input type="radio"/> | <input type="radio"/> | <input type="radio"/> | <input type="radio"/> |
| Acid reflux                                                                           | <input type="radio"/> | <input type="radio"/> | <input type="radio"/> | <input type="radio"/> | <input type="radio"/> |
| Afternoon or evening fevers/low-grade fevers                                          | <input type="radio"/> | <input type="radio"/> | <input type="radio"/> | <input type="radio"/> | <input type="radio"/> |
| Anemia (low number of red blood cells)                                                | <input type="radio"/> | <input type="radio"/> | <input type="radio"/> | <input type="radio"/> | <input type="radio"/> |
| Anxiety                                                                               | <input type="radio"/> | <input type="radio"/> | <input type="radio"/> | <input type="radio"/> | <input type="radio"/> |
| Arrhythmia (improper beating of the heart due to electrical impulse problems)         | <input type="radio"/> | <input type="radio"/> | <input type="radio"/> | <input type="radio"/> | <input type="radio"/> |
| Bilateral neck throbbing around lymph nodes                                           | <input type="radio"/> | <input type="radio"/> | <input type="radio"/> | <input type="radio"/> | <input type="radio"/> |
| Blurry vision                                                                         | <input type="radio"/> | <input type="radio"/> | <input type="radio"/> | <input type="radio"/> | <input type="radio"/> |
| Bone aches in extremities                                                             | <input type="radio"/> | <input type="radio"/> | <input type="radio"/> | <input type="radio"/> | <input type="radio"/> |
| Brain fog                                                                             | <input type="radio"/> | <input type="radio"/> | <input type="radio"/> | <input type="radio"/> | <input type="radio"/> |
| Brain pressure                                                                        | <input type="radio"/> | <input type="radio"/> | <input type="radio"/> | <input type="radio"/> | <input type="radio"/> |
| Bulging veins                                                                         | <input type="radio"/> | <input type="radio"/> | <input type="radio"/> | <input type="radio"/> | <input type="radio"/> |
| Burning sensations                                                                    | <input type="radio"/> | <input type="radio"/> | <input type="radio"/> | <input type="radio"/> | <input type="radio"/> |
| Bruising of skin                                                                      | <input type="radio"/> | <input type="radio"/> | <input type="radio"/> | <input type="radio"/> | <input type="radio"/> |
| Calf cramps                                                                           | <input type="radio"/> | <input type="radio"/> | <input type="radio"/> | <input type="radio"/> | <input type="radio"/> |
| Change in nails (i.e. white spots, brittleness, change in moons)                      | <input type="radio"/> | <input type="radio"/> | <input type="radio"/> | <input type="radio"/> | <input type="radio"/> |
| Changes in voice                                                                      | <input type="radio"/> | <input type="radio"/> | <input type="radio"/> | <input type="radio"/> | <input type="radio"/> |
| Changed sense of taste                                                                | <input type="radio"/> | <input type="radio"/> | <input type="radio"/> | <input type="radio"/> | <input type="radio"/> |
| Chills but no fever                                                                   | <input type="radio"/> | <input type="radio"/> | <input type="radio"/> | <input type="radio"/> | <input type="radio"/> |
| Clogged ears                                                                          | <input type="radio"/> | <input type="radio"/> | <input type="radio"/> | <input type="radio"/> | <input type="radio"/> |
| Cold burning feeling in lungs                                                         | <input type="radio"/> | <input type="radio"/> | <input type="radio"/> | <input type="radio"/> | <input type="radio"/> |
| Confusion                                                                             | <input type="radio"/> | <input type="radio"/> | <input type="radio"/> | <input type="radio"/> | <input type="radio"/> |
| Congested or runny nose                                                               | <input type="radio"/> | <input type="radio"/> | <input type="radio"/> | <input type="radio"/> | <input type="radio"/> |
| Constant thirst                                                                       | <input type="radio"/> | <input type="radio"/> | <input type="radio"/> | <input type="radio"/> | <input type="radio"/> |
| Costochondritis (inflammation of the cartilage that connects a rib to the breastbone) | <input type="radio"/> | <input type="radio"/> | <input type="radio"/> | <input type="radio"/> | <input type="radio"/> |
| Cough                                                                                 | <input type="radio"/> | <input type="radio"/> | <input type="radio"/> | <input type="radio"/> | <input type="radio"/> |
| Coughing up blood                                                                     | <input type="radio"/> | <input type="radio"/> | <input type="radio"/> | <input type="radio"/> | <input type="radio"/> |

|                                                                                             |                       |                       |                       |                       |                       |
|---------------------------------------------------------------------------------------------|-----------------------|-----------------------|-----------------------|-----------------------|-----------------------|
| Covid toes (tender or itchy rash or chilblains on the toes or foot)                         | <input type="radio"/> | <input type="radio"/> | <input type="radio"/> | <input type="radio"/> | <input type="radio"/> |
| Cracked or dry lips                                                                         | <input type="radio"/> | <input type="radio"/> | <input type="radio"/> | <input type="radio"/> | <input type="radio"/> |
| Dental problems (i.e. chipped tooth, tooth loss)                                            | <input type="radio"/> | <input type="radio"/> | <input type="radio"/> | <input type="radio"/> | <input type="radio"/> |
| Diarrhea                                                                                    | <input type="radio"/> | <input type="radio"/> | <input type="radio"/> | <input type="radio"/> | <input type="radio"/> |
| Difficulty concentrating or focusing                                                        | <input type="radio"/> | <input type="radio"/> | <input type="radio"/> | <input type="radio"/> | <input type="radio"/> |
| Difficulty sleeping                                                                         | <input type="radio"/> | <input type="radio"/> | <input type="radio"/> | <input type="radio"/> | <input type="radio"/> |
| Difficulty speaking properly                                                                | <input type="radio"/> | <input type="radio"/> | <input type="radio"/> | <input type="radio"/> | <input type="radio"/> |
| Discoloration of the skin (for example: purple or blue on the hands or feet, no blistering) | <input type="radio"/> | <input type="radio"/> | <input type="radio"/> | <input type="radio"/> | <input type="radio"/> |
| Dizziness                                                                                   | <input type="radio"/> | <input type="radio"/> | <input type="radio"/> | <input type="radio"/> | <input type="radio"/> |
| Dry eyes                                                                                    | <input type="radio"/> | <input type="radio"/> | <input type="radio"/> | <input type="radio"/> | <input type="radio"/> |
| Dry or peeling skin                                                                         | <input type="radio"/> | <input type="radio"/> | <input type="radio"/> | <input type="radio"/> | <input type="radio"/> |
| Dry scalp or dandruff                                                                       | <input type="radio"/> | <input type="radio"/> | <input type="radio"/> | <input type="radio"/> | <input type="radio"/> |
| Dry throat                                                                                  | <input type="radio"/> | <input type="radio"/> | <input type="radio"/> | <input type="radio"/> | <input type="radio"/> |
| Ear pain/earache                                                                            | <input type="radio"/> | <input type="radio"/> | <input type="radio"/> | <input type="radio"/> | <input type="radio"/> |
| Elevated thyroid hormones                                                                   | <input type="radio"/> | <input type="radio"/> | <input type="radio"/> | <input type="radio"/> | <input type="radio"/> |
| Extreme pressure at base of head or occipital nerve                                         | <input type="radio"/> | <input type="radio"/> | <input type="radio"/> | <input type="radio"/> | <input type="radio"/> |
| Eye stye or infection                                                                       | <input type="radio"/> | <input type="radio"/> | <input type="radio"/> | <input type="radio"/> | <input type="radio"/> |
| Fatigue                                                                                     | <input type="radio"/> | <input type="radio"/> | <input type="radio"/> | <input type="radio"/> | <input type="radio"/> |
| Feeling irritable                                                                           | <input type="radio"/> | <input type="radio"/> | <input type="radio"/> | <input type="radio"/> | <input type="radio"/> |
| Feeling of burning skin                                                                     | <input type="radio"/> | <input type="radio"/> | <input type="radio"/> | <input type="radio"/> | <input type="radio"/> |
| Fever or chills                                                                             | <input type="radio"/> | <input type="radio"/> | <input type="radio"/> | <input type="radio"/> | <input type="radio"/> |
| Floaters or flashes of light in vision                                                      | <input type="radio"/> | <input type="radio"/> | <input type="radio"/> | <input type="radio"/> | <input type="radio"/> |
| Foot pain                                                                                   | <input type="radio"/> | <input type="radio"/> | <input type="radio"/> | <input type="radio"/> | <input type="radio"/> |
| GERD (acid reflux) with excessive salivation                                                | <input type="radio"/> | <input type="radio"/> | <input type="radio"/> | <input type="radio"/> | <input type="radio"/> |
| Goiter or lump in throat                                                                    | <input type="radio"/> | <input type="radio"/> | <input type="radio"/> | <input type="radio"/> | <input type="radio"/> |
| Hair loss                                                                                   | <input type="radio"/> | <input type="radio"/> | <input type="radio"/> | <input type="radio"/> | <input type="radio"/> |
| Hand or wrist pain                                                                          | <input type="radio"/> | <input type="radio"/> | <input type="radio"/> | <input type="radio"/> | <input type="radio"/> |
| Headache                                                                                    | <input type="radio"/> | <input type="radio"/> | <input type="radio"/> | <input type="radio"/> | <input type="radio"/> |
| Heart palpitations (heart skipping a beat or racing)                                        | <input type="radio"/> | <input type="radio"/> | <input type="radio"/> | <input type="radio"/> | <input type="radio"/> |
| Heat intolerance                                                                            | <input type="radio"/> | <input type="radio"/> | <input type="radio"/> | <input type="radio"/> | <input type="radio"/> |
| High blood pressure                                                                         | <input type="radio"/> | <input type="radio"/> | <input type="radio"/> | <input type="radio"/> | <input type="radio"/> |
| Hormone imbalances                                                                          | <input type="radio"/> | <input type="radio"/> | <input type="radio"/> | <input type="radio"/> | <input type="radio"/> |

|                                                             |                       |                       |                       |                       |                       |
|-------------------------------------------------------------|-----------------------|-----------------------|-----------------------|-----------------------|-----------------------|
| "Hot" blood rush                                            | <input type="radio"/> | <input type="radio"/> | <input type="radio"/> | <input type="radio"/> | <input type="radio"/> |
| Inability to cry                                            | <input type="radio"/> | <input type="radio"/> | <input type="radio"/> | <input type="radio"/> | <input type="radio"/> |
| Inability to exercise or be active                          | <input type="radio"/> | <input type="radio"/> | <input type="radio"/> | <input type="radio"/> | <input type="radio"/> |
| Inability to yawn                                           | <input type="radio"/> | <input type="radio"/> | <input type="radio"/> | <input type="radio"/> | <input type="radio"/> |
| Internal tremors or buzzing/vibration                       | <input type="radio"/> | <input type="radio"/> | <input type="radio"/> | <input type="radio"/> | <input type="radio"/> |
| Irregular or skipped menstrual cycles                       | <input type="radio"/> | <input type="radio"/> | <input type="radio"/> | <input type="radio"/> | <input type="radio"/> |
| Jaw pain                                                    | <input type="radio"/> | <input type="radio"/> | <input type="radio"/> | <input type="radio"/> | <input type="radio"/> |
| Joint pain                                                  | <input type="radio"/> | <input type="radio"/> | <input type="radio"/> | <input type="radio"/> | <input type="radio"/> |
| Kidney issues or protein in urine                           | <input type="radio"/> | <input type="radio"/> | <input type="radio"/> | <input type="radio"/> | <input type="radio"/> |
| Kidney pain                                                 | <input type="radio"/> | <input type="radio"/> | <input type="radio"/> | <input type="radio"/> | <input type="radio"/> |
| Low blood oxygen                                            | <input type="radio"/> | <input type="radio"/> | <input type="radio"/> | <input type="radio"/> | <input type="radio"/> |
| Low blood pressure                                          | <input type="radio"/> | <input type="radio"/> | <input type="radio"/> | <input type="radio"/> | <input type="radio"/> |
| Lower back pain                                             | <input type="radio"/> | <input type="radio"/> | <input type="radio"/> | <input type="radio"/> | <input type="radio"/> |
| Loss of appetite                                            | <input type="radio"/> | <input type="radio"/> | <input type="radio"/> | <input type="radio"/> | <input type="radio"/> |
| Loss of hearing                                             | <input type="radio"/> | <input type="radio"/> | <input type="radio"/> | <input type="radio"/> | <input type="radio"/> |
| Loss or decrease in quality of vision                       | <input type="radio"/> | <input type="radio"/> | <input type="radio"/> | <input type="radio"/> | <input type="radio"/> |
| Lump in throat/difficulty swallowing                        | <input type="radio"/> | <input type="radio"/> | <input type="radio"/> | <input type="radio"/> | <input type="radio"/> |
| Memory problems                                             | <input type="radio"/> | <input type="radio"/> | <input type="radio"/> | <input type="radio"/> | <input type="radio"/> |
| Menstrual cycles that are heavier or lighter than normal    | <input type="radio"/> | <input type="radio"/> | <input type="radio"/> | <input type="radio"/> | <input type="radio"/> |
| Mid-back pain at base of ribs                               | <input type="radio"/> | <input type="radio"/> | <input type="radio"/> | <input type="radio"/> | <input type="radio"/> |
| Mouth sores or sore tongue                                  | <input type="radio"/> | <input type="radio"/> | <input type="radio"/> | <input type="radio"/> | <input type="radio"/> |
| Muscle or body aches                                        | <input type="radio"/> | <input type="radio"/> | <input type="radio"/> | <input type="radio"/> | <input type="radio"/> |
| Muscle twitching                                            | <input type="radio"/> | <input type="radio"/> | <input type="radio"/> | <input type="radio"/> | <input type="radio"/> |
| Nausea or vomiting                                          | <input type="radio"/> | <input type="radio"/> | <input type="radio"/> | <input type="radio"/> | <input type="radio"/> |
| Neck muscle pain                                            | <input type="radio"/> | <input type="radio"/> | <input type="radio"/> | <input type="radio"/> | <input type="radio"/> |
| Nerve pain                                                  | <input type="radio"/> | <input type="radio"/> | <input type="radio"/> | <input type="radio"/> | <input type="radio"/> |
| Nerve sensations (tingling, pins and needles, numbness)     | <input type="radio"/> | <input type="radio"/> | <input type="radio"/> | <input type="radio"/> | <input type="radio"/> |
| Neuropathy in feet and hands (weakness, numbness, and pain) | <input type="radio"/> | <input type="radio"/> | <input type="radio"/> | <input type="radio"/> | <input type="radio"/> |
| New allergies                                               | <input type="radio"/> | <input type="radio"/> | <input type="radio"/> | <input type="radio"/> | <input type="radio"/> |
| Night sweats                                                | <input type="radio"/> | <input type="radio"/> | <input type="radio"/> | <input type="radio"/> | <input type="radio"/> |
| Nightmares                                                  | <input type="radio"/> | <input type="radio"/> | <input type="radio"/> | <input type="radio"/> | <input type="radio"/> |
| Painful scalp                                               | <input type="radio"/> | <input type="radio"/> | <input type="radio"/> | <input type="radio"/> | <input type="radio"/> |
| Partial or complete loss of sense of smell                  | <input type="radio"/> | <input type="radio"/> | <input type="radio"/> | <input type="radio"/> | <input type="radio"/> |

|                                                                                 |                       |                       |                       |                       |                       |
|---------------------------------------------------------------------------------|-----------------------|-----------------------|-----------------------|-----------------------|-----------------------|
| Partial or complete loss of sense of taste                                      | <input type="radio"/> | <input type="radio"/> | <input type="radio"/> | <input type="radio"/> | <input type="radio"/> |
| Persistent chest pain or pressure                                               | <input type="radio"/> | <input type="radio"/> | <input type="radio"/> | <input type="radio"/> | <input type="radio"/> |
| Personality change (drastic)                                                    | <input type="radio"/> | <input type="radio"/> | <input type="radio"/> | <input type="radio"/> | <input type="radio"/> |
| Petechiae (pinpoint rash)                                                       | <input type="radio"/> | <input type="radio"/> | <input type="radio"/> | <input type="radio"/> | <input type="radio"/> |
| Phantom smells                                                                  | <input type="radio"/> | <input type="radio"/> | <input type="radio"/> | <input type="radio"/> | <input type="radio"/> |
| Phlegm in back of throat                                                        | <input type="radio"/> | <input type="radio"/> | <input type="radio"/> | <input type="radio"/> | <input type="radio"/> |
| Post-exertional malaise (worsened symptoms or flu-like symptoms after exertion) | <input type="radio"/> | <input type="radio"/> | <input type="radio"/> | <input type="radio"/> | <input type="radio"/> |
| Postnasal drip                                                                  | <input type="radio"/> | <input type="radio"/> | <input type="radio"/> | <input type="radio"/> | <input type="radio"/> |
| Rash                                                                            | <input type="radio"/> | <input type="radio"/> | <input type="radio"/> | <input type="radio"/> | <input type="radio"/> |
| Reflux or heartburn                                                             | <input type="radio"/> | <input type="radio"/> | <input type="radio"/> | <input type="radio"/> | <input type="radio"/> |
| Runny nose                                                                      | <input type="radio"/> | <input type="radio"/> | <input type="radio"/> | <input type="radio"/> | <input type="radio"/> |
| Sadness                                                                         | <input type="radio"/> | <input type="radio"/> | <input type="radio"/> | <input type="radio"/> | <input type="radio"/> |
| Seizures                                                                        | <input type="radio"/> | <input type="radio"/> | <input type="radio"/> | <input type="radio"/> | <input type="radio"/> |
| Sharp or sudden chest pain                                                      | <input type="radio"/> | <input type="radio"/> | <input type="radio"/> | <input type="radio"/> | <input type="radio"/> |
| Shortness of breath or difficulty breathing                                     | <input type="radio"/> | <input type="radio"/> | <input type="radio"/> | <input type="radio"/> | <input type="radio"/> |
| Shortness of breath or exhaustion from bending over                             | <input type="radio"/> | <input type="radio"/> | <input type="radio"/> | <input type="radio"/> | <input type="radio"/> |
| Sleeping more than normal                                                       | <input type="radio"/> | <input type="radio"/> | <input type="radio"/> | <input type="radio"/> | <input type="radio"/> |
| Sore throat                                                                     | <input type="radio"/> | <input type="radio"/> | <input type="radio"/> | <input type="radio"/> | <input type="radio"/> |
| Spinal issues                                                                   | <input type="radio"/> | <input type="radio"/> | <input type="radio"/> | <input type="radio"/> | <input type="radio"/> |
| Spikes in blood pressure                                                        | <input type="radio"/> | <input type="radio"/> | <input type="radio"/> | <input type="radio"/> | <input type="radio"/> |
| Swollen hands or feet                                                           | <input type="radio"/> | <input type="radio"/> | <input type="radio"/> | <input type="radio"/> | <input type="radio"/> |
| Swollen lymph nodes                                                             | <input type="radio"/> | <input type="radio"/> | <input type="radio"/> | <input type="radio"/> | <input type="radio"/> |
| Syncope (fainting)                                                              | <input type="radio"/> | <input type="radio"/> | <input type="radio"/> | <input type="radio"/> | <input type="radio"/> |
| Tachycardia (rapid heartbeat) at rest                                           | <input type="radio"/> | <input type="radio"/> | <input type="radio"/> | <input type="radio"/> | <input type="radio"/> |
| Tachycardia (rapid heartbeat) after standing up                                 | <input type="radio"/> | <input type="radio"/> | <input type="radio"/> | <input type="radio"/> | <input type="radio"/> |
| Thrush (white fungal infection in the mouth or throat)                          | <input type="radio"/> | <input type="radio"/> | <input type="radio"/> | <input type="radio"/> | <input type="radio"/> |
| Tinnitus or humming in ears                                                     | <input type="radio"/> | <input type="radio"/> | <input type="radio"/> | <input type="radio"/> | <input type="radio"/> |
| Tremors or shakiness                                                            | <input type="radio"/> | <input type="radio"/> | <input type="radio"/> | <input type="radio"/> | <input type="radio"/> |
| Upper back pain                                                                 | <input type="radio"/> | <input type="radio"/> | <input type="radio"/> | <input type="radio"/> | <input type="radio"/> |
| UTI (urinary tract infection)                                                   | <input type="radio"/> | <input type="radio"/> | <input type="radio"/> | <input type="radio"/> | <input type="radio"/> |
| Weakened neck                                                                   | <input type="radio"/> | <input type="radio"/> | <input type="radio"/> | <input type="radio"/> | <input type="radio"/> |
| Weight gain                                                                     | <input type="radio"/> | <input type="radio"/> | <input type="radio"/> | <input type="radio"/> | <input type="radio"/> |

**After quarantine, how much does/did the symptom impair your ability to work compared to pre-COVID?**

|                                                                                       |                       |                       |                       |                       |                       |
|---------------------------------------------------------------------------------------|-----------------------|-----------------------|-----------------------|-----------------------|-----------------------|
| Abdominal pain                                                                        | <input type="radio"/> | <input type="radio"/> | <input type="radio"/> | <input type="radio"/> | <input type="radio"/> |
| Abnormally low temperature                                                            | <input type="radio"/> | <input type="radio"/> | <input type="radio"/> | <input type="radio"/> | <input type="radio"/> |
| Acid reflux                                                                           | <input type="radio"/> | <input type="radio"/> | <input type="radio"/> | <input type="radio"/> | <input type="radio"/> |
| Afternoon or evening fevers/low-grade fevers                                          | <input type="radio"/> | <input type="radio"/> | <input type="radio"/> | <input type="radio"/> | <input type="radio"/> |
| Anemia (low number of red blood cells)                                                | <input type="radio"/> | <input type="radio"/> | <input type="radio"/> | <input type="radio"/> | <input type="radio"/> |
| Anxiety                                                                               | <input type="radio"/> | <input type="radio"/> | <input type="radio"/> | <input type="radio"/> | <input type="radio"/> |
| Arrhythmia (improper beating of the heart due to electrical impulse problems)         | <input type="radio"/> | <input type="radio"/> | <input type="radio"/> | <input type="radio"/> | <input type="radio"/> |
| Bilateral neck throbbing around lymph nodes                                           | <input type="radio"/> | <input type="radio"/> | <input type="radio"/> | <input type="radio"/> | <input type="radio"/> |
| Blurry vision                                                                         | <input type="radio"/> | <input type="radio"/> | <input type="radio"/> | <input type="radio"/> | <input type="radio"/> |
| Bone aches in extremities                                                             | <input type="radio"/> | <input type="radio"/> | <input type="radio"/> | <input type="radio"/> | <input type="radio"/> |
| Brain fog                                                                             | <input type="radio"/> | <input type="radio"/> | <input type="radio"/> | <input type="radio"/> | <input type="radio"/> |
| Brain pressure                                                                        | <input type="radio"/> | <input type="radio"/> | <input type="radio"/> | <input type="radio"/> | <input type="radio"/> |
| Bulging veins                                                                         | <input type="radio"/> | <input type="radio"/> | <input type="radio"/> | <input type="radio"/> | <input type="radio"/> |
| Burning sensations                                                                    | <input type="radio"/> | <input type="radio"/> | <input type="radio"/> | <input type="radio"/> | <input type="radio"/> |
| Bruising of skin                                                                      | <input type="radio"/> | <input type="radio"/> | <input type="radio"/> | <input type="radio"/> | <input type="radio"/> |
| Calf cramps                                                                           | <input type="radio"/> | <input type="radio"/> | <input type="radio"/> | <input type="radio"/> | <input type="radio"/> |
| Change in nails (i.e. white spots, brittleness, change in moons)                      | <input type="radio"/> | <input type="radio"/> | <input type="radio"/> | <input type="radio"/> | <input type="radio"/> |
| Changes in voice                                                                      | <input type="radio"/> | <input type="radio"/> | <input type="radio"/> | <input type="radio"/> | <input type="radio"/> |
| Changed sense of taste                                                                | <input type="radio"/> | <input type="radio"/> | <input type="radio"/> | <input type="radio"/> | <input type="radio"/> |
| Chills but no fever                                                                   | <input type="radio"/> | <input type="radio"/> | <input type="radio"/> | <input type="radio"/> | <input type="radio"/> |
| Clogged ears                                                                          | <input type="radio"/> | <input type="radio"/> | <input type="radio"/> | <input type="radio"/> | <input type="radio"/> |
| Cold burning feeling in lungs                                                         | <input type="radio"/> | <input type="radio"/> | <input type="radio"/> | <input type="radio"/> | <input type="radio"/> |
| Confusion                                                                             | <input type="radio"/> | <input type="radio"/> | <input type="radio"/> | <input type="radio"/> | <input type="radio"/> |
| Congested or runny nose                                                               | <input type="radio"/> | <input type="radio"/> | <input type="radio"/> | <input type="radio"/> | <input type="radio"/> |
| Constant thirst                                                                       | <input type="radio"/> | <input type="radio"/> | <input type="radio"/> | <input type="radio"/> | <input type="radio"/> |
| Costochondritis (inflammation of the cartilage that connects a rib to the breastbone) | <input type="radio"/> | <input type="radio"/> | <input type="radio"/> | <input type="radio"/> | <input type="radio"/> |
| Cough                                                                                 | <input type="radio"/> | <input type="radio"/> | <input type="radio"/> | <input type="radio"/> | <input type="radio"/> |
| Coughing up blood                                                                     | <input type="radio"/> | <input type="radio"/> | <input type="radio"/> | <input type="radio"/> | <input type="radio"/> |
| Covid toes (tender or itchy rash or chilblains on the toes or foot)                   | <input type="radio"/> | <input type="radio"/> | <input type="radio"/> | <input type="radio"/> | <input type="radio"/> |



|                                                                                             |                       |                       |                       |                       |                       |
|---------------------------------------------------------------------------------------------|-----------------------|-----------------------|-----------------------|-----------------------|-----------------------|
| Cracked or dry lips                                                                         | <input type="radio"/> | <input type="radio"/> | <input type="radio"/> | <input type="radio"/> | <input type="radio"/> |
| Dental problems (i.e. chipped tooth, tooth loss)                                            | <input type="radio"/> | <input type="radio"/> | <input type="radio"/> | <input type="radio"/> | <input type="radio"/> |
| Diarrhea                                                                                    | <input type="radio"/> | <input type="radio"/> | <input type="radio"/> | <input type="radio"/> | <input type="radio"/> |
| Difficulty concentrating or focusing                                                        | <input type="radio"/> | <input type="radio"/> | <input type="radio"/> | <input type="radio"/> | <input type="radio"/> |
| Difficulty sleeping                                                                         | <input type="radio"/> | <input type="radio"/> | <input type="radio"/> | <input type="radio"/> | <input type="radio"/> |
| Difficulty speaking properly                                                                | <input type="radio"/> | <input type="radio"/> | <input type="radio"/> | <input type="radio"/> | <input type="radio"/> |
| Discoloration of the skin (for example: purple or blue on the hands or feet, no blistering) | <input type="radio"/> | <input type="radio"/> | <input type="radio"/> | <input type="radio"/> | <input type="radio"/> |
| Dizziness                                                                                   | <input type="radio"/> | <input type="radio"/> | <input type="radio"/> | <input type="radio"/> | <input type="radio"/> |
| Dry eyes                                                                                    | <input type="radio"/> | <input type="radio"/> | <input type="radio"/> | <input type="radio"/> | <input type="radio"/> |
| Dry or peeling skin                                                                         | <input type="radio"/> | <input type="radio"/> | <input type="radio"/> | <input type="radio"/> | <input type="radio"/> |
| Dry scalp or dandruff                                                                       | <input type="radio"/> | <input type="radio"/> | <input type="radio"/> | <input type="radio"/> | <input type="radio"/> |
| Dry throat                                                                                  | <input type="radio"/> | <input type="radio"/> | <input type="radio"/> | <input type="radio"/> | <input type="radio"/> |
| Ear pain/earache                                                                            | <input type="radio"/> | <input type="radio"/> | <input type="radio"/> | <input type="radio"/> | <input type="radio"/> |
| Elevated thyroid hormones                                                                   | <input type="radio"/> | <input type="radio"/> | <input type="radio"/> | <input type="radio"/> | <input type="radio"/> |
| Extreme pressure at base of head or occipital nerve                                         | <input type="radio"/> | <input type="radio"/> | <input type="radio"/> | <input type="radio"/> | <input type="radio"/> |
| Eye stye or infection                                                                       | <input type="radio"/> | <input type="radio"/> | <input type="radio"/> | <input type="radio"/> | <input type="radio"/> |
| Fatigue                                                                                     | <input type="radio"/> | <input type="radio"/> | <input type="radio"/> | <input type="radio"/> | <input type="radio"/> |
| Feeling irritable                                                                           | <input type="radio"/> | <input type="radio"/> | <input type="radio"/> | <input type="radio"/> | <input type="radio"/> |
| Feeling of burning skin                                                                     | <input type="radio"/> | <input type="radio"/> | <input type="radio"/> | <input type="radio"/> | <input type="radio"/> |
| Fever or chills                                                                             | <input type="radio"/> | <input type="radio"/> | <input type="radio"/> | <input type="radio"/> | <input type="radio"/> |
| Floaters or flashes of light in vision                                                      | <input type="radio"/> | <input type="radio"/> | <input type="radio"/> | <input type="radio"/> | <input type="radio"/> |
| Foot pain                                                                                   | <input type="radio"/> | <input type="radio"/> | <input type="radio"/> | <input type="radio"/> | <input type="radio"/> |
| GERD (acid reflux) with excessive salivation                                                | <input type="radio"/> | <input type="radio"/> | <input type="radio"/> | <input type="radio"/> | <input type="radio"/> |
| Goiter or lump in throat                                                                    | <input type="radio"/> | <input type="radio"/> | <input type="radio"/> | <input type="radio"/> | <input type="radio"/> |
| Hair loss                                                                                   | <input type="radio"/> | <input type="radio"/> | <input type="radio"/> | <input type="radio"/> | <input type="radio"/> |
| Hand or wrist pain                                                                          | <input type="radio"/> | <input type="radio"/> | <input type="radio"/> | <input type="radio"/> | <input type="radio"/> |
| Headache                                                                                    | <input type="radio"/> | <input type="radio"/> | <input type="radio"/> | <input type="radio"/> | <input type="radio"/> |
| Heart palpitations (heart skipping a beat or racing)                                        | <input type="radio"/> | <input type="radio"/> | <input type="radio"/> | <input type="radio"/> | <input type="radio"/> |
| Heat intolerance                                                                            | <input type="radio"/> | <input type="radio"/> | <input type="radio"/> | <input type="radio"/> | <input type="radio"/> |
| High blood pressure                                                                         | <input type="radio"/> | <input type="radio"/> | <input type="radio"/> | <input type="radio"/> | <input type="radio"/> |
| Hormone imbalances                                                                          | <input type="radio"/> | <input type="radio"/> | <input type="radio"/> | <input type="radio"/> | <input type="radio"/> |
| "Hot" blood rush                                                                            | <input type="radio"/> | <input type="radio"/> | <input type="radio"/> | <input type="radio"/> | <input type="radio"/> |
| Inability to cry                                                                            | <input type="radio"/> | <input type="radio"/> | <input type="radio"/> | <input type="radio"/> | <input type="radio"/> |

|                                                             |                       |                       |                       |                       |                       |
|-------------------------------------------------------------|-----------------------|-----------------------|-----------------------|-----------------------|-----------------------|
| Inability to exercise or be active                          | <input type="radio"/> | <input type="radio"/> | <input type="radio"/> | <input type="radio"/> | <input type="radio"/> |
| Inability to yawn                                           | <input type="radio"/> | <input type="radio"/> | <input type="radio"/> | <input type="radio"/> | <input type="radio"/> |
| Internal tremors or buzzing/vibration                       | <input type="radio"/> | <input type="radio"/> | <input type="radio"/> | <input type="radio"/> | <input type="radio"/> |
| Irregular or skipped menstrual cycles                       | <input type="radio"/> | <input type="radio"/> | <input type="radio"/> | <input type="radio"/> | <input type="radio"/> |
| Jaw pain                                                    | <input type="radio"/> | <input type="radio"/> | <input type="radio"/> | <input type="radio"/> | <input type="radio"/> |
| Joint pain                                                  | <input type="radio"/> | <input type="radio"/> | <input type="radio"/> | <input type="radio"/> | <input type="radio"/> |
| Kidney issues or protein in urine                           | <input type="radio"/> | <input type="radio"/> | <input type="radio"/> | <input type="radio"/> | <input type="radio"/> |
| Kidney pain                                                 | <input type="radio"/> | <input type="radio"/> | <input type="radio"/> | <input type="radio"/> | <input type="radio"/> |
| Low blood oxygen                                            | <input type="radio"/> | <input type="radio"/> | <input type="radio"/> | <input type="radio"/> | <input type="radio"/> |
| Low blood pressure                                          | <input type="radio"/> | <input type="radio"/> | <input type="radio"/> | <input type="radio"/> | <input type="radio"/> |
| Lower back pain                                             | <input type="radio"/> | <input type="radio"/> | <input type="radio"/> | <input type="radio"/> | <input type="radio"/> |
| Loss of appetite                                            | <input type="radio"/> | <input type="radio"/> | <input type="radio"/> | <input type="radio"/> | <input type="radio"/> |
| Loss of hearing                                             | <input type="radio"/> | <input type="radio"/> | <input type="radio"/> | <input type="radio"/> | <input type="radio"/> |
| Loss or decrease in quality of vision                       | <input type="radio"/> | <input type="radio"/> | <input type="radio"/> | <input type="radio"/> | <input type="radio"/> |
| Lump in throat/difficulty swallowing                        | <input type="radio"/> | <input type="radio"/> | <input type="radio"/> | <input type="radio"/> | <input type="radio"/> |
| Memory problems                                             | <input type="radio"/> | <input type="radio"/> | <input type="radio"/> | <input type="radio"/> | <input type="radio"/> |
| Menstrual cycles that are heavier or lighter than normal    | <input type="radio"/> | <input type="radio"/> | <input type="radio"/> | <input type="radio"/> | <input type="radio"/> |
| Mid-back pain at base of ribs                               | <input type="radio"/> | <input type="radio"/> | <input type="radio"/> | <input type="radio"/> | <input type="radio"/> |
| Mouth sores or sore tongue                                  | <input type="radio"/> | <input type="radio"/> | <input type="radio"/> | <input type="radio"/> | <input type="radio"/> |
| Muscle or body aches                                        | <input type="radio"/> | <input type="radio"/> | <input type="radio"/> | <input type="radio"/> | <input type="radio"/> |
| Muscle twitching                                            | <input type="radio"/> | <input type="radio"/> | <input type="radio"/> | <input type="radio"/> | <input type="radio"/> |
| Nausea or vomiting                                          | <input type="radio"/> | <input type="radio"/> | <input type="radio"/> | <input type="radio"/> | <input type="radio"/> |
| Neck muscle pain                                            | <input type="radio"/> | <input type="radio"/> | <input type="radio"/> | <input type="radio"/> | <input type="radio"/> |
| Nerve pain                                                  | <input type="radio"/> | <input type="radio"/> | <input type="radio"/> | <input type="radio"/> | <input type="radio"/> |
| Nerve sensations (tingling, pins and needles, numbness)     | <input type="radio"/> | <input type="radio"/> | <input type="radio"/> | <input type="radio"/> | <input type="radio"/> |
| Neuropathy in feet and hands (weakness, numbness, and pain) | <input type="radio"/> | <input type="radio"/> | <input type="radio"/> | <input type="radio"/> | <input type="radio"/> |
| New allergies                                               | <input type="radio"/> | <input type="radio"/> | <input type="radio"/> | <input type="radio"/> | <input type="radio"/> |
| Night sweats                                                | <input type="radio"/> | <input type="radio"/> | <input type="radio"/> | <input type="radio"/> | <input type="radio"/> |
| Nightmares                                                  | <input type="radio"/> | <input type="radio"/> | <input type="radio"/> | <input type="radio"/> | <input type="radio"/> |
| Painful scalp                                               | <input type="radio"/> | <input type="radio"/> | <input type="radio"/> | <input type="radio"/> | <input type="radio"/> |
| Partial or complete loss of sense of smell                  | <input type="radio"/> | <input type="radio"/> | <input type="radio"/> | <input type="radio"/> | <input type="radio"/> |
| Partial or complete loss of sense of taste                  | <input type="radio"/> | <input type="radio"/> | <input type="radio"/> | <input type="radio"/> | <input type="radio"/> |

|                                                                                       |                       |                       |                       |                       |                       |
|---------------------------------------------------------------------------------------|-----------------------|-----------------------|-----------------------|-----------------------|-----------------------|
| Persistent chest pain or pressure                                                     | <input type="radio"/> | <input type="radio"/> | <input type="radio"/> | <input type="radio"/> | <input type="radio"/> |
| Personality change (drastic)                                                          | <input type="radio"/> | <input type="radio"/> | <input type="radio"/> | <input type="radio"/> | <input type="radio"/> |
| Petechiae (pinpoint rash)                                                             | <input type="radio"/> | <input type="radio"/> | <input type="radio"/> | <input type="radio"/> | <input type="radio"/> |
| Phantom smells                                                                        | <input type="radio"/> | <input type="radio"/> | <input type="radio"/> | <input type="radio"/> | <input type="radio"/> |
| Phlegm in back of throat                                                              | <input type="radio"/> | <input type="radio"/> | <input type="radio"/> | <input type="radio"/> | <input type="radio"/> |
| Post-exertional malaise<br>(worsened symptoms or flu-like<br>symptoms after exertion) | <input type="radio"/> | <input type="radio"/> | <input type="radio"/> | <input type="radio"/> | <input type="radio"/> |
| Postnasal drip                                                                        | <input type="radio"/> | <input type="radio"/> | <input type="radio"/> | <input type="radio"/> | <input type="radio"/> |
| Rash                                                                                  | <input type="radio"/> | <input type="radio"/> | <input type="radio"/> | <input type="radio"/> | <input type="radio"/> |
| Reflux or heartburn                                                                   | <input type="radio"/> | <input type="radio"/> | <input type="radio"/> | <input type="radio"/> | <input type="radio"/> |
| Runny nose                                                                            | <input type="radio"/> | <input type="radio"/> | <input type="radio"/> | <input type="radio"/> | <input type="radio"/> |
| Sadness                                                                               | <input type="radio"/> | <input type="radio"/> | <input type="radio"/> | <input type="radio"/> | <input type="radio"/> |
| Seizures                                                                              | <input type="radio"/> | <input type="radio"/> | <input type="radio"/> | <input type="radio"/> | <input type="radio"/> |
| Sharp or sudden chest pain                                                            | <input type="radio"/> | <input type="radio"/> | <input type="radio"/> | <input type="radio"/> | <input type="radio"/> |
| Shortness of breath or difficulty<br>breathing                                        | <input type="radio"/> | <input type="radio"/> | <input type="radio"/> | <input type="radio"/> | <input type="radio"/> |
| Shortness of breath or<br>exhaustion from bending over                                | <input type="radio"/> | <input type="radio"/> | <input type="radio"/> | <input type="radio"/> | <input type="radio"/> |
| Sleeping more than normal                                                             | <input type="radio"/> | <input type="radio"/> | <input type="radio"/> | <input type="radio"/> | <input type="radio"/> |
| Sore throat                                                                           | <input type="radio"/> | <input type="radio"/> | <input type="radio"/> | <input type="radio"/> | <input type="radio"/> |
| Spinal issues                                                                         | <input type="radio"/> | <input type="radio"/> | <input type="radio"/> | <input type="radio"/> | <input type="radio"/> |
| Spikes in blood pressure                                                              | <input type="radio"/> | <input type="radio"/> | <input type="radio"/> | <input type="radio"/> | <input type="radio"/> |
| Swollen hands or feet                                                                 | <input type="radio"/> | <input type="radio"/> | <input type="radio"/> | <input type="radio"/> | <input type="radio"/> |
| Swollen lymph nodes                                                                   | <input type="radio"/> | <input type="radio"/> | <input type="radio"/> | <input type="radio"/> | <input type="radio"/> |
| Syncope (fainting)                                                                    | <input type="radio"/> | <input type="radio"/> | <input type="radio"/> | <input type="radio"/> | <input type="radio"/> |
| Tachycardia (rapid heartbeat) at<br>rest                                              | <input type="radio"/> | <input type="radio"/> | <input type="radio"/> | <input type="radio"/> | <input type="radio"/> |
| Tachycardia (rapid heartbeat)<br>after standing up                                    | <input type="radio"/> | <input type="radio"/> | <input type="radio"/> | <input type="radio"/> | <input type="radio"/> |
| Thrush (white fungal infection in<br>the mouth or throat)                             | <input type="radio"/> | <input type="radio"/> | <input type="radio"/> | <input type="radio"/> | <input type="radio"/> |
| Tinnitus or humming in ears                                                           | <input type="radio"/> | <input type="radio"/> | <input type="radio"/> | <input type="radio"/> | <input type="radio"/> |
| Tremors or shakiness                                                                  | <input type="radio"/> | <input type="radio"/> | <input type="radio"/> | <input type="radio"/> | <input type="radio"/> |
| Upper back pain                                                                       | <input type="radio"/> | <input type="radio"/> | <input type="radio"/> | <input type="radio"/> | <input type="radio"/> |
| UTI (urinary tract infection)                                                         | <input type="radio"/> | <input type="radio"/> | <input type="radio"/> | <input type="radio"/> | <input type="radio"/> |
| Weakened neck                                                                         | <input type="radio"/> | <input type="radio"/> | <input type="radio"/> | <input type="radio"/> | <input type="radio"/> |
| Weight gain                                                                           | <input type="radio"/> | <input type="radio"/> | <input type="radio"/> | <input type="radio"/> | <input type="radio"/> |

**After quarantine, how much does/did the symptom impair your social or family functioning compared to pre-COVID?**

|                                                                                       |                       |                       |                       |                       |                       |
|---------------------------------------------------------------------------------------|-----------------------|-----------------------|-----------------------|-----------------------|-----------------------|
| Abdominal pain                                                                        | <input type="radio"/> | <input type="radio"/> | <input type="radio"/> | <input type="radio"/> | <input type="radio"/> |
| Abnormally low temperature                                                            | <input type="radio"/> | <input type="radio"/> | <input type="radio"/> | <input type="radio"/> | <input type="radio"/> |
| Acid reflux                                                                           | <input type="radio"/> | <input type="radio"/> | <input type="radio"/> | <input type="radio"/> | <input type="radio"/> |
| Afternoon or evening fevers/low-grade fevers                                          | <input type="radio"/> | <input type="radio"/> | <input type="radio"/> | <input type="radio"/> | <input type="radio"/> |
| Anemia (low number of red blood cells)                                                | <input type="radio"/> | <input type="radio"/> | <input type="radio"/> | <input type="radio"/> | <input type="radio"/> |
| Anxiety                                                                               | <input type="radio"/> | <input type="radio"/> | <input type="radio"/> | <input type="radio"/> | <input type="radio"/> |
| Arrhythmia (improper beating of the heart due to electrical impulse problems)         | <input type="radio"/> | <input type="radio"/> | <input type="radio"/> | <input type="radio"/> | <input type="radio"/> |
| Bilateral neck throbbing around lymph nodes                                           | <input type="radio"/> | <input type="radio"/> | <input type="radio"/> | <input type="radio"/> | <input type="radio"/> |
| Blurry vision                                                                         | <input type="radio"/> | <input type="radio"/> | <input type="radio"/> | <input type="radio"/> | <input type="radio"/> |
| Bone aches in extremities                                                             | <input type="radio"/> | <input type="radio"/> | <input type="radio"/> | <input type="radio"/> | <input type="radio"/> |
| Brain fog                                                                             | <input type="radio"/> | <input type="radio"/> | <input type="radio"/> | <input type="radio"/> | <input type="radio"/> |
| Brain pressure                                                                        | <input type="radio"/> | <input type="radio"/> | <input type="radio"/> | <input type="radio"/> | <input type="radio"/> |
| Bulging veins                                                                         | <input type="radio"/> | <input type="radio"/> | <input type="radio"/> | <input type="radio"/> | <input type="radio"/> |
| Burning sensations                                                                    | <input type="radio"/> | <input type="radio"/> | <input type="radio"/> | <input type="radio"/> | <input type="radio"/> |
| Bruising of skin                                                                      | <input type="radio"/> | <input type="radio"/> | <input type="radio"/> | <input type="radio"/> | <input type="radio"/> |
| Calf cramps                                                                           | <input type="radio"/> | <input type="radio"/> | <input type="radio"/> | <input type="radio"/> | <input type="radio"/> |
| Change in nails (i.e. white spots, brittleness, change in moons)                      | <input type="radio"/> | <input type="radio"/> | <input type="radio"/> | <input type="radio"/> | <input type="radio"/> |
| Changes in voice                                                                      | <input type="radio"/> | <input type="radio"/> | <input type="radio"/> | <input type="radio"/> | <input type="radio"/> |
| Changed sense of taste                                                                | <input type="radio"/> | <input type="radio"/> | <input type="radio"/> | <input type="radio"/> | <input type="radio"/> |
| Chills but no fever                                                                   | <input type="radio"/> | <input type="radio"/> | <input type="radio"/> | <input type="radio"/> | <input type="radio"/> |
| Clogged ears                                                                          | <input type="radio"/> | <input type="radio"/> | <input type="radio"/> | <input type="radio"/> | <input type="radio"/> |
| Cold burning feeling in lungs                                                         | <input type="radio"/> | <input type="radio"/> | <input type="radio"/> | <input type="radio"/> | <input type="radio"/> |
| Confusion                                                                             | <input type="radio"/> | <input type="radio"/> | <input type="radio"/> | <input type="radio"/> | <input type="radio"/> |
| Congested or runny nose                                                               | <input type="radio"/> | <input type="radio"/> | <input type="radio"/> | <input type="radio"/> | <input type="radio"/> |
| Constant thirst                                                                       | <input type="radio"/> | <input type="radio"/> | <input type="radio"/> | <input type="radio"/> | <input type="radio"/> |
| Costochondritis (inflammation of the cartilage that connects a rib to the breastbone) | <input type="radio"/> | <input type="radio"/> | <input type="radio"/> | <input type="radio"/> | <input type="radio"/> |
| Cough                                                                                 | <input type="radio"/> | <input type="radio"/> | <input type="radio"/> | <input type="radio"/> | <input type="radio"/> |
| Coughing up blood                                                                     | <input type="radio"/> | <input type="radio"/> | <input type="radio"/> | <input type="radio"/> | <input type="radio"/> |
| Covid toes (tender or itchy rash or chilblains on the toes or foot)                   | <input type="radio"/> | <input type="radio"/> | <input type="radio"/> | <input type="radio"/> | <input type="radio"/> |

|                                                                                             |                       |                       |                       |                       |                       |
|---------------------------------------------------------------------------------------------|-----------------------|-----------------------|-----------------------|-----------------------|-----------------------|
| Cracked or dry lips                                                                         | <input type="radio"/> | <input type="radio"/> | <input type="radio"/> | <input type="radio"/> | <input type="radio"/> |
| Dental problems (i.e. chipped tooth, tooth loss)                                            | <input type="radio"/> | <input type="radio"/> | <input type="radio"/> | <input type="radio"/> | <input type="radio"/> |
| Diarrhea                                                                                    | <input type="radio"/> | <input type="radio"/> | <input type="radio"/> | <input type="radio"/> | <input type="radio"/> |
| Difficulty concentrating or focusing                                                        | <input type="radio"/> | <input type="radio"/> | <input type="radio"/> | <input type="radio"/> | <input type="radio"/> |
| Difficulty sleeping                                                                         | <input type="radio"/> | <input type="radio"/> | <input type="radio"/> | <input type="radio"/> | <input type="radio"/> |
| Difficulty speaking properly                                                                | <input type="radio"/> | <input type="radio"/> | <input type="radio"/> | <input type="radio"/> | <input type="radio"/> |
| Discoloration of the skin (for example: purple or blue on the hands or feet, no blistering) | <input type="radio"/> | <input type="radio"/> | <input type="radio"/> | <input type="radio"/> | <input type="radio"/> |
| Dizziness                                                                                   | <input type="radio"/> | <input type="radio"/> | <input type="radio"/> | <input type="radio"/> | <input type="radio"/> |
| Dry eyes                                                                                    | <input type="radio"/> | <input type="radio"/> | <input type="radio"/> | <input type="radio"/> | <input type="radio"/> |
| Dry or peeling skin                                                                         | <input type="radio"/> | <input type="radio"/> | <input type="radio"/> | <input type="radio"/> | <input type="radio"/> |
| Dry scalp or dandruff                                                                       | <input type="radio"/> | <input type="radio"/> | <input type="radio"/> | <input type="radio"/> | <input type="radio"/> |
| Dry throat                                                                                  | <input type="radio"/> | <input type="radio"/> | <input type="radio"/> | <input type="radio"/> | <input type="radio"/> |
| Ear pain/earache                                                                            | <input type="radio"/> | <input type="radio"/> | <input type="radio"/> | <input type="radio"/> | <input type="radio"/> |
| Elevated thyroid hormones                                                                   | <input type="radio"/> | <input type="radio"/> | <input type="radio"/> | <input type="radio"/> | <input type="radio"/> |
| Extreme pressure at base of head or occipital nerve                                         | <input type="radio"/> | <input type="radio"/> | <input type="radio"/> | <input type="radio"/> | <input type="radio"/> |
| Eye stye or infection                                                                       | <input type="radio"/> | <input type="radio"/> | <input type="radio"/> | <input type="radio"/> | <input type="radio"/> |
| Fatigue                                                                                     | <input type="radio"/> | <input type="radio"/> | <input type="radio"/> | <input type="radio"/> | <input type="radio"/> |
| Feeling irritable                                                                           | <input type="radio"/> | <input type="radio"/> | <input type="radio"/> | <input type="radio"/> | <input type="radio"/> |
| Feeling of burning skin                                                                     | <input type="radio"/> | <input type="radio"/> | <input type="radio"/> | <input type="radio"/> | <input type="radio"/> |
| Fever or chills                                                                             | <input type="radio"/> | <input type="radio"/> | <input type="radio"/> | <input type="radio"/> | <input type="radio"/> |
| Floaters or flashes of light in vision                                                      | <input type="radio"/> | <input type="radio"/> | <input type="radio"/> | <input type="radio"/> | <input type="radio"/> |
| Foot pain                                                                                   | <input type="radio"/> | <input type="radio"/> | <input type="radio"/> | <input type="radio"/> | <input type="radio"/> |
| GERD (acid reflux) with excessive salivation                                                | <input type="radio"/> | <input type="radio"/> | <input type="radio"/> | <input type="radio"/> | <input type="radio"/> |
| Goiter or lump in throat                                                                    | <input type="radio"/> | <input type="radio"/> | <input type="radio"/> | <input type="radio"/> | <input type="radio"/> |
| Hair loss                                                                                   | <input type="radio"/> | <input type="radio"/> | <input type="radio"/> | <input type="radio"/> | <input type="radio"/> |
| Hand or wrist pain                                                                          | <input type="radio"/> | <input type="radio"/> | <input type="radio"/> | <input type="radio"/> | <input type="radio"/> |
| Headache                                                                                    | <input type="radio"/> | <input type="radio"/> | <input type="radio"/> | <input type="radio"/> | <input type="radio"/> |
| Heart palpitations (heart skipping a beat or racing)                                        | <input type="radio"/> | <input type="radio"/> | <input type="radio"/> | <input type="radio"/> | <input type="radio"/> |
| Heat intolerance                                                                            | <input type="radio"/> | <input type="radio"/> | <input type="radio"/> | <input type="radio"/> | <input type="radio"/> |
| High blood pressure                                                                         | <input type="radio"/> | <input type="radio"/> | <input type="radio"/> | <input type="radio"/> | <input type="radio"/> |
| Hormone imbalances                                                                          | <input type="radio"/> | <input type="radio"/> | <input type="radio"/> | <input type="radio"/> | <input type="radio"/> |
| "Hot" blood rush                                                                            | <input type="radio"/> | <input type="radio"/> | <input type="radio"/> | <input type="radio"/> | <input type="radio"/> |
| Inability to cry                                                                            | <input type="radio"/> | <input type="radio"/> | <input type="radio"/> | <input type="radio"/> | <input type="radio"/> |

|                                                             |                       |                       |                       |                       |                       |
|-------------------------------------------------------------|-----------------------|-----------------------|-----------------------|-----------------------|-----------------------|
| Inability to exercise or be active                          | <input type="radio"/> | <input type="radio"/> | <input type="radio"/> | <input type="radio"/> | <input type="radio"/> |
| Inability to yawn                                           | <input type="radio"/> | <input type="radio"/> | <input type="radio"/> | <input type="radio"/> | <input type="radio"/> |
| Internal tremors or buzzing/vibration                       | <input type="radio"/> | <input type="radio"/> | <input type="radio"/> | <input type="radio"/> | <input type="radio"/> |
| Irregular or skipped menstrual cycles                       | <input type="radio"/> | <input type="radio"/> | <input type="radio"/> | <input type="radio"/> | <input type="radio"/> |
| Jaw pain                                                    | <input type="radio"/> | <input type="radio"/> | <input type="radio"/> | <input type="radio"/> | <input type="radio"/> |
| Joint pain                                                  | <input type="radio"/> | <input type="radio"/> | <input type="radio"/> | <input type="radio"/> | <input type="radio"/> |
| Kidney issues or protein in urine                           | <input type="radio"/> | <input type="radio"/> | <input type="radio"/> | <input type="radio"/> | <input type="radio"/> |
| Kidney pain                                                 | <input type="radio"/> | <input type="radio"/> | <input type="radio"/> | <input type="radio"/> | <input type="radio"/> |
| Low blood oxygen                                            | <input type="radio"/> | <input type="radio"/> | <input type="radio"/> | <input type="radio"/> | <input type="radio"/> |
| Low blood pressure                                          | <input type="radio"/> | <input type="radio"/> | <input type="radio"/> | <input type="radio"/> | <input type="radio"/> |
| Lower back pain                                             | <input type="radio"/> | <input type="radio"/> | <input type="radio"/> | <input type="radio"/> | <input type="radio"/> |
| Loss of appetite                                            | <input type="radio"/> | <input type="radio"/> | <input type="radio"/> | <input type="radio"/> | <input type="radio"/> |
| Loss of hearing                                             | <input type="radio"/> | <input type="radio"/> | <input type="radio"/> | <input type="radio"/> | <input type="radio"/> |
| Loss or decrease in quality of vision                       | <input type="radio"/> | <input type="radio"/> | <input type="radio"/> | <input type="radio"/> | <input type="radio"/> |
| Lump in throat/difficulty swallowing                        | <input type="radio"/> | <input type="radio"/> | <input type="radio"/> | <input type="radio"/> | <input type="radio"/> |
| Memory problems                                             | <input type="radio"/> | <input type="radio"/> | <input type="radio"/> | <input type="radio"/> | <input type="radio"/> |
| Menstrual cycles that are heavier or lighter than normal    | <input type="radio"/> | <input type="radio"/> | <input type="radio"/> | <input type="radio"/> | <input type="radio"/> |
| Mid-back pain at base of ribs                               | <input type="radio"/> | <input type="radio"/> | <input type="radio"/> | <input type="radio"/> | <input type="radio"/> |
| Mouth sores or sore tongue                                  | <input type="radio"/> | <input type="radio"/> | <input type="radio"/> | <input type="radio"/> | <input type="radio"/> |
| Muscle or body aches                                        | <input type="radio"/> | <input type="radio"/> | <input type="radio"/> | <input type="radio"/> | <input type="radio"/> |
| Muscle twitching                                            | <input type="radio"/> | <input type="radio"/> | <input type="radio"/> | <input type="radio"/> | <input type="radio"/> |
| Nausea or vomiting                                          | <input type="radio"/> | <input type="radio"/> | <input type="radio"/> | <input type="radio"/> | <input type="radio"/> |
| Neck muscle pain                                            | <input type="radio"/> | <input type="radio"/> | <input type="radio"/> | <input type="radio"/> | <input type="radio"/> |
| Nerve pain                                                  | <input type="radio"/> | <input type="radio"/> | <input type="radio"/> | <input type="radio"/> | <input type="radio"/> |
| Nerve sensations (tingling, pins and needles, numbness)     | <input type="radio"/> | <input type="radio"/> | <input type="radio"/> | <input type="radio"/> | <input type="radio"/> |
| Neuropathy in feet and hands (weakness, numbness, and pain) | <input type="radio"/> | <input type="radio"/> | <input type="radio"/> | <input type="radio"/> | <input type="radio"/> |
| New allergies                                               | <input type="radio"/> | <input type="radio"/> | <input type="radio"/> | <input type="radio"/> | <input type="radio"/> |
| Night sweats                                                | <input type="radio"/> | <input type="radio"/> | <input type="radio"/> | <input type="radio"/> | <input type="radio"/> |
| Nightmares                                                  | <input type="radio"/> | <input type="radio"/> | <input type="radio"/> | <input type="radio"/> | <input type="radio"/> |
| Painful scalp                                               | <input type="radio"/> | <input type="radio"/> | <input type="radio"/> | <input type="radio"/> | <input type="radio"/> |
| Partial or complete loss of sense of smell                  | <input type="radio"/> | <input type="radio"/> | <input type="radio"/> | <input type="radio"/> | <input type="radio"/> |
| Partial or complete loss of sense of taste                  | <input type="radio"/> | <input type="radio"/> | <input type="radio"/> | <input type="radio"/> | <input type="radio"/> |

|                                                                                       |                       |                       |                       |                       |                       |
|---------------------------------------------------------------------------------------|-----------------------|-----------------------|-----------------------|-----------------------|-----------------------|
| Persistent chest pain or pressure                                                     | <input type="radio"/> | <input type="radio"/> | <input type="radio"/> | <input type="radio"/> | <input type="radio"/> |
| Personality change (drastic)                                                          | <input type="radio"/> | <input type="radio"/> | <input type="radio"/> | <input type="radio"/> | <input type="radio"/> |
| Petechiae (pinpoint rash)                                                             | <input type="radio"/> | <input type="radio"/> | <input type="radio"/> | <input type="radio"/> | <input type="radio"/> |
| Phantom smells                                                                        | <input type="radio"/> | <input type="radio"/> | <input type="radio"/> | <input type="radio"/> | <input type="radio"/> |
| Phlegm in back of throat                                                              | <input type="radio"/> | <input type="radio"/> | <input type="radio"/> | <input type="radio"/> | <input type="radio"/> |
| Post-exertional malaise<br>(worsened symptoms or flu-like<br>symptoms after exertion) | <input type="radio"/> | <input type="radio"/> | <input type="radio"/> | <input type="radio"/> | <input type="radio"/> |
| Postnasal drip                                                                        | <input type="radio"/> | <input type="radio"/> | <input type="radio"/> | <input type="radio"/> | <input type="radio"/> |
| Rash                                                                                  | <input type="radio"/> | <input type="radio"/> | <input type="radio"/> | <input type="radio"/> | <input type="radio"/> |
| Reflux or heartburn                                                                   | <input type="radio"/> | <input type="radio"/> | <input type="radio"/> | <input type="radio"/> | <input type="radio"/> |
| Runny nose                                                                            | <input type="radio"/> | <input type="radio"/> | <input type="radio"/> | <input type="radio"/> | <input type="radio"/> |
| Sadness                                                                               | <input type="radio"/> | <input type="radio"/> | <input type="radio"/> | <input type="radio"/> | <input type="radio"/> |
| Seizures                                                                              | <input type="radio"/> | <input type="radio"/> | <input type="radio"/> | <input type="radio"/> | <input type="radio"/> |
| Sharp or sudden chest pain                                                            | <input type="radio"/> | <input type="radio"/> | <input type="radio"/> | <input type="radio"/> | <input type="radio"/> |
| Shortness of breath or difficulty<br>breathing                                        | <input type="radio"/> | <input type="radio"/> | <input type="radio"/> | <input type="radio"/> | <input type="radio"/> |
| Shortness of breath or<br>exhaustion from bending over                                | <input type="radio"/> | <input type="radio"/> | <input type="radio"/> | <input type="radio"/> | <input type="radio"/> |
| Sleeping more than normal                                                             | <input type="radio"/> | <input type="radio"/> | <input type="radio"/> | <input type="radio"/> | <input type="radio"/> |
| Sore throat                                                                           | <input type="radio"/> | <input type="radio"/> | <input type="radio"/> | <input type="radio"/> | <input type="radio"/> |
| Spinal issues                                                                         | <input type="radio"/> | <input type="radio"/> | <input type="radio"/> | <input type="radio"/> | <input type="radio"/> |
| Spikes in blood pressure                                                              | <input type="radio"/> | <input type="radio"/> | <input type="radio"/> | <input type="radio"/> | <input type="radio"/> |
| Swollen hands or feet                                                                 | <input type="radio"/> | <input type="radio"/> | <input type="radio"/> | <input type="radio"/> | <input type="radio"/> |
| Swollen lymph nodes                                                                   | <input type="radio"/> | <input type="radio"/> | <input type="radio"/> | <input type="radio"/> | <input type="radio"/> |
| Syncope (fainting)                                                                    | <input type="radio"/> | <input type="radio"/> | <input type="radio"/> | <input type="radio"/> | <input type="radio"/> |
| Tachycardia (rapid heartbeat) at<br>rest                                              | <input type="radio"/> | <input type="radio"/> | <input type="radio"/> | <input type="radio"/> | <input type="radio"/> |
| Tachycardia (rapid heartbeat)<br>after standing up                                    | <input type="radio"/> | <input type="radio"/> | <input type="radio"/> | <input type="radio"/> | <input type="radio"/> |
| Thrush (white fungal infection in<br>the mouth or throat)                             | <input type="radio"/> | <input type="radio"/> | <input type="radio"/> | <input type="radio"/> | <input type="radio"/> |
| Tinnitus or humming in ears                                                           | <input type="radio"/> | <input type="radio"/> | <input type="radio"/> | <input type="radio"/> | <input type="radio"/> |
| Tremors or shakiness                                                                  | <input type="radio"/> | <input type="radio"/> | <input type="radio"/> | <input type="radio"/> | <input type="radio"/> |
| Upper back pain                                                                       | <input type="radio"/> | <input type="radio"/> | <input type="radio"/> | <input type="radio"/> | <input type="radio"/> |
| UTI (urinary tract infection)                                                         | <input type="radio"/> | <input type="radio"/> | <input type="radio"/> | <input type="radio"/> | <input type="radio"/> |
| Weakened neck                                                                         | <input type="radio"/> | <input type="radio"/> | <input type="radio"/> | <input type="radio"/> | <input type="radio"/> |
| Weight gain                                                                           | <input type="radio"/> | <input type="radio"/> | <input type="radio"/> | <input type="radio"/> | <input type="radio"/> |

---

What treatments (medicine, therapy, vitamins, body positioning, at-home care, etc.) have you found effective for reducing your symptoms, if any?

---

---

|                                                         | 76-100% of health<br>before COVID-19 | 51-75% of health<br>before COVID-19 | 26-50% of health<br>before COVID-19 | 0-25% of health<br>before COVID-19 |
|---------------------------------------------------------|--------------------------------------|-------------------------------------|-------------------------------------|------------------------------------|
| On your best days, would you<br>say you that you are at | <input type="radio"/>                | <input type="radio"/>               | <input type="radio"/>               | <input type="radio"/>              |
| On your worst days, would you<br>say that you are at    | <input type="radio"/>                | <input type="radio"/>               | <input type="radio"/>               | <input type="radio"/>              |

---

Please, in the space below, share any information about your experience with COVID that we might have missed.

---



# Vaccine Verification [old]

Fill this out once you have confirmed that participant has received vaccine.

928) Study Coordinator First Name

---

929) Study Coordinator Last Name

---

930) Today's date

---

931) Participant First Name

---

932) Participant Last Name

---

933) On what date did participant receive first dose of vaccine?

---

934) Has participant confirmed receiving vaccine

Yes

# Study Visit 1 Complete

Please complete the survey below as soon as a participant has completed the first study visit.

Thank you!

---

935) Study Coordinator First Name

---

---

936) Study Coordinator Last Name

---

---

937) Participant First Name

---

---

938) Participant Last Name

---

---

939) Has the participant completed the first study visit?

- Yes
- No

---

940) Please enter the date of the completed first study visit.

---

# Participant Vaccine Verification

Please complete the survey below once you have received the first dose of a Covid-19 vaccine.

Thank you!

---

941) Please enter your first name

---

---

942) Please enter your last name

---

---

943) Please enter the date you received the first dose of the Covid-19 vaccine

---

---

944) Please select the vaccine type you received

- Pfizer
- Moderna
- Johnson & Johnson (J&J)
- Other

## Survey 2

Thank you for taking Survey 2 for the Yale COVID Recovery Study!

Please remember that you may stop this survey and come back to it at any point. To return to the survey, please return to the link in your browser (or relick the link in your email).

You may also find it helpful to have the below items ready as you complete the survey. If you do not have these items, please still fill in the information as best you can.

Testing results: dates, type (PCR, antigen) and result of tests. If you do not remember the exact date, the estimated date is enough. Symptom time and severity: your symptom log. You will be asked to pick symptoms you have had since you began having COVID-19 symptoms.

---

Please verify that you received the first dose of your vaccine on [vaccine\_arm\_1][v\_v\_vax\_date]

- This is correct  
 This is not correct \_\_\_\_\_

---

On what date did you receive the first dose of your COVID-19 vaccine?

\_\_\_\_\_

---

Which COVID-19 vaccine did you receive?

- Pfizer-BioNTech  
 Moderna  
 Johnson & Johnson  
 AstraZeneca or Covishield  
 Other  
 Don't know

---

Have you received your second dose of the vaccine?

- Yes \_\_\_\_\_  
 No, but it's scheduled  
 No, and I don't have an appointment scheduled  
 No, but the vaccine I received requires only 1 dose

---

When did you receive your second dose of the COVID-19 vaccine?

\_\_\_\_\_

---

Before you received the vaccine, you completed Survey 1 and marked the symptoms that you had experienced. Now, we will ask you a series of questions about these symptoms, and how they have changed (if at all). Please answer these questions based on your experience since you received the COVID-19 vaccine, or for the time period from [vaccine\_arm\_1][v\_v\_vax\_date] until now.

**Since [vaccine\_arm\_1][v\_v\_vax\_date], this symptom has been**

|                                                                                       | Better                | Worse                 | The same              |
|---------------------------------------------------------------------------------------|-----------------------|-----------------------|-----------------------|
| Abdominal pain                                                                        | <input type="radio"/> | <input type="radio"/> | <input type="radio"/> |
| Abnormally low temperature                                                            | <input type="radio"/> | <input type="radio"/> | <input type="radio"/> |
| Acid reflux                                                                           | <input type="radio"/> | <input type="radio"/> | <input type="radio"/> |
| Afternoon or evening fevers/low-grade fevers                                          | <input type="radio"/> | <input type="radio"/> | <input type="radio"/> |
| Anemia (low number of red blood cells)                                                | <input type="radio"/> | <input type="radio"/> | <input type="radio"/> |
| Anxiety                                                                               | <input type="radio"/> | <input type="radio"/> | <input type="radio"/> |
| Arrhythmia (improper beating of the heart due to electrical impulse problems)         | <input type="radio"/> | <input type="radio"/> | <input type="radio"/> |
| Bilateral neck throbbing around lymph nodes                                           | <input type="radio"/> | <input type="radio"/> | <input type="radio"/> |
| Blurry vision                                                                         | <input type="radio"/> | <input type="radio"/> | <input type="radio"/> |
| Bone aches in extremities                                                             | <input type="radio"/> | <input type="radio"/> | <input type="radio"/> |
| Brain fog                                                                             | <input type="radio"/> | <input type="radio"/> | <input type="radio"/> |
| Brain pressure                                                                        | <input type="radio"/> | <input type="radio"/> | <input type="radio"/> |
| Bulging veins                                                                         | <input type="radio"/> | <input type="radio"/> | <input type="radio"/> |
| Burning sensations                                                                    | <input type="radio"/> | <input type="radio"/> | <input type="radio"/> |
| Bruising of skin                                                                      | <input type="radio"/> | <input type="radio"/> | <input type="radio"/> |
| Calf cramps                                                                           | <input type="radio"/> | <input type="radio"/> | <input type="radio"/> |
| Change in nails (i.e. white spots, brittleness, change in moons)                      | <input type="radio"/> | <input type="radio"/> | <input type="radio"/> |
| Changes in voice                                                                      | <input type="radio"/> | <input type="radio"/> | <input type="radio"/> |
| Changed sense of taste                                                                | <input type="radio"/> | <input type="radio"/> | <input type="radio"/> |
| Chills but no fever                                                                   | <input type="radio"/> | <input type="radio"/> | <input type="radio"/> |
| Clogged ears                                                                          | <input type="radio"/> | <input type="radio"/> | <input type="radio"/> |
| Cold burning feeling in lungs                                                         | <input type="radio"/> | <input type="radio"/> | <input type="radio"/> |
| Confusion                                                                             | <input type="radio"/> | <input type="radio"/> | <input type="radio"/> |
| Congested or runny nose                                                               | <input type="radio"/> | <input type="radio"/> | <input type="radio"/> |
| Constant thirst                                                                       | <input type="radio"/> | <input type="radio"/> | <input type="radio"/> |
| Costochondritis (inflammation of the cartilage that connects a rib to the breastbone) | <input type="radio"/> | <input type="radio"/> | <input type="radio"/> |
| Cough                                                                                 | <input type="radio"/> | <input type="radio"/> | <input type="radio"/> |
| Coughing up blood                                                                     | <input type="radio"/> | <input type="radio"/> | <input type="radio"/> |
| Covid toes (tender or itchy rash or chilblains on the toes or foot)                   | <input type="radio"/> | <input type="radio"/> | <input type="radio"/> |

|                                                                                             |                       |                       |                       |
|---------------------------------------------------------------------------------------------|-----------------------|-----------------------|-----------------------|
| Cracked or dry lips                                                                         | <input type="radio"/> | <input type="radio"/> | <input type="radio"/> |
| Dental problems (i.e. chipped tooth, tooth loss)                                            | <input type="radio"/> | <input type="radio"/> | <input type="radio"/> |
| Diarrhea                                                                                    | <input type="radio"/> | <input type="radio"/> | <input type="radio"/> |
| Difficulty concentrating or focusing                                                        | <input type="radio"/> | <input type="radio"/> | <input type="radio"/> |
| Difficulty sleeping                                                                         | <input type="radio"/> | <input type="radio"/> | <input type="radio"/> |
| Difficulty speaking properly                                                                | <input type="radio"/> | <input type="radio"/> | <input type="radio"/> |
| Discoloration of the skin (for example: purple or blue on the hands or feet, no blistering) | <input type="radio"/> | <input type="radio"/> | <input type="radio"/> |
| Dizziness                                                                                   | <input type="radio"/> | <input type="radio"/> | <input type="radio"/> |
| Dry eyes                                                                                    | <input type="radio"/> | <input type="radio"/> | <input type="radio"/> |
| Dry or peeling skin                                                                         | <input type="radio"/> | <input type="radio"/> | <input type="radio"/> |
| Dry scalp or dandruff                                                                       | <input type="radio"/> | <input type="radio"/> | <input type="radio"/> |
| Dry throat                                                                                  | <input type="radio"/> | <input type="radio"/> | <input type="radio"/> |
| Ear pain/earache                                                                            | <input type="radio"/> | <input type="radio"/> | <input type="radio"/> |
| Elevated thyroid hormones                                                                   | <input type="radio"/> | <input type="radio"/> | <input type="radio"/> |
| Extreme pressure at base of head or occipital nerve                                         | <input type="radio"/> | <input type="radio"/> | <input type="radio"/> |
| Eye stye or infection                                                                       | <input type="radio"/> | <input type="radio"/> | <input type="radio"/> |
| Fatigue                                                                                     | <input type="radio"/> | <input type="radio"/> | <input type="radio"/> |
| Feeling irritable                                                                           | <input type="radio"/> | <input type="radio"/> | <input type="radio"/> |
| Feeling of burning skin                                                                     | <input type="radio"/> | <input type="radio"/> | <input type="radio"/> |
| Fever or chills                                                                             | <input type="radio"/> | <input type="radio"/> | <input type="radio"/> |
| Floaters or flashes of light in vision                                                      | <input type="radio"/> | <input type="radio"/> | <input type="radio"/> |
| Foot pain                                                                                   | <input type="radio"/> | <input type="radio"/> | <input type="radio"/> |
| GERD (acid reflux) with excessive salivation                                                | <input type="radio"/> | <input type="radio"/> | <input type="radio"/> |
| Goiter or lump in throat                                                                    | <input type="radio"/> | <input type="radio"/> | <input type="radio"/> |
| Hair loss                                                                                   | <input type="radio"/> | <input type="radio"/> | <input type="radio"/> |
| Hand or wrist pain                                                                          | <input type="radio"/> | <input type="radio"/> | <input type="radio"/> |
| Headache                                                                                    | <input type="radio"/> | <input type="radio"/> | <input type="radio"/> |
| Heart palpitations (heart skipping a beat or racing)                                        | <input type="radio"/> | <input type="radio"/> | <input type="radio"/> |
| Heat intolerance                                                                            | <input type="radio"/> | <input type="radio"/> | <input type="radio"/> |
| High blood pressure                                                                         | <input type="radio"/> | <input type="radio"/> | <input type="radio"/> |
| Hormone imbalances                                                                          | <input type="radio"/> | <input type="radio"/> | <input type="radio"/> |
| "Hot" blood rush                                                                            | <input type="radio"/> | <input type="radio"/> | <input type="radio"/> |
| Inability to cry                                                                            | <input type="radio"/> | <input type="radio"/> | <input type="radio"/> |

|                                                             |                       |                       |                       |
|-------------------------------------------------------------|-----------------------|-----------------------|-----------------------|
| Inability to exercise or be active                          | <input type="radio"/> | <input type="radio"/> | <input type="radio"/> |
| Inability to yawn                                           | <input type="radio"/> | <input type="radio"/> | <input type="radio"/> |
| Internal tremors or buzzing/vibration                       | <input type="radio"/> | <input type="radio"/> | <input type="radio"/> |
| Irregular or skipped menstrual cycles                       | <input type="radio"/> | <input type="radio"/> | <input type="radio"/> |
| Jaw pain                                                    | <input type="radio"/> | <input type="radio"/> | <input type="radio"/> |
| Joint pain                                                  | <input type="radio"/> | <input type="radio"/> | <input type="radio"/> |
| Kidney issues or protein in urine                           | <input type="radio"/> | <input type="radio"/> | <input type="radio"/> |
| Kidney pain                                                 | <input type="radio"/> | <input type="radio"/> | <input type="radio"/> |
| Low blood oxygen                                            | <input type="radio"/> | <input type="radio"/> | <input type="radio"/> |
| Low blood pressure                                          | <input type="radio"/> | <input type="radio"/> | <input type="radio"/> |
| Lower back pain                                             | <input type="radio"/> | <input type="radio"/> | <input type="radio"/> |
| Loss of appetite                                            | <input type="radio"/> | <input type="radio"/> | <input type="radio"/> |
| Loss of hearing                                             | <input type="radio"/> | <input type="radio"/> | <input type="radio"/> |
| Loss or decrease in quality of vision                       | <input type="radio"/> | <input type="radio"/> | <input type="radio"/> |
| Lump in throat/difficulty swallowing                        | <input type="radio"/> | <input type="radio"/> | <input type="radio"/> |
| Memory problems                                             | <input type="radio"/> | <input type="radio"/> | <input type="radio"/> |
| Menstrual cycles that are heavier or lighter than normal    | <input type="radio"/> | <input type="radio"/> | <input type="radio"/> |
| Mid-back pain at base of ribs                               | <input type="radio"/> | <input type="radio"/> | <input type="radio"/> |
| Mouth sores or sore tongue                                  | <input type="radio"/> | <input type="radio"/> | <input type="radio"/> |
| Muscle or body aches                                        | <input type="radio"/> | <input type="radio"/> | <input type="radio"/> |
| Muscle twitching                                            | <input type="radio"/> | <input type="radio"/> | <input type="radio"/> |
| Nausea or vomiting                                          | <input type="radio"/> | <input type="radio"/> | <input type="radio"/> |
| Neck muscle pain                                            | <input type="radio"/> | <input type="radio"/> | <input type="radio"/> |
| Nerve pain                                                  | <input type="radio"/> | <input type="radio"/> | <input type="radio"/> |
| Nerve sensations (tingling, pins and needles, numbness)     | <input type="radio"/> | <input type="radio"/> | <input type="radio"/> |
| Neuropathy in feet and hands (weakness, numbness, and pain) | <input type="radio"/> | <input type="radio"/> | <input type="radio"/> |
| New allergies                                               | <input type="radio"/> | <input type="radio"/> | <input type="radio"/> |
| Night sweats                                                | <input type="radio"/> | <input type="radio"/> | <input type="radio"/> |
| Nightmares                                                  | <input type="radio"/> | <input type="radio"/> | <input type="radio"/> |
| Painful scalp                                               | <input type="radio"/> | <input type="radio"/> | <input type="radio"/> |
| Partial or complete loss of sense of smell                  | <input type="radio"/> | <input type="radio"/> | <input type="radio"/> |
| Partial or complete loss of sense of taste                  | <input type="radio"/> | <input type="radio"/> | <input type="radio"/> |

|                                                                                       |                       |                       |                       |
|---------------------------------------------------------------------------------------|-----------------------|-----------------------|-----------------------|
| Persistent chest pain or pressure                                                     | <input type="radio"/> | <input type="radio"/> | <input type="radio"/> |
| Personality change (drastic)                                                          | <input type="radio"/> | <input type="radio"/> | <input type="radio"/> |
| Petechiae (pinpoint rash)                                                             | <input type="radio"/> | <input type="radio"/> | <input type="radio"/> |
| Phantom smells                                                                        | <input type="radio"/> | <input type="radio"/> | <input type="radio"/> |
| Phlegm in back of throat                                                              | <input type="radio"/> | <input type="radio"/> | <input type="radio"/> |
| Post-exertional malaise<br>(worsened symptoms or flu-like<br>symptoms after exertion) | <input type="radio"/> | <input type="radio"/> | <input type="radio"/> |
| Postnasal drip                                                                        | <input type="radio"/> | <input type="radio"/> | <input type="radio"/> |
| Rash                                                                                  | <input type="radio"/> | <input type="radio"/> | <input type="radio"/> |
| Reflux or heartburn                                                                   | <input type="radio"/> | <input type="radio"/> | <input type="radio"/> |
| Runny nose                                                                            | <input type="radio"/> | <input type="radio"/> | <input type="radio"/> |
| Sadness                                                                               | <input type="radio"/> | <input type="radio"/> | <input type="radio"/> |
| Seizures                                                                              | <input type="radio"/> | <input type="radio"/> | <input type="radio"/> |
| Sharp or sudden chest pain                                                            | <input type="radio"/> | <input type="radio"/> | <input type="radio"/> |
| Shortness of breath or difficulty<br>breathing                                        | <input type="radio"/> | <input type="radio"/> | <input type="radio"/> |
| Shortness of breath or<br>exhaustion from bending over                                | <input type="radio"/> | <input type="radio"/> | <input type="radio"/> |
| Sleeping more than normal                                                             | <input type="radio"/> | <input type="radio"/> | <input type="radio"/> |
| Sore throat                                                                           | <input type="radio"/> | <input type="radio"/> | <input type="radio"/> |
| Spinal issues                                                                         | <input type="radio"/> | <input type="radio"/> | <input type="radio"/> |
| Spikes in blood pressure                                                              | <input type="radio"/> | <input type="radio"/> | <input type="radio"/> |
| Swollen hands or feet                                                                 | <input type="radio"/> | <input type="radio"/> | <input type="radio"/> |
| Swollen lymph nodes                                                                   | <input type="radio"/> | <input type="radio"/> | <input type="radio"/> |
| Syncope (fainting)                                                                    | <input type="radio"/> | <input type="radio"/> | <input type="radio"/> |
| Tachycardia (rapid heartbeat) at<br>rest                                              | <input type="radio"/> | <input type="radio"/> | <input type="radio"/> |
| Tachycardia (rapid heartbeat)<br>after standing up                                    | <input type="radio"/> | <input type="radio"/> | <input type="radio"/> |
| Thrush (white fungal infection in<br>the mouth or throat)                             | <input type="radio"/> | <input type="radio"/> | <input type="radio"/> |
| Tinnitus or humming in ears                                                           | <input type="radio"/> | <input type="radio"/> | <input type="radio"/> |
| Tremors or shakiness                                                                  | <input type="radio"/> | <input type="radio"/> | <input type="radio"/> |
| Upper back pain                                                                       | <input type="radio"/> | <input type="radio"/> | <input type="radio"/> |
| UTI (urinary tract infection)                                                         | <input type="radio"/> | <input type="radio"/> | <input type="radio"/> |
| Weakened neck                                                                         | <input type="radio"/> | <input type="radio"/> | <input type="radio"/> |
| Weight gain                                                                           | <input type="radio"/> | <input type="radio"/> | <input type="radio"/> |



**Since [vaccine\_arm\_1][v\_v\_vax\_date], I have experienced this symptom, on average**

|                                                                                       | Never--it has gone away completely | Once a month          | Once or twice a week  | 3 or 4 times a week   | Most days             | All the time          |
|---------------------------------------------------------------------------------------|------------------------------------|-----------------------|-----------------------|-----------------------|-----------------------|-----------------------|
| Abdominal pain                                                                        | <input type="radio"/>              | <input type="radio"/> | <input type="radio"/> | <input type="radio"/> | <input type="radio"/> | <input type="radio"/> |
| Abnormally low temperature                                                            | <input type="radio"/>              | <input type="radio"/> | <input type="radio"/> | <input type="radio"/> | <input type="radio"/> | <input type="radio"/> |
| Acid reflux                                                                           | <input type="radio"/>              | <input type="radio"/> | <input type="radio"/> | <input type="radio"/> | <input type="radio"/> | <input type="radio"/> |
| Afternoon or evening fevers/low-grade fevers                                          | <input type="radio"/>              | <input type="radio"/> | <input type="radio"/> | <input type="radio"/> | <input type="radio"/> | <input type="radio"/> |
| Anemia (low number of red blood cells)                                                | <input type="radio"/>              | <input type="radio"/> | <input type="radio"/> | <input type="radio"/> | <input type="radio"/> | <input type="radio"/> |
| Anxiety                                                                               | <input type="radio"/>              | <input type="radio"/> | <input type="radio"/> | <input type="radio"/> | <input type="radio"/> | <input type="radio"/> |
| Arrhythmia (improper beating of the heart due to electrical impulse problems)         | <input type="radio"/>              | <input type="radio"/> | <input type="radio"/> | <input type="radio"/> | <input type="radio"/> | <input type="radio"/> |
| Bilateral neck throbbing around lymph nodes                                           | <input type="radio"/>              | <input type="radio"/> | <input type="radio"/> | <input type="radio"/> | <input type="radio"/> | <input type="radio"/> |
| Blurry vision                                                                         | <input type="radio"/>              | <input type="radio"/> | <input type="radio"/> | <input type="radio"/> | <input type="radio"/> | <input type="radio"/> |
| Bone aches in extremities                                                             | <input type="radio"/>              | <input type="radio"/> | <input type="radio"/> | <input type="radio"/> | <input type="radio"/> | <input type="radio"/> |
| Brain fog                                                                             | <input type="radio"/>              | <input type="radio"/> | <input type="radio"/> | <input type="radio"/> | <input type="radio"/> | <input type="radio"/> |
| Brain pressure                                                                        | <input type="radio"/>              | <input type="radio"/> | <input type="radio"/> | <input type="radio"/> | <input type="radio"/> | <input type="radio"/> |
| Bulging veins                                                                         | <input type="radio"/>              | <input type="radio"/> | <input type="radio"/> | <input type="radio"/> | <input type="radio"/> | <input type="radio"/> |
| Burning sensations                                                                    | <input type="radio"/>              | <input type="radio"/> | <input type="radio"/> | <input type="radio"/> | <input type="radio"/> | <input type="radio"/> |
| Bruising of skin                                                                      | <input type="radio"/>              | <input type="radio"/> | <input type="radio"/> | <input type="radio"/> | <input type="radio"/> | <input type="radio"/> |
| Calf cramps                                                                           | <input type="radio"/>              | <input type="radio"/> | <input type="radio"/> | <input type="radio"/> | <input type="radio"/> | <input type="radio"/> |
| Change in nails (i.e. white spots, brittleness, change in moons)                      | <input type="radio"/>              | <input type="radio"/> | <input type="radio"/> | <input type="radio"/> | <input type="radio"/> | <input type="radio"/> |
| Changes in voice                                                                      | <input type="radio"/>              | <input type="radio"/> | <input type="radio"/> | <input type="radio"/> | <input type="radio"/> | <input type="radio"/> |
| Changed sense of taste                                                                | <input type="radio"/>              | <input type="radio"/> | <input type="radio"/> | <input type="radio"/> | <input type="radio"/> | <input type="radio"/> |
| Chills but no fever                                                                   | <input type="radio"/>              | <input type="radio"/> | <input type="radio"/> | <input type="radio"/> | <input type="radio"/> | <input type="radio"/> |
| Clogged ears                                                                          | <input type="radio"/>              | <input type="radio"/> | <input type="radio"/> | <input type="radio"/> | <input type="radio"/> | <input type="radio"/> |
| Cold burning feeling in lungs                                                         | <input type="radio"/>              | <input type="radio"/> | <input type="radio"/> | <input type="radio"/> | <input type="radio"/> | <input type="radio"/> |
| Confusion                                                                             | <input type="radio"/>              | <input type="radio"/> | <input type="radio"/> | <input type="radio"/> | <input type="radio"/> | <input type="radio"/> |
| Congested or runny nose                                                               | <input type="radio"/>              | <input type="radio"/> | <input type="radio"/> | <input type="radio"/> | <input type="radio"/> | <input type="radio"/> |
| Constant thirst                                                                       | <input type="radio"/>              | <input type="radio"/> | <input type="radio"/> | <input type="radio"/> | <input type="radio"/> | <input type="radio"/> |
| Costochondritis (inflammation of the cartilage that connects a rib to the breastbone) | <input type="radio"/>              | <input type="radio"/> | <input type="radio"/> | <input type="radio"/> | <input type="radio"/> | <input type="radio"/> |
| Cough                                                                                 | <input type="radio"/>              | <input type="radio"/> | <input type="radio"/> | <input type="radio"/> | <input type="radio"/> | <input type="radio"/> |
| Coughing up blood                                                                     | <input type="radio"/>              | <input type="radio"/> | <input type="radio"/> | <input type="radio"/> | <input type="radio"/> | <input type="radio"/> |

|                                                                                             |                       |                       |                       |                       |                       |                       |
|---------------------------------------------------------------------------------------------|-----------------------|-----------------------|-----------------------|-----------------------|-----------------------|-----------------------|
| Covid toes (tender or itchy rash or chilblains on the toes or foot)                         | <input type="radio"/> | <input type="radio"/> | <input type="radio"/> | <input type="radio"/> | <input type="radio"/> | <input type="radio"/> |
| Cracked or dry lips                                                                         | <input type="radio"/> | <input type="radio"/> | <input type="radio"/> | <input type="radio"/> | <input type="radio"/> | <input type="radio"/> |
| Dental problems (i.e. chipped tooth, tooth loss)                                            | <input type="radio"/> | <input type="radio"/> | <input type="radio"/> | <input type="radio"/> | <input type="radio"/> | <input type="radio"/> |
| Diarrhea                                                                                    | <input type="radio"/> | <input type="radio"/> | <input type="radio"/> | <input type="radio"/> | <input type="radio"/> | <input type="radio"/> |
| Difficulty concentrating or focusing                                                        | <input type="radio"/> | <input type="radio"/> | <input type="radio"/> | <input type="radio"/> | <input type="radio"/> | <input type="radio"/> |
| Difficulty sleeping                                                                         | <input type="radio"/> | <input type="radio"/> | <input type="radio"/> | <input type="radio"/> | <input type="radio"/> | <input type="radio"/> |
| Difficulty speaking properly                                                                | <input type="radio"/> | <input type="radio"/> | <input type="radio"/> | <input type="radio"/> | <input type="radio"/> | <input type="radio"/> |
| Discoloration of the skin (for example: purple or blue on the hands or feet, no blistering) | <input type="radio"/> | <input type="radio"/> | <input type="radio"/> | <input type="radio"/> | <input type="radio"/> | <input type="radio"/> |
| Dizziness                                                                                   | <input type="radio"/> | <input type="radio"/> | <input type="radio"/> | <input type="radio"/> | <input type="radio"/> | <input type="radio"/> |
| Dry eyes                                                                                    | <input type="radio"/> | <input type="radio"/> | <input type="radio"/> | <input type="radio"/> | <input type="radio"/> | <input type="radio"/> |
| Dry or peeling skin                                                                         | <input type="radio"/> | <input type="radio"/> | <input type="radio"/> | <input type="radio"/> | <input type="radio"/> | <input type="radio"/> |
| Dry scalp or dandruff                                                                       | <input type="radio"/> | <input type="radio"/> | <input type="radio"/> | <input type="radio"/> | <input type="radio"/> | <input type="radio"/> |
| Dry throat                                                                                  | <input type="radio"/> | <input type="radio"/> | <input type="radio"/> | <input type="radio"/> | <input type="radio"/> | <input type="radio"/> |
| Ear pain/earache                                                                            | <input type="radio"/> | <input type="radio"/> | <input type="radio"/> | <input type="radio"/> | <input type="radio"/> | <input type="radio"/> |
| Elevated thyroid hormones                                                                   | <input type="radio"/> | <input type="radio"/> | <input type="radio"/> | <input type="radio"/> | <input type="radio"/> | <input type="radio"/> |
| Extreme pressure at base of head or occipital nerve                                         | <input type="radio"/> | <input type="radio"/> | <input type="radio"/> | <input type="radio"/> | <input type="radio"/> | <input type="radio"/> |
| Eye stye or infection                                                                       | <input type="radio"/> | <input type="radio"/> | <input type="radio"/> | <input type="radio"/> | <input type="radio"/> | <input type="radio"/> |
| Fatigue                                                                                     | <input type="radio"/> | <input type="radio"/> | <input type="radio"/> | <input type="radio"/> | <input type="radio"/> | <input type="radio"/> |
| Feeling irritable                                                                           | <input type="radio"/> | <input type="radio"/> | <input type="radio"/> | <input type="radio"/> | <input type="radio"/> | <input type="radio"/> |
| Feeling of burning skin                                                                     | <input type="radio"/> | <input type="radio"/> | <input type="radio"/> | <input type="radio"/> | <input type="radio"/> | <input type="radio"/> |
| Fever or chills                                                                             | <input type="radio"/> | <input type="radio"/> | <input type="radio"/> | <input type="radio"/> | <input type="radio"/> | <input type="radio"/> |
| Floaters or flashes of light in vision                                                      | <input type="radio"/> | <input type="radio"/> | <input type="radio"/> | <input type="radio"/> | <input type="radio"/> | <input type="radio"/> |
| Foot pain                                                                                   | <input type="radio"/> | <input type="radio"/> | <input type="radio"/> | <input type="radio"/> | <input type="radio"/> | <input type="radio"/> |
| GERD (acid reflux) with excessive salivation                                                | <input type="radio"/> | <input type="radio"/> | <input type="radio"/> | <input type="radio"/> | <input type="radio"/> | <input type="radio"/> |
| Goiter or lump in throat                                                                    | <input type="radio"/> | <input type="radio"/> | <input type="radio"/> | <input type="radio"/> | <input type="radio"/> | <input type="radio"/> |
| Hair loss                                                                                   | <input type="radio"/> | <input type="radio"/> | <input type="radio"/> | <input type="radio"/> | <input type="radio"/> | <input type="radio"/> |
| Hand or wrist pain                                                                          | <input type="radio"/> | <input type="radio"/> | <input type="radio"/> | <input type="radio"/> | <input type="radio"/> | <input type="radio"/> |
| Headache                                                                                    | <input type="radio"/> | <input type="radio"/> | <input type="radio"/> | <input type="radio"/> | <input type="radio"/> | <input type="radio"/> |
| Heart palpitations (heart skipping a beat or racing)                                        | <input type="radio"/> | <input type="radio"/> | <input type="radio"/> | <input type="radio"/> | <input type="radio"/> | <input type="radio"/> |
| Heat intolerance                                                                            | <input type="radio"/> | <input type="radio"/> | <input type="radio"/> | <input type="radio"/> | <input type="radio"/> | <input type="radio"/> |
| High blood pressure                                                                         | <input type="radio"/> | <input type="radio"/> | <input type="radio"/> | <input type="radio"/> | <input type="radio"/> | <input type="radio"/> |
| Hormone imbalances                                                                          | <input type="radio"/> | <input type="radio"/> | <input type="radio"/> | <input type="radio"/> | <input type="radio"/> | <input type="radio"/> |

|                                                             |                       |                       |                       |                       |                       |                       |
|-------------------------------------------------------------|-----------------------|-----------------------|-----------------------|-----------------------|-----------------------|-----------------------|
| "Hot" blood rush                                            | <input type="radio"/> | <input type="radio"/> | <input type="radio"/> | <input type="radio"/> | <input type="radio"/> | <input type="radio"/> |
| Inability to cry                                            | <input type="radio"/> | <input type="radio"/> | <input type="radio"/> | <input type="radio"/> | <input type="radio"/> | <input type="radio"/> |
| Inability to exercise or be active                          | <input type="radio"/> | <input type="radio"/> | <input type="radio"/> | <input type="radio"/> | <input type="radio"/> | <input type="radio"/> |
| Inability to yawn                                           | <input type="radio"/> | <input type="radio"/> | <input type="radio"/> | <input type="radio"/> | <input type="radio"/> | <input type="radio"/> |
| Internal tremors or buzzing/vibration                       | <input type="radio"/> | <input type="radio"/> | <input type="radio"/> | <input type="radio"/> | <input type="radio"/> | <input type="radio"/> |
| Irregular or skipped menstrual cycles                       | <input type="radio"/> | <input type="radio"/> | <input type="radio"/> | <input type="radio"/> | <input type="radio"/> | <input type="radio"/> |
| Jaw pain                                                    | <input type="radio"/> | <input type="radio"/> | <input type="radio"/> | <input type="radio"/> | <input type="radio"/> | <input type="radio"/> |
| Joint pain                                                  | <input type="radio"/> | <input type="radio"/> | <input type="radio"/> | <input type="radio"/> | <input type="radio"/> | <input type="radio"/> |
| Kidney issues or protein in urine                           | <input type="radio"/> | <input type="radio"/> | <input type="radio"/> | <input type="radio"/> | <input type="radio"/> | <input type="radio"/> |
| Kidney pain                                                 | <input type="radio"/> | <input type="radio"/> | <input type="radio"/> | <input type="radio"/> | <input type="radio"/> | <input type="radio"/> |
| Low blood oxygen                                            | <input type="radio"/> | <input type="radio"/> | <input type="radio"/> | <input type="radio"/> | <input type="radio"/> | <input type="radio"/> |
| Low blood pressure                                          | <input type="radio"/> | <input type="radio"/> | <input type="radio"/> | <input type="radio"/> | <input type="radio"/> | <input type="radio"/> |
| Lower back pain                                             | <input type="radio"/> | <input type="radio"/> | <input type="radio"/> | <input type="radio"/> | <input type="radio"/> | <input type="radio"/> |
| Loss of appetite                                            | <input type="radio"/> | <input type="radio"/> | <input type="radio"/> | <input type="radio"/> | <input type="radio"/> | <input type="radio"/> |
| Loss of hearing                                             | <input type="radio"/> | <input type="radio"/> | <input type="radio"/> | <input type="radio"/> | <input type="radio"/> | <input type="radio"/> |
| Loss or decrease in quality of vision                       | <input type="radio"/> | <input type="radio"/> | <input type="radio"/> | <input type="radio"/> | <input type="radio"/> | <input type="radio"/> |
| Lump in throat/difficulty swallowing                        | <input type="radio"/> | <input type="radio"/> | <input type="radio"/> | <input type="radio"/> | <input type="radio"/> | <input type="radio"/> |
| Memory problems                                             | <input type="radio"/> | <input type="radio"/> | <input type="radio"/> | <input type="radio"/> | <input type="radio"/> | <input type="radio"/> |
| Menstrual cycles that are heavier or lighter than normal    | <input type="radio"/> | <input type="radio"/> | <input type="radio"/> | <input type="radio"/> | <input type="radio"/> | <input type="radio"/> |
| Mid-back pain at base of ribs                               | <input type="radio"/> | <input type="radio"/> | <input type="radio"/> | <input type="radio"/> | <input type="radio"/> | <input type="radio"/> |
| Mouth sores or sore tongue                                  | <input type="radio"/> | <input type="radio"/> | <input type="radio"/> | <input type="radio"/> | <input type="radio"/> | <input type="radio"/> |
| Muscle or body aches                                        | <input type="radio"/> | <input type="radio"/> | <input type="radio"/> | <input type="radio"/> | <input type="radio"/> | <input type="radio"/> |
| Muscle twitching                                            | <input type="radio"/> | <input type="radio"/> | <input type="radio"/> | <input type="radio"/> | <input type="radio"/> | <input type="radio"/> |
| Nausea or vomiting                                          | <input type="radio"/> | <input type="radio"/> | <input type="radio"/> | <input type="radio"/> | <input type="radio"/> | <input type="radio"/> |
| Neck muscle pain                                            | <input type="radio"/> | <input type="radio"/> | <input type="radio"/> | <input type="radio"/> | <input type="radio"/> | <input type="radio"/> |
| Nerve pain                                                  | <input type="radio"/> | <input type="radio"/> | <input type="radio"/> | <input type="radio"/> | <input type="radio"/> | <input type="radio"/> |
| Nerve sensations (tingling, pins and needles, numbness)     | <input type="radio"/> | <input type="radio"/> | <input type="radio"/> | <input type="radio"/> | <input type="radio"/> | <input type="radio"/> |
| Neuropathy in feet and hands (weakness, numbness, and pain) | <input type="radio"/> | <input type="radio"/> | <input type="radio"/> | <input type="radio"/> | <input type="radio"/> | <input type="radio"/> |
| New allergies                                               | <input type="radio"/> | <input type="radio"/> | <input type="radio"/> | <input type="radio"/> | <input type="radio"/> | <input type="radio"/> |
| Night sweats                                                | <input type="radio"/> | <input type="radio"/> | <input type="radio"/> | <input type="radio"/> | <input type="radio"/> | <input type="radio"/> |
| Nightmares                                                  | <input type="radio"/> | <input type="radio"/> | <input type="radio"/> | <input type="radio"/> | <input type="radio"/> | <input type="radio"/> |
| Painful scalp                                               | <input type="radio"/> | <input type="radio"/> | <input type="radio"/> | <input type="radio"/> | <input type="radio"/> | <input type="radio"/> |
| Partial or complete loss of sense of smell                  | <input type="radio"/> | <input type="radio"/> | <input type="radio"/> | <input type="radio"/> | <input type="radio"/> | <input type="radio"/> |

|                                                                                 |                       |                       |                       |                       |                       |                       |
|---------------------------------------------------------------------------------|-----------------------|-----------------------|-----------------------|-----------------------|-----------------------|-----------------------|
| Partial or complete loss of sense of taste                                      | <input type="radio"/> | <input type="radio"/> | <input type="radio"/> | <input type="radio"/> | <input type="radio"/> | <input type="radio"/> |
| Persistent chest pain or pressure                                               | <input type="radio"/> | <input type="radio"/> | <input type="radio"/> | <input type="radio"/> | <input type="radio"/> | <input type="radio"/> |
| Personality change (drastic)                                                    | <input type="radio"/> | <input type="radio"/> | <input type="radio"/> | <input type="radio"/> | <input type="radio"/> | <input type="radio"/> |
| Petechiae (pinpoint rash)                                                       | <input type="radio"/> | <input type="radio"/> | <input type="radio"/> | <input type="radio"/> | <input type="radio"/> | <input type="radio"/> |
| Phantom smells                                                                  | <input type="radio"/> | <input type="radio"/> | <input type="radio"/> | <input type="radio"/> | <input type="radio"/> | <input type="radio"/> |
| Phlegm in back of throat                                                        | <input type="radio"/> | <input type="radio"/> | <input type="radio"/> | <input type="radio"/> | <input type="radio"/> | <input type="radio"/> |
| Post-exertional malaise (worsened symptoms or flu-like symptoms after exertion) | <input type="radio"/> | <input type="radio"/> | <input type="radio"/> | <input type="radio"/> | <input type="radio"/> | <input type="radio"/> |
| Postnasal drip                                                                  | <input type="radio"/> | <input type="radio"/> | <input type="radio"/> | <input type="radio"/> | <input type="radio"/> | <input type="radio"/> |
| Rash                                                                            | <input type="radio"/> | <input type="radio"/> | <input type="radio"/> | <input type="radio"/> | <input type="radio"/> | <input type="radio"/> |
| Reflux or heartburn                                                             | <input type="radio"/> | <input type="radio"/> | <input type="radio"/> | <input type="radio"/> | <input type="radio"/> | <input type="radio"/> |
| Runny nose                                                                      | <input type="radio"/> | <input type="radio"/> | <input type="radio"/> | <input type="radio"/> | <input type="radio"/> | <input type="radio"/> |
| Sadness                                                                         | <input type="radio"/> | <input type="radio"/> | <input type="radio"/> | <input type="radio"/> | <input type="radio"/> | <input type="radio"/> |
| Seizures                                                                        | <input type="radio"/> | <input type="radio"/> | <input type="radio"/> | <input type="radio"/> | <input type="radio"/> | <input type="radio"/> |
| Sharp or sudden chest pain                                                      | <input type="radio"/> | <input type="radio"/> | <input type="radio"/> | <input type="radio"/> | <input type="radio"/> | <input type="radio"/> |
| Shortness of breath or difficulty breathing                                     | <input type="radio"/> | <input type="radio"/> | <input type="radio"/> | <input type="radio"/> | <input type="radio"/> | <input type="radio"/> |
| Shortness of breath or exhaustion from bending over                             | <input type="radio"/> | <input type="radio"/> | <input type="radio"/> | <input type="radio"/> | <input type="radio"/> | <input type="radio"/> |
| Sleeping more than normal                                                       | <input type="radio"/> | <input type="radio"/> | <input type="radio"/> | <input type="radio"/> | <input type="radio"/> | <input type="radio"/> |
| Sore throat                                                                     | <input type="radio"/> | <input type="radio"/> | <input type="radio"/> | <input type="radio"/> | <input type="radio"/> | <input type="radio"/> |
| Spinal issues                                                                   | <input type="radio"/> | <input type="radio"/> | <input type="radio"/> | <input type="radio"/> | <input type="radio"/> | <input type="radio"/> |
| Spikes in blood pressure                                                        | <input type="radio"/> | <input type="radio"/> | <input type="radio"/> | <input type="radio"/> | <input type="radio"/> | <input type="radio"/> |
| Swollen hands or feet                                                           | <input type="radio"/> | <input type="radio"/> | <input type="radio"/> | <input type="radio"/> | <input type="radio"/> | <input type="radio"/> |
| Swollen lymph nodes                                                             | <input type="radio"/> | <input type="radio"/> | <input type="radio"/> | <input type="radio"/> | <input type="radio"/> | <input type="radio"/> |
| Syncope (fainting)                                                              | <input type="radio"/> | <input type="radio"/> | <input type="radio"/> | <input type="radio"/> | <input type="radio"/> | <input type="radio"/> |
| Tachycardia (rapid heartbeat) at rest                                           | <input type="radio"/> | <input type="radio"/> | <input type="radio"/> | <input type="radio"/> | <input type="radio"/> | <input type="radio"/> |
| Tachycardia (rapid heartbeat) after standing up                                 | <input type="radio"/> | <input type="radio"/> | <input type="radio"/> | <input type="radio"/> | <input type="radio"/> | <input type="radio"/> |
| Thrush (white fungal infection in the mouth or throat)                          | <input type="radio"/> | <input type="radio"/> | <input type="radio"/> | <input type="radio"/> | <input type="radio"/> | <input type="radio"/> |
| Tinnitus or humming in ears                                                     | <input type="radio"/> | <input type="radio"/> | <input type="radio"/> | <input type="radio"/> | <input type="radio"/> | <input type="radio"/> |
| Tremors or shakiness                                                            | <input type="radio"/> | <input type="radio"/> | <input type="radio"/> | <input type="radio"/> | <input type="radio"/> | <input type="radio"/> |
| Upper back pain                                                                 | <input type="radio"/> | <input type="radio"/> | <input type="radio"/> | <input type="radio"/> | <input type="radio"/> | <input type="radio"/> |
| UTI (urinary tract infection)                                                   | <input type="radio"/> | <input type="radio"/> | <input type="radio"/> | <input type="radio"/> | <input type="radio"/> | <input type="radio"/> |
| Weakened neck                                                                   | <input type="radio"/> | <input type="radio"/> | <input type="radio"/> | <input type="radio"/> | <input type="radio"/> | <input type="radio"/> |
| Weight gain                                                                     | <input type="radio"/> | <input type="radio"/> | <input type="radio"/> | <input type="radio"/> | <input type="radio"/> | <input type="radio"/> |

**Since [vaccine\_arm\_1][v\_v\_vax\_date], while experiencing the symptom, how much did it bother you in terms of discomfort or pain?**

**\*If you have not experienced the symptom since your vaccine, please choose "Not at all"**

|                                                                                       | Not at all            | A little bit          | Somewhat              | Quite a bit           | Very much             |
|---------------------------------------------------------------------------------------|-----------------------|-----------------------|-----------------------|-----------------------|-----------------------|
| Abdominal pain                                                                        | <input type="radio"/> | <input type="radio"/> | <input type="radio"/> | <input type="radio"/> | <input type="radio"/> |
| Abnormally low temperature                                                            | <input type="radio"/> | <input type="radio"/> | <input type="radio"/> | <input type="radio"/> | <input type="radio"/> |
| Acid reflux                                                                           | <input type="radio"/> | <input type="radio"/> | <input type="radio"/> | <input type="radio"/> | <input type="radio"/> |
| Afternoon or evening fevers/low-grade fevers                                          | <input type="radio"/> | <input type="radio"/> | <input type="radio"/> | <input type="radio"/> | <input type="radio"/> |
| Anemia (low number of red blood cells)                                                | <input type="radio"/> | <input type="radio"/> | <input type="radio"/> | <input type="radio"/> | <input type="radio"/> |
| Anxiety                                                                               | <input type="radio"/> | <input type="radio"/> | <input type="radio"/> | <input type="radio"/> | <input type="radio"/> |
| Arrhythmia (improper beating of the heart due to electrical impulse problems)         | <input type="radio"/> | <input type="radio"/> | <input type="radio"/> | <input type="radio"/> | <input type="radio"/> |
| Bilateral neck throbbing around lymph nodes                                           | <input type="radio"/> | <input type="radio"/> | <input type="radio"/> | <input type="radio"/> | <input type="radio"/> |
| Blurry vision                                                                         | <input type="radio"/> | <input type="radio"/> | <input type="radio"/> | <input type="radio"/> | <input type="radio"/> |
| Bone aches in extremities                                                             | <input type="radio"/> | <input type="radio"/> | <input type="radio"/> | <input type="radio"/> | <input type="radio"/> |
| Brain fog                                                                             | <input type="radio"/> | <input type="radio"/> | <input type="radio"/> | <input type="radio"/> | <input type="radio"/> |
| Brain pressure                                                                        | <input type="radio"/> | <input type="radio"/> | <input type="radio"/> | <input type="radio"/> | <input type="radio"/> |
| Bulging veins                                                                         | <input type="radio"/> | <input type="radio"/> | <input type="radio"/> | <input type="radio"/> | <input type="radio"/> |
| Burning sensations                                                                    | <input type="radio"/> | <input type="radio"/> | <input type="radio"/> | <input type="radio"/> | <input type="radio"/> |
| Bruising of skin                                                                      | <input type="radio"/> | <input type="radio"/> | <input type="radio"/> | <input type="radio"/> | <input type="radio"/> |
| Calf cramps                                                                           | <input type="radio"/> | <input type="radio"/> | <input type="radio"/> | <input type="radio"/> | <input type="radio"/> |
| Change in nails (i.e. white spots, brittleness, change in moons)                      | <input type="radio"/> | <input type="radio"/> | <input type="radio"/> | <input type="radio"/> | <input type="radio"/> |
| Changes in voice                                                                      | <input type="radio"/> | <input type="radio"/> | <input type="radio"/> | <input type="radio"/> | <input type="radio"/> |
| Changed sense of taste                                                                | <input type="radio"/> | <input type="radio"/> | <input type="radio"/> | <input type="radio"/> | <input type="radio"/> |
| Chills but no fever                                                                   | <input type="radio"/> | <input type="radio"/> | <input type="radio"/> | <input type="radio"/> | <input type="radio"/> |
| Clogged ears                                                                          | <input type="radio"/> | <input type="radio"/> | <input type="radio"/> | <input type="radio"/> | <input type="radio"/> |
| Cold burning feeling in lungs                                                         | <input type="radio"/> | <input type="radio"/> | <input type="radio"/> | <input type="radio"/> | <input type="radio"/> |
| Confusion                                                                             | <input type="radio"/> | <input type="radio"/> | <input type="radio"/> | <input type="radio"/> | <input type="radio"/> |
| Congested or runny nose                                                               | <input type="radio"/> | <input type="radio"/> | <input type="radio"/> | <input type="radio"/> | <input type="radio"/> |
| Constant thirst                                                                       | <input type="radio"/> | <input type="radio"/> | <input type="radio"/> | <input type="radio"/> | <input type="radio"/> |
| Costochondritis (inflammation of the cartilage that connects a rib to the breastbone) | <input type="radio"/> | <input type="radio"/> | <input type="radio"/> | <input type="radio"/> | <input type="radio"/> |
| Cough                                                                                 | <input type="radio"/> | <input type="radio"/> | <input type="radio"/> | <input type="radio"/> | <input type="radio"/> |

|                                                                                             |                       |                       |                       |                       |                       |
|---------------------------------------------------------------------------------------------|-----------------------|-----------------------|-----------------------|-----------------------|-----------------------|
| Coughing up blood                                                                           | <input type="radio"/> | <input type="radio"/> | <input type="radio"/> | <input type="radio"/> | <input type="radio"/> |
| Covid toes (tender or itchy rash or chilblains on the toes or foot)                         | <input type="radio"/> | <input type="radio"/> | <input type="radio"/> | <input type="radio"/> | <input type="radio"/> |
| Cracked or dry lips                                                                         | <input type="radio"/> | <input type="radio"/> | <input type="radio"/> | <input type="radio"/> | <input type="radio"/> |
| Dental problems (i.e. chipped tooth, tooth loss)                                            | <input type="radio"/> | <input type="radio"/> | <input type="radio"/> | <input type="radio"/> | <input type="radio"/> |
| Diarrhea                                                                                    | <input type="radio"/> | <input type="radio"/> | <input type="radio"/> | <input type="radio"/> | <input type="radio"/> |
| Difficulty concentrating or focusing                                                        | <input type="radio"/> | <input type="radio"/> | <input type="radio"/> | <input type="radio"/> | <input type="radio"/> |
| Difficulty sleeping                                                                         | <input type="radio"/> | <input type="radio"/> | <input type="radio"/> | <input type="radio"/> | <input type="radio"/> |
| Difficulty speaking properly                                                                | <input type="radio"/> | <input type="radio"/> | <input type="radio"/> | <input type="radio"/> | <input type="radio"/> |
| Discoloration of the skin (for example: purple or blue on the hands or feet, no blistering) | <input type="radio"/> | <input type="radio"/> | <input type="radio"/> | <input type="radio"/> | <input type="radio"/> |
| Dizziness                                                                                   | <input type="radio"/> | <input type="radio"/> | <input type="radio"/> | <input type="radio"/> | <input type="radio"/> |
| Dry eyes                                                                                    | <input type="radio"/> | <input type="radio"/> | <input type="radio"/> | <input type="radio"/> | <input type="radio"/> |
| Dry or peeling skin                                                                         | <input type="radio"/> | <input type="radio"/> | <input type="radio"/> | <input type="radio"/> | <input type="radio"/> |
| Dry scalp or dandruff                                                                       | <input type="radio"/> | <input type="radio"/> | <input type="radio"/> | <input type="radio"/> | <input type="radio"/> |
| Dry throat                                                                                  | <input type="radio"/> | <input type="radio"/> | <input type="radio"/> | <input type="radio"/> | <input type="radio"/> |
| Ear pain/earache                                                                            | <input type="radio"/> | <input type="radio"/> | <input type="radio"/> | <input type="radio"/> | <input type="radio"/> |
| Elevated thyroid hormones                                                                   | <input type="radio"/> | <input type="radio"/> | <input type="radio"/> | <input type="radio"/> | <input type="radio"/> |
| Extreme pressure at base of head or occipital nerve                                         | <input type="radio"/> | <input type="radio"/> | <input type="radio"/> | <input type="radio"/> | <input type="radio"/> |
| Eye stye or infection                                                                       | <input type="radio"/> | <input type="radio"/> | <input type="radio"/> | <input type="radio"/> | <input type="radio"/> |
| Fatigue                                                                                     | <input type="radio"/> | <input type="radio"/> | <input type="radio"/> | <input type="radio"/> | <input type="radio"/> |
| Feeling irritable                                                                           | <input type="radio"/> | <input type="radio"/> | <input type="radio"/> | <input type="radio"/> | <input type="radio"/> |
| Feeling of burning skin                                                                     | <input type="radio"/> | <input type="radio"/> | <input type="radio"/> | <input type="radio"/> | <input type="radio"/> |
| Fever or chills                                                                             | <input type="radio"/> | <input type="radio"/> | <input type="radio"/> | <input type="radio"/> | <input type="radio"/> |
| Floaters or flashes of light in vision                                                      | <input type="radio"/> | <input type="radio"/> | <input type="radio"/> | <input type="radio"/> | <input type="radio"/> |
| Foot pain                                                                                   | <input type="radio"/> | <input type="radio"/> | <input type="radio"/> | <input type="radio"/> | <input type="radio"/> |
| GERD (acid reflux) with excessive salivation                                                | <input type="radio"/> | <input type="radio"/> | <input type="radio"/> | <input type="radio"/> | <input type="radio"/> |
| Goiter or lump in throat                                                                    | <input type="radio"/> | <input type="radio"/> | <input type="radio"/> | <input type="radio"/> | <input type="radio"/> |
| Hair loss                                                                                   | <input type="radio"/> | <input type="radio"/> | <input type="radio"/> | <input type="radio"/> | <input type="radio"/> |
| Hand or wrist pain                                                                          | <input type="radio"/> | <input type="radio"/> | <input type="radio"/> | <input type="radio"/> | <input type="radio"/> |
| Headache                                                                                    | <input type="radio"/> | <input type="radio"/> | <input type="radio"/> | <input type="radio"/> | <input type="radio"/> |
| Heart palpitations (heart skipping a beat or racing)                                        | <input type="radio"/> | <input type="radio"/> | <input type="radio"/> | <input type="radio"/> | <input type="radio"/> |
| Heat intolerance                                                                            | <input type="radio"/> | <input type="radio"/> | <input type="radio"/> | <input type="radio"/> | <input type="radio"/> |
| High blood pressure                                                                         | <input type="radio"/> | <input type="radio"/> | <input type="radio"/> | <input type="radio"/> | <input type="radio"/> |

|                                                             |                       |                       |                       |                       |                       |
|-------------------------------------------------------------|-----------------------|-----------------------|-----------------------|-----------------------|-----------------------|
| Hormone imbalances                                          | <input type="radio"/> | <input type="radio"/> | <input type="radio"/> | <input type="radio"/> | <input type="radio"/> |
| "Hot" blood rush                                            | <input type="radio"/> | <input type="radio"/> | <input type="radio"/> | <input type="radio"/> | <input type="radio"/> |
| Inability to cry                                            | <input type="radio"/> | <input type="radio"/> | <input type="radio"/> | <input type="radio"/> | <input type="radio"/> |
| Inability to exercise or be active                          | <input type="radio"/> | <input type="radio"/> | <input type="radio"/> | <input type="radio"/> | <input type="radio"/> |
| Inability to yawn                                           | <input type="radio"/> | <input type="radio"/> | <input type="radio"/> | <input type="radio"/> | <input type="radio"/> |
| Internal tremors or buzzing/vibration                       | <input type="radio"/> | <input type="radio"/> | <input type="radio"/> | <input type="radio"/> | <input type="radio"/> |
| Irregular or skipped menstrual cycles                       | <input type="radio"/> | <input type="radio"/> | <input type="radio"/> | <input type="radio"/> | <input type="radio"/> |
| Jaw pain                                                    | <input type="radio"/> | <input type="radio"/> | <input type="radio"/> | <input type="radio"/> | <input type="radio"/> |
| Joint pain                                                  | <input type="radio"/> | <input type="radio"/> | <input type="radio"/> | <input type="radio"/> | <input type="radio"/> |
| Kidney issues or protein in urine                           | <input type="radio"/> | <input type="radio"/> | <input type="radio"/> | <input type="radio"/> | <input type="radio"/> |
| Kidney pain                                                 | <input type="radio"/> | <input type="radio"/> | <input type="radio"/> | <input type="radio"/> | <input type="radio"/> |
| Low blood oxygen                                            | <input type="radio"/> | <input type="radio"/> | <input type="radio"/> | <input type="radio"/> | <input type="radio"/> |
| Low blood pressure                                          | <input type="radio"/> | <input type="radio"/> | <input type="radio"/> | <input type="radio"/> | <input type="radio"/> |
| Lower back pain                                             | <input type="radio"/> | <input type="radio"/> | <input type="radio"/> | <input type="radio"/> | <input type="radio"/> |
| Loss of appetite                                            | <input type="radio"/> | <input type="radio"/> | <input type="radio"/> | <input type="radio"/> | <input type="radio"/> |
| Loss of hearing                                             | <input type="radio"/> | <input type="radio"/> | <input type="radio"/> | <input type="radio"/> | <input type="radio"/> |
| Loss or decrease in quality of vision                       | <input type="radio"/> | <input type="radio"/> | <input type="radio"/> | <input type="radio"/> | <input type="radio"/> |
| Lump in throat/difficulty swallowing                        | <input type="radio"/> | <input type="radio"/> | <input type="radio"/> | <input type="radio"/> | <input type="radio"/> |
| Memory problems                                             | <input type="radio"/> | <input type="radio"/> | <input type="radio"/> | <input type="radio"/> | <input type="radio"/> |
| Menstrual cycles that are heavier or lighter than normal    | <input type="radio"/> | <input type="radio"/> | <input type="radio"/> | <input type="radio"/> | <input type="radio"/> |
| Mid-back pain at base of ribs                               | <input type="radio"/> | <input type="radio"/> | <input type="radio"/> | <input type="radio"/> | <input type="radio"/> |
| Mouth sores or sore tongue                                  | <input type="radio"/> | <input type="radio"/> | <input type="radio"/> | <input type="radio"/> | <input type="radio"/> |
| Muscle or body aches                                        | <input type="radio"/> | <input type="radio"/> | <input type="radio"/> | <input type="radio"/> | <input type="radio"/> |
| Muscle twitching                                            | <input type="radio"/> | <input type="radio"/> | <input type="radio"/> | <input type="radio"/> | <input type="radio"/> |
| Nausea or vomiting                                          | <input type="radio"/> | <input type="radio"/> | <input type="radio"/> | <input type="radio"/> | <input type="radio"/> |
| Neck muscle pain                                            | <input type="radio"/> | <input type="radio"/> | <input type="radio"/> | <input type="radio"/> | <input type="radio"/> |
| Nerve pain                                                  | <input type="radio"/> | <input type="radio"/> | <input type="radio"/> | <input type="radio"/> | <input type="radio"/> |
| Nerve sensations (tingling, pins and needles, numbness)     | <input type="radio"/> | <input type="radio"/> | <input type="radio"/> | <input type="radio"/> | <input type="radio"/> |
| Neuropathy in feet and hands (weakness, numbness, and pain) | <input type="radio"/> | <input type="radio"/> | <input type="radio"/> | <input type="radio"/> | <input type="radio"/> |
| New allergies                                               | <input type="radio"/> | <input type="radio"/> | <input type="radio"/> | <input type="radio"/> | <input type="radio"/> |
| Night sweats                                                | <input type="radio"/> | <input type="radio"/> | <input type="radio"/> | <input type="radio"/> | <input type="radio"/> |
| Nightmares                                                  | <input type="radio"/> | <input type="radio"/> | <input type="radio"/> | <input type="radio"/> | <input type="radio"/> |
| Painful scalp                                               | <input type="radio"/> | <input type="radio"/> | <input type="radio"/> | <input type="radio"/> | <input type="radio"/> |

|                                                                                 |                       |                       |                       |                       |                       |
|---------------------------------------------------------------------------------|-----------------------|-----------------------|-----------------------|-----------------------|-----------------------|
| Partial or complete loss of sense of smell                                      | <input type="radio"/> | <input type="radio"/> | <input type="radio"/> | <input type="radio"/> | <input type="radio"/> |
| Partial or complete loss of sense of taste                                      | <input type="radio"/> | <input type="radio"/> | <input type="radio"/> | <input type="radio"/> | <input type="radio"/> |
| Persistent chest pain or pressure                                               | <input type="radio"/> | <input type="radio"/> | <input type="radio"/> | <input type="radio"/> | <input type="radio"/> |
| Personality change (drastic)                                                    | <input type="radio"/> | <input type="radio"/> | <input type="radio"/> | <input type="radio"/> | <input type="radio"/> |
| Petechiae (pinpoint rash)                                                       | <input type="radio"/> | <input type="radio"/> | <input type="radio"/> | <input type="radio"/> | <input type="radio"/> |
| Phantom smells                                                                  | <input type="radio"/> | <input type="radio"/> | <input type="radio"/> | <input type="radio"/> | <input type="radio"/> |
| Phlegm in back of throat                                                        | <input type="radio"/> | <input type="radio"/> | <input type="radio"/> | <input type="radio"/> | <input type="radio"/> |
| Post-exertional malaise (worsened symptoms or flu-like symptoms after exertion) | <input type="radio"/> | <input type="radio"/> | <input type="radio"/> | <input type="radio"/> | <input type="radio"/> |
| Postnasal drip                                                                  | <input type="radio"/> | <input type="radio"/> | <input type="radio"/> | <input type="radio"/> | <input type="radio"/> |
| Rash                                                                            | <input type="radio"/> | <input type="radio"/> | <input type="radio"/> | <input type="radio"/> | <input type="radio"/> |
| Reflux or heartburn                                                             | <input type="radio"/> | <input type="radio"/> | <input type="radio"/> | <input type="radio"/> | <input type="radio"/> |
| Runny nose                                                                      | <input type="radio"/> | <input type="radio"/> | <input type="radio"/> | <input type="radio"/> | <input type="radio"/> |
| Sadness                                                                         | <input type="radio"/> | <input type="radio"/> | <input type="radio"/> | <input type="radio"/> | <input type="radio"/> |
| Seizures                                                                        | <input type="radio"/> | <input type="radio"/> | <input type="radio"/> | <input type="radio"/> | <input type="radio"/> |
| Sharp or sudden chest pain                                                      | <input type="radio"/> | <input type="radio"/> | <input type="radio"/> | <input type="radio"/> | <input type="radio"/> |
| Shortness of breath or difficulty breathing                                     | <input type="radio"/> | <input type="radio"/> | <input type="radio"/> | <input type="radio"/> | <input type="radio"/> |
| Shortness of breath or exhaustion from bending over                             | <input type="radio"/> | <input type="radio"/> | <input type="radio"/> | <input type="radio"/> | <input type="radio"/> |
| Sleeping more than normal                                                       | <input type="radio"/> | <input type="radio"/> | <input type="radio"/> | <input type="radio"/> | <input type="radio"/> |
| Sore throat                                                                     | <input type="radio"/> | <input type="radio"/> | <input type="radio"/> | <input type="radio"/> | <input type="radio"/> |
| Spinal issues                                                                   | <input type="radio"/> | <input type="radio"/> | <input type="radio"/> | <input type="radio"/> | <input type="radio"/> |
| Spikes in blood pressure                                                        | <input type="radio"/> | <input type="radio"/> | <input type="radio"/> | <input type="radio"/> | <input type="radio"/> |
| Swollen hands or feet                                                           | <input type="radio"/> | <input type="radio"/> | <input type="radio"/> | <input type="radio"/> | <input type="radio"/> |
| Swollen lymph nodes                                                             | <input type="radio"/> | <input type="radio"/> | <input type="radio"/> | <input type="radio"/> | <input type="radio"/> |
| Syncope (fainting)                                                              | <input type="radio"/> | <input type="radio"/> | <input type="radio"/> | <input type="radio"/> | <input type="radio"/> |
| Tachycardia (rapid heartbeat) at rest                                           | <input type="radio"/> | <input type="radio"/> | <input type="radio"/> | <input type="radio"/> | <input type="radio"/> |
| Tachycardia (rapid heartbeat) after standing up                                 | <input type="radio"/> | <input type="radio"/> | <input type="radio"/> | <input type="radio"/> | <input type="radio"/> |
| Thrush (white fungal infection in the mouth or throat)                          | <input type="radio"/> | <input type="radio"/> | <input type="radio"/> | <input type="radio"/> | <input type="radio"/> |
| Tinnitus or humming in ears                                                     | <input type="radio"/> | <input type="radio"/> | <input type="radio"/> | <input type="radio"/> | <input type="radio"/> |
| Tremors or shakiness                                                            | <input type="radio"/> | <input type="radio"/> | <input type="radio"/> | <input type="radio"/> | <input type="radio"/> |
| Upper back pain                                                                 | <input type="radio"/> | <input type="radio"/> | <input type="radio"/> | <input type="radio"/> | <input type="radio"/> |
| UTI (urinary tract infection)                                                   | <input type="radio"/> | <input type="radio"/> | <input type="radio"/> | <input type="radio"/> | <input type="radio"/> |
| Weakened neck                                                                   | <input type="radio"/> | <input type="radio"/> | <input type="radio"/> | <input type="radio"/> | <input type="radio"/> |



Weight gain

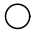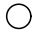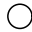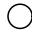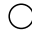

**Since [vaccine\_arm\_1][v\_v\_vax\_date], while experiencing the symptom, how much did it impair your ability to work compared to pre-COVID?**

**\*If you have not experienced the symptom since your vaccine, please choose "Not at all."**

|                                                                                       | Not at all            | A little bit          | Somewhat              | Quite a bit           | Very much             |
|---------------------------------------------------------------------------------------|-----------------------|-----------------------|-----------------------|-----------------------|-----------------------|
| Abdominal pain                                                                        | <input type="radio"/> | <input type="radio"/> | <input type="radio"/> | <input type="radio"/> | <input type="radio"/> |
| Abnormally low temperature                                                            | <input type="radio"/> | <input type="radio"/> | <input type="radio"/> | <input type="radio"/> | <input type="radio"/> |
| Acid reflux                                                                           | <input type="radio"/> | <input type="radio"/> | <input type="radio"/> | <input type="radio"/> | <input type="radio"/> |
| Afternoon or evening fevers/low-grade fevers                                          | <input type="radio"/> | <input type="radio"/> | <input type="radio"/> | <input type="radio"/> | <input type="radio"/> |
| Anemia (low number of red blood cells)                                                | <input type="radio"/> | <input type="radio"/> | <input type="radio"/> | <input type="radio"/> | <input type="radio"/> |
| Anxiety                                                                               | <input type="radio"/> | <input type="radio"/> | <input type="radio"/> | <input type="radio"/> | <input type="radio"/> |
| Arrhythmia (improper beating of the heart due to electrical impulse problems)         | <input type="radio"/> | <input type="radio"/> | <input type="radio"/> | <input type="radio"/> | <input type="radio"/> |
| Bilateral neck throbbing around lymph nodes                                           | <input type="radio"/> | <input type="radio"/> | <input type="radio"/> | <input type="radio"/> | <input type="radio"/> |
| Blurry vision                                                                         | <input type="radio"/> | <input type="radio"/> | <input type="radio"/> | <input type="radio"/> | <input type="radio"/> |
| Bone aches in extremities                                                             | <input type="radio"/> | <input type="radio"/> | <input type="radio"/> | <input type="radio"/> | <input type="radio"/> |
| Brain fog                                                                             | <input type="radio"/> | <input type="radio"/> | <input type="radio"/> | <input type="radio"/> | <input type="radio"/> |
| Brain pressure                                                                        | <input type="radio"/> | <input type="radio"/> | <input type="radio"/> | <input type="radio"/> | <input type="radio"/> |
| Bulging veins                                                                         | <input type="radio"/> | <input type="radio"/> | <input type="radio"/> | <input type="radio"/> | <input type="radio"/> |
| Burning sensations                                                                    | <input type="radio"/> | <input type="radio"/> | <input type="radio"/> | <input type="radio"/> | <input type="radio"/> |
| Bruising of skin                                                                      | <input type="radio"/> | <input type="radio"/> | <input type="radio"/> | <input type="radio"/> | <input type="radio"/> |
| Calf cramps                                                                           | <input type="radio"/> | <input type="radio"/> | <input type="radio"/> | <input type="radio"/> | <input type="radio"/> |
| Change in nails (i.e. white spots, brittleness, change in moons)                      | <input type="radio"/> | <input type="radio"/> | <input type="radio"/> | <input type="radio"/> | <input type="radio"/> |
| Changes in voice                                                                      | <input type="radio"/> | <input type="radio"/> | <input type="radio"/> | <input type="radio"/> | <input type="radio"/> |
| Changed sense of taste                                                                | <input type="radio"/> | <input type="radio"/> | <input type="radio"/> | <input type="radio"/> | <input type="radio"/> |
| Chills but no fever                                                                   | <input type="radio"/> | <input type="radio"/> | <input type="radio"/> | <input type="radio"/> | <input type="radio"/> |
| Clogged ears                                                                          | <input type="radio"/> | <input type="radio"/> | <input type="radio"/> | <input type="radio"/> | <input type="radio"/> |
| Cold burning feeling in lungs                                                         | <input type="radio"/> | <input type="radio"/> | <input type="radio"/> | <input type="radio"/> | <input type="radio"/> |
| Confusion                                                                             | <input type="radio"/> | <input type="radio"/> | <input type="radio"/> | <input type="radio"/> | <input type="radio"/> |
| Congested or runny nose                                                               | <input type="radio"/> | <input type="radio"/> | <input type="radio"/> | <input type="radio"/> | <input type="radio"/> |
| Constant thirst                                                                       | <input type="radio"/> | <input type="radio"/> | <input type="radio"/> | <input type="radio"/> | <input type="radio"/> |
| Costochondritis (inflammation of the cartilage that connects a rib to the breastbone) | <input type="radio"/> | <input type="radio"/> | <input type="radio"/> | <input type="radio"/> | <input type="radio"/> |
| Cough                                                                                 | <input type="radio"/> | <input type="radio"/> | <input type="radio"/> | <input type="radio"/> | <input type="radio"/> |

|                                                                                             |                       |                       |                       |                       |                       |
|---------------------------------------------------------------------------------------------|-----------------------|-----------------------|-----------------------|-----------------------|-----------------------|
| Coughing up blood                                                                           | <input type="radio"/> | <input type="radio"/> | <input type="radio"/> | <input type="radio"/> | <input type="radio"/> |
| Covid toes (tender or itchy rash or chilblains on the toes or foot)                         | <input type="radio"/> | <input type="radio"/> | <input type="radio"/> | <input type="radio"/> | <input type="radio"/> |
| Cracked or dry lips                                                                         | <input type="radio"/> | <input type="radio"/> | <input type="radio"/> | <input type="radio"/> | <input type="radio"/> |
| Dental problems (i.e. chipped tooth, tooth loss)                                            | <input type="radio"/> | <input type="radio"/> | <input type="radio"/> | <input type="radio"/> | <input type="radio"/> |
| Diarrhea                                                                                    | <input type="radio"/> | <input type="radio"/> | <input type="radio"/> | <input type="radio"/> | <input type="radio"/> |
| Difficulty concentrating or focusing                                                        | <input type="radio"/> | <input type="radio"/> | <input type="radio"/> | <input type="radio"/> | <input type="radio"/> |
| Difficulty sleeping                                                                         | <input type="radio"/> | <input type="radio"/> | <input type="radio"/> | <input type="radio"/> | <input type="radio"/> |
| Difficulty speaking properly                                                                | <input type="radio"/> | <input type="radio"/> | <input type="radio"/> | <input type="radio"/> | <input type="radio"/> |
| Discoloration of the skin (for example: purple or blue on the hands or feet, no blistering) | <input type="radio"/> | <input type="radio"/> | <input type="radio"/> | <input type="radio"/> | <input type="radio"/> |
| Dizziness                                                                                   | <input type="radio"/> | <input type="radio"/> | <input type="radio"/> | <input type="radio"/> | <input type="radio"/> |
| Dry eyes                                                                                    | <input type="radio"/> | <input type="radio"/> | <input type="radio"/> | <input type="radio"/> | <input type="radio"/> |
| Dry or peeling skin                                                                         | <input type="radio"/> | <input type="radio"/> | <input type="radio"/> | <input type="radio"/> | <input type="radio"/> |
| Dry scalp or dandruff                                                                       | <input type="radio"/> | <input type="radio"/> | <input type="radio"/> | <input type="radio"/> | <input type="radio"/> |
| Dry throat                                                                                  | <input type="radio"/> | <input type="radio"/> | <input type="radio"/> | <input type="radio"/> | <input type="radio"/> |
| Ear pain/earache                                                                            | <input type="radio"/> | <input type="radio"/> | <input type="radio"/> | <input type="radio"/> | <input type="radio"/> |
| Elevated thyroid hormones                                                                   | <input type="radio"/> | <input type="radio"/> | <input type="radio"/> | <input type="radio"/> | <input type="radio"/> |
| Extreme pressure at base of head or occipital nerve                                         | <input type="radio"/> | <input type="radio"/> | <input type="radio"/> | <input type="radio"/> | <input type="radio"/> |
| Eye stye or infection                                                                       | <input type="radio"/> | <input type="radio"/> | <input type="radio"/> | <input type="radio"/> | <input type="radio"/> |
| Fatigue                                                                                     | <input type="radio"/> | <input type="radio"/> | <input type="radio"/> | <input type="radio"/> | <input type="radio"/> |
| Feeling irritable                                                                           | <input type="radio"/> | <input type="radio"/> | <input type="radio"/> | <input type="radio"/> | <input type="radio"/> |
| Feeling of burning skin                                                                     | <input type="radio"/> | <input type="radio"/> | <input type="radio"/> | <input type="radio"/> | <input type="radio"/> |
| Fever or chills                                                                             | <input type="radio"/> | <input type="radio"/> | <input type="radio"/> | <input type="radio"/> | <input type="radio"/> |
| Floaters or flashes of light in vision                                                      | <input type="radio"/> | <input type="radio"/> | <input type="radio"/> | <input type="radio"/> | <input type="radio"/> |
| Foot pain                                                                                   | <input type="radio"/> | <input type="radio"/> | <input type="radio"/> | <input type="radio"/> | <input type="radio"/> |
| GERD (acid reflux) with excessive salivation                                                | <input type="radio"/> | <input type="radio"/> | <input type="radio"/> | <input type="radio"/> | <input type="radio"/> |
| Goiter or lump in throat                                                                    | <input type="radio"/> | <input type="radio"/> | <input type="radio"/> | <input type="radio"/> | <input type="radio"/> |
| Hair loss                                                                                   | <input type="radio"/> | <input type="radio"/> | <input type="radio"/> | <input type="radio"/> | <input type="radio"/> |
| Hand or wrist pain                                                                          | <input type="radio"/> | <input type="radio"/> | <input type="radio"/> | <input type="radio"/> | <input type="radio"/> |
| Headache                                                                                    | <input type="radio"/> | <input type="radio"/> | <input type="radio"/> | <input type="radio"/> | <input type="radio"/> |
| Heart palpitations (heart skipping a beat or racing)                                        | <input type="radio"/> | <input type="radio"/> | <input type="radio"/> | <input type="radio"/> | <input type="radio"/> |
| Heat intolerance                                                                            | <input type="radio"/> | <input type="radio"/> | <input type="radio"/> | <input type="radio"/> | <input type="radio"/> |
| High blood pressure                                                                         | <input type="radio"/> | <input type="radio"/> | <input type="radio"/> | <input type="radio"/> | <input type="radio"/> |

|                                                             |                       |                       |                       |                       |                       |
|-------------------------------------------------------------|-----------------------|-----------------------|-----------------------|-----------------------|-----------------------|
| Hormone imbalances                                          | <input type="radio"/> | <input type="radio"/> | <input type="radio"/> | <input type="radio"/> | <input type="radio"/> |
| "Hot" blood rush                                            | <input type="radio"/> | <input type="radio"/> | <input type="radio"/> | <input type="radio"/> | <input type="radio"/> |
| Inability to cry                                            | <input type="radio"/> | <input type="radio"/> | <input type="radio"/> | <input type="radio"/> | <input type="radio"/> |
| Inability to exercise or be active                          | <input type="radio"/> | <input type="radio"/> | <input type="radio"/> | <input type="radio"/> | <input type="radio"/> |
| Inability to yawn                                           | <input type="radio"/> | <input type="radio"/> | <input type="radio"/> | <input type="radio"/> | <input type="radio"/> |
| Internal tremors or buzzing/vibration                       | <input type="radio"/> | <input type="radio"/> | <input type="radio"/> | <input type="radio"/> | <input type="radio"/> |
| Irregular or skipped menstrual cycles                       | <input type="radio"/> | <input type="radio"/> | <input type="radio"/> | <input type="radio"/> | <input type="radio"/> |
| Jaw pain                                                    | <input type="radio"/> | <input type="radio"/> | <input type="radio"/> | <input type="radio"/> | <input type="radio"/> |
| Joint pain                                                  | <input type="radio"/> | <input type="radio"/> | <input type="radio"/> | <input type="radio"/> | <input type="radio"/> |
| Kidney issues or protein in urine                           | <input type="radio"/> | <input type="radio"/> | <input type="radio"/> | <input type="radio"/> | <input type="radio"/> |
| Kidney pain                                                 | <input type="radio"/> | <input type="radio"/> | <input type="radio"/> | <input type="radio"/> | <input type="radio"/> |
| Low blood oxygen                                            | <input type="radio"/> | <input type="radio"/> | <input type="radio"/> | <input type="radio"/> | <input type="radio"/> |
| Low blood pressure                                          | <input type="radio"/> | <input type="radio"/> | <input type="radio"/> | <input type="radio"/> | <input type="radio"/> |
| Lower back pain                                             | <input type="radio"/> | <input type="radio"/> | <input type="radio"/> | <input type="radio"/> | <input type="radio"/> |
| Loss of appetite                                            | <input type="radio"/> | <input type="radio"/> | <input type="radio"/> | <input type="radio"/> | <input type="radio"/> |
| Loss of hearing                                             | <input type="radio"/> | <input type="radio"/> | <input type="radio"/> | <input type="radio"/> | <input type="radio"/> |
| Loss or decrease in quality of vision                       | <input type="radio"/> | <input type="radio"/> | <input type="radio"/> | <input type="radio"/> | <input type="radio"/> |
| Lump in throat/difficulty swallowing                        | <input type="radio"/> | <input type="radio"/> | <input type="radio"/> | <input type="radio"/> | <input type="radio"/> |
| Memory problems                                             | <input type="radio"/> | <input type="radio"/> | <input type="radio"/> | <input type="radio"/> | <input type="radio"/> |
| Menstrual cycles that are heavier or lighter than normal    | <input type="radio"/> | <input type="radio"/> | <input type="radio"/> | <input type="radio"/> | <input type="radio"/> |
| Mid-back pain at base of ribs                               | <input type="radio"/> | <input type="radio"/> | <input type="radio"/> | <input type="radio"/> | <input type="radio"/> |
| Mouth sores or sore tongue                                  | <input type="radio"/> | <input type="radio"/> | <input type="radio"/> | <input type="radio"/> | <input type="radio"/> |
| Muscle or body aches                                        | <input type="radio"/> | <input type="radio"/> | <input type="radio"/> | <input type="radio"/> | <input type="radio"/> |
| Muscle twitching                                            | <input type="radio"/> | <input type="radio"/> | <input type="radio"/> | <input type="radio"/> | <input type="radio"/> |
| Nausea or vomiting                                          | <input type="radio"/> | <input type="radio"/> | <input type="radio"/> | <input type="radio"/> | <input type="radio"/> |
| Neck muscle pain                                            | <input type="radio"/> | <input type="radio"/> | <input type="radio"/> | <input type="radio"/> | <input type="radio"/> |
| Nerve pain                                                  | <input type="radio"/> | <input type="radio"/> | <input type="radio"/> | <input type="radio"/> | <input type="radio"/> |
| Nerve sensations (tingling, pins and needles, numbness)     | <input type="radio"/> | <input type="radio"/> | <input type="radio"/> | <input type="radio"/> | <input type="radio"/> |
| Neuropathy in feet and hands (weakness, numbness, and pain) | <input type="radio"/> | <input type="radio"/> | <input type="radio"/> | <input type="radio"/> | <input type="radio"/> |
| New allergies                                               | <input type="radio"/> | <input type="radio"/> | <input type="radio"/> | <input type="radio"/> | <input type="radio"/> |
| Night sweats                                                | <input type="radio"/> | <input type="radio"/> | <input type="radio"/> | <input type="radio"/> | <input type="radio"/> |
| Nightmares                                                  | <input type="radio"/> | <input type="radio"/> | <input type="radio"/> | <input type="radio"/> | <input type="radio"/> |
| Painful scalp                                               | <input type="radio"/> | <input type="radio"/> | <input type="radio"/> | <input type="radio"/> | <input type="radio"/> |

|                                                                                 |                       |                       |                       |                       |                       |
|---------------------------------------------------------------------------------|-----------------------|-----------------------|-----------------------|-----------------------|-----------------------|
| Partial or complete loss of sense of smell                                      | <input type="radio"/> | <input type="radio"/> | <input type="radio"/> | <input type="radio"/> | <input type="radio"/> |
| Partial or complete loss of sense of taste                                      | <input type="radio"/> | <input type="radio"/> | <input type="radio"/> | <input type="radio"/> | <input type="radio"/> |
| Persistent chest pain or pressure                                               | <input type="radio"/> | <input type="radio"/> | <input type="radio"/> | <input type="radio"/> | <input type="radio"/> |
| Personality change (drastic)                                                    | <input type="radio"/> | <input type="radio"/> | <input type="radio"/> | <input type="radio"/> | <input type="radio"/> |
| Petechiae (pinpoint rash)                                                       | <input type="radio"/> | <input type="radio"/> | <input type="radio"/> | <input type="radio"/> | <input type="radio"/> |
| Phantom smells                                                                  | <input type="radio"/> | <input type="radio"/> | <input type="radio"/> | <input type="radio"/> | <input type="radio"/> |
| Phlegm in back of throat                                                        | <input type="radio"/> | <input type="radio"/> | <input type="radio"/> | <input type="radio"/> | <input type="radio"/> |
| Post-exertional malaise (worsened symptoms or flu-like symptoms after exertion) | <input type="radio"/> | <input type="radio"/> | <input type="radio"/> | <input type="radio"/> | <input type="radio"/> |
| Postnasal drip                                                                  | <input type="radio"/> | <input type="radio"/> | <input type="radio"/> | <input type="radio"/> | <input type="radio"/> |
| Rash                                                                            | <input type="radio"/> | <input type="radio"/> | <input type="radio"/> | <input type="radio"/> | <input type="radio"/> |
| Reflux or heartburn                                                             | <input type="radio"/> | <input type="radio"/> | <input type="radio"/> | <input type="radio"/> | <input type="radio"/> |
| Runny nose                                                                      | <input type="radio"/> | <input type="radio"/> | <input type="radio"/> | <input type="radio"/> | <input type="radio"/> |
| Sadness                                                                         | <input type="radio"/> | <input type="radio"/> | <input type="radio"/> | <input type="radio"/> | <input type="radio"/> |
| Seizures                                                                        | <input type="radio"/> | <input type="radio"/> | <input type="radio"/> | <input type="radio"/> | <input type="radio"/> |
| Sharp or sudden chest pain                                                      | <input type="radio"/> | <input type="radio"/> | <input type="radio"/> | <input type="radio"/> | <input type="radio"/> |
| Shortness of breath or difficulty breathing                                     | <input type="radio"/> | <input type="radio"/> | <input type="radio"/> | <input type="radio"/> | <input type="radio"/> |
| Shortness of breath or exhaustion from bending over                             | <input type="radio"/> | <input type="radio"/> | <input type="radio"/> | <input type="radio"/> | <input type="radio"/> |
| Sleeping more than normal                                                       | <input type="radio"/> | <input type="radio"/> | <input type="radio"/> | <input type="radio"/> | <input type="radio"/> |
| Sore throat                                                                     | <input type="radio"/> | <input type="radio"/> | <input type="radio"/> | <input type="radio"/> | <input type="radio"/> |
| Spinal issues                                                                   | <input type="radio"/> | <input type="radio"/> | <input type="radio"/> | <input type="radio"/> | <input type="radio"/> |
| Spikes in blood pressure                                                        | <input type="radio"/> | <input type="radio"/> | <input type="radio"/> | <input type="radio"/> | <input type="radio"/> |
| Swollen hands or feet                                                           | <input type="radio"/> | <input type="radio"/> | <input type="radio"/> | <input type="radio"/> | <input type="radio"/> |
| Swollen lymph nodes                                                             | <input type="radio"/> | <input type="radio"/> | <input type="radio"/> | <input type="radio"/> | <input type="radio"/> |
| Syncope (fainting)                                                              | <input type="radio"/> | <input type="radio"/> | <input type="radio"/> | <input type="radio"/> | <input type="radio"/> |
| Tachycardia (rapid heartbeat) at rest                                           | <input type="radio"/> | <input type="radio"/> | <input type="radio"/> | <input type="radio"/> | <input type="radio"/> |
| Tachycardia (rapid heartbeat) after standing up                                 | <input type="radio"/> | <input type="radio"/> | <input type="radio"/> | <input type="radio"/> | <input type="radio"/> |
| Thrush (white fungal infection in the mouth or throat)                          | <input type="radio"/> | <input type="radio"/> | <input type="radio"/> | <input type="radio"/> | <input type="radio"/> |
| Tinnitus or humming in ears                                                     | <input type="radio"/> | <input type="radio"/> | <input type="radio"/> | <input type="radio"/> | <input type="radio"/> |
| Tremors or shakiness                                                            | <input type="radio"/> | <input type="radio"/> | <input type="radio"/> | <input type="radio"/> | <input type="radio"/> |
| Upper back pain                                                                 | <input type="radio"/> | <input type="radio"/> | <input type="radio"/> | <input type="radio"/> | <input type="radio"/> |
| UTI (urinary tract infection)                                                   | <input type="radio"/> | <input type="radio"/> | <input type="radio"/> | <input type="radio"/> | <input type="radio"/> |
| Weakened neck                                                                   | <input type="radio"/> | <input type="radio"/> | <input type="radio"/> | <input type="radio"/> | <input type="radio"/> |

Weight gain

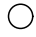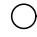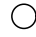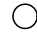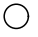

**Since [vaccine\_arm\_1][v\_v\_vax\_date], while experiencing the symptom, how much did it impair your social or family functioning compared to pre-COVID?**

**\*If you have not experienced these symptoms since your vaccine, please choose "Not at all"**

|                                                                                       | Not at all            | A little bit          | Somewhat              | Quite a bit           | Very much             |
|---------------------------------------------------------------------------------------|-----------------------|-----------------------|-----------------------|-----------------------|-----------------------|
| Abdominal pain                                                                        | <input type="radio"/> | <input type="radio"/> | <input type="radio"/> | <input type="radio"/> | <input type="radio"/> |
| Abnormally low temperature                                                            | <input type="radio"/> | <input type="radio"/> | <input type="radio"/> | <input type="radio"/> | <input type="radio"/> |
| Acid reflux                                                                           | <input type="radio"/> | <input type="radio"/> | <input type="radio"/> | <input type="radio"/> | <input type="radio"/> |
| Afternoon or evening fevers/low-grade fevers                                          | <input type="radio"/> | <input type="radio"/> | <input type="radio"/> | <input type="radio"/> | <input type="radio"/> |
| Anemia (low number of red blood cells)                                                | <input type="radio"/> | <input type="radio"/> | <input type="radio"/> | <input type="radio"/> | <input type="radio"/> |
| Anxiety                                                                               | <input type="radio"/> | <input type="radio"/> | <input type="radio"/> | <input type="radio"/> | <input type="radio"/> |
| Arrhythmia (improper beating of the heart due to electrical impulse problems)         | <input type="radio"/> | <input type="radio"/> | <input type="radio"/> | <input type="radio"/> | <input type="radio"/> |
| Bilateral neck throbbing around lymph nodes                                           | <input type="radio"/> | <input type="radio"/> | <input type="radio"/> | <input type="radio"/> | <input type="radio"/> |
| Blurry vision                                                                         | <input type="radio"/> | <input type="radio"/> | <input type="radio"/> | <input type="radio"/> | <input type="radio"/> |
| Bone aches in extremities                                                             | <input type="radio"/> | <input type="radio"/> | <input type="radio"/> | <input type="radio"/> | <input type="radio"/> |
| Brain fog                                                                             | <input type="radio"/> | <input type="radio"/> | <input type="radio"/> | <input type="radio"/> | <input type="radio"/> |
| Brain pressure                                                                        | <input type="radio"/> | <input type="radio"/> | <input type="radio"/> | <input type="radio"/> | <input type="radio"/> |
| Bulging veins                                                                         | <input type="radio"/> | <input type="radio"/> | <input type="radio"/> | <input type="radio"/> | <input type="radio"/> |
| Burning sensations                                                                    | <input type="radio"/> | <input type="radio"/> | <input type="radio"/> | <input type="radio"/> | <input type="radio"/> |
| Bruising of skin                                                                      | <input type="radio"/> | <input type="radio"/> | <input type="radio"/> | <input type="radio"/> | <input type="radio"/> |
| Calf cramps                                                                           | <input type="radio"/> | <input type="radio"/> | <input type="radio"/> | <input type="radio"/> | <input type="radio"/> |
| Change in nails (i.e. white spots, brittleness, change in moons)                      | <input type="radio"/> | <input type="radio"/> | <input type="radio"/> | <input type="radio"/> | <input type="radio"/> |
| Changes in voice                                                                      | <input type="radio"/> | <input type="radio"/> | <input type="radio"/> | <input type="radio"/> | <input type="radio"/> |
| Changed sense of taste                                                                | <input type="radio"/> | <input type="radio"/> | <input type="radio"/> | <input type="radio"/> | <input type="radio"/> |
| Chills but no fever                                                                   | <input type="radio"/> | <input type="radio"/> | <input type="radio"/> | <input type="radio"/> | <input type="radio"/> |
| Clogged ears                                                                          | <input type="radio"/> | <input type="radio"/> | <input type="radio"/> | <input type="radio"/> | <input type="radio"/> |
| Cold burning feeling in lungs                                                         | <input type="radio"/> | <input type="radio"/> | <input type="radio"/> | <input type="radio"/> | <input type="radio"/> |
| Confusion                                                                             | <input type="radio"/> | <input type="radio"/> | <input type="radio"/> | <input type="radio"/> | <input type="radio"/> |
| Congested or runny nose                                                               | <input type="radio"/> | <input type="radio"/> | <input type="radio"/> | <input type="radio"/> | <input type="radio"/> |
| Constant thirst                                                                       | <input type="radio"/> | <input type="radio"/> | <input type="radio"/> | <input type="radio"/> | <input type="radio"/> |
| Costochondritis (inflammation of the cartilage that connects a rib to the breastbone) | <input type="radio"/> | <input type="radio"/> | <input type="radio"/> | <input type="radio"/> | <input type="radio"/> |
| Cough                                                                                 | <input type="radio"/> | <input type="radio"/> | <input type="radio"/> | <input type="radio"/> | <input type="radio"/> |

|                                                                                             |                       |                       |                       |                       |                       |
|---------------------------------------------------------------------------------------------|-----------------------|-----------------------|-----------------------|-----------------------|-----------------------|
| Coughing up blood                                                                           | <input type="radio"/> | <input type="radio"/> | <input type="radio"/> | <input type="radio"/> | <input type="radio"/> |
| Covid toes (tender or itchy rash or chilblains on the toes or foot)                         | <input type="radio"/> | <input type="radio"/> | <input type="radio"/> | <input type="radio"/> | <input type="radio"/> |
| Cracked or dry lips                                                                         | <input type="radio"/> | <input type="radio"/> | <input type="radio"/> | <input type="radio"/> | <input type="radio"/> |
| Dental problems (i.e. chipped tooth, tooth loss)                                            | <input type="radio"/> | <input type="radio"/> | <input type="radio"/> | <input type="radio"/> | <input type="radio"/> |
| Diarrhea                                                                                    | <input type="radio"/> | <input type="radio"/> | <input type="radio"/> | <input type="radio"/> | <input type="radio"/> |
| Difficulty concentrating or focusing                                                        | <input type="radio"/> | <input type="radio"/> | <input type="radio"/> | <input type="radio"/> | <input type="radio"/> |
| Difficulty sleeping                                                                         | <input type="radio"/> | <input type="radio"/> | <input type="radio"/> | <input type="radio"/> | <input type="radio"/> |
| Difficulty speaking properly                                                                | <input type="radio"/> | <input type="radio"/> | <input type="radio"/> | <input type="radio"/> | <input type="radio"/> |
| Discoloration of the skin (for example: purple or blue on the hands or feet, no blistering) | <input type="radio"/> | <input type="radio"/> | <input type="radio"/> | <input type="radio"/> | <input type="radio"/> |
| Dizziness                                                                                   | <input type="radio"/> | <input type="radio"/> | <input type="radio"/> | <input type="radio"/> | <input type="radio"/> |
| Dry eyes                                                                                    | <input type="radio"/> | <input type="radio"/> | <input type="radio"/> | <input type="radio"/> | <input type="radio"/> |
| Dry or peeling skin                                                                         | <input type="radio"/> | <input type="radio"/> | <input type="radio"/> | <input type="radio"/> | <input type="radio"/> |
| Dry scalp or dandruff                                                                       | <input type="radio"/> | <input type="radio"/> | <input type="radio"/> | <input type="radio"/> | <input type="radio"/> |
| Dry throat                                                                                  | <input type="radio"/> | <input type="radio"/> | <input type="radio"/> | <input type="radio"/> | <input type="radio"/> |
| Ear pain/earache                                                                            | <input type="radio"/> | <input type="radio"/> | <input type="radio"/> | <input type="radio"/> | <input type="radio"/> |
| Elevated thyroid hormones                                                                   | <input type="radio"/> | <input type="radio"/> | <input type="radio"/> | <input type="radio"/> | <input type="radio"/> |
| Extreme pressure at base of head or occipital nerve                                         | <input type="radio"/> | <input type="radio"/> | <input type="radio"/> | <input type="radio"/> | <input type="radio"/> |
| Eye stye or infection                                                                       | <input type="radio"/> | <input type="radio"/> | <input type="radio"/> | <input type="radio"/> | <input type="radio"/> |
| Fatigue                                                                                     | <input type="radio"/> | <input type="radio"/> | <input type="radio"/> | <input type="radio"/> | <input type="radio"/> |
| Feeling irritable                                                                           | <input type="radio"/> | <input type="radio"/> | <input type="radio"/> | <input type="radio"/> | <input type="radio"/> |
| Feeling of burning skin                                                                     | <input type="radio"/> | <input type="radio"/> | <input type="radio"/> | <input type="radio"/> | <input type="radio"/> |
| Fever or chills                                                                             | <input type="radio"/> | <input type="radio"/> | <input type="radio"/> | <input type="radio"/> | <input type="radio"/> |
| Floaters or flashes of light in vision                                                      | <input type="radio"/> | <input type="radio"/> | <input type="radio"/> | <input type="radio"/> | <input type="radio"/> |
| Foot pain                                                                                   | <input type="radio"/> | <input type="radio"/> | <input type="radio"/> | <input type="radio"/> | <input type="radio"/> |
| GERD (acid reflux) with excessive salivation                                                | <input type="radio"/> | <input type="radio"/> | <input type="radio"/> | <input type="radio"/> | <input type="radio"/> |
| Goiter or lump in throat                                                                    | <input type="radio"/> | <input type="radio"/> | <input type="radio"/> | <input type="radio"/> | <input type="radio"/> |
| Hair loss                                                                                   | <input type="radio"/> | <input type="radio"/> | <input type="radio"/> | <input type="radio"/> | <input type="radio"/> |
| Hand or wrist pain                                                                          | <input type="radio"/> | <input type="radio"/> | <input type="radio"/> | <input type="radio"/> | <input type="radio"/> |
| Headache                                                                                    | <input type="radio"/> | <input type="radio"/> | <input type="radio"/> | <input type="radio"/> | <input type="radio"/> |
| Heart palpitations (heart skipping a beat or racing)                                        | <input type="radio"/> | <input type="radio"/> | <input type="radio"/> | <input type="radio"/> | <input type="radio"/> |
| Heat intolerance                                                                            | <input type="radio"/> | <input type="radio"/> | <input type="radio"/> | <input type="radio"/> | <input type="radio"/> |
| High blood pressure                                                                         | <input type="radio"/> | <input type="radio"/> | <input type="radio"/> | <input type="radio"/> | <input type="radio"/> |



|                                                             |                       |                       |                       |                       |                       |
|-------------------------------------------------------------|-----------------------|-----------------------|-----------------------|-----------------------|-----------------------|
| Hormone imbalances                                          | <input type="radio"/> | <input type="radio"/> | <input type="radio"/> | <input type="radio"/> | <input type="radio"/> |
| "Hot" blood rush                                            | <input type="radio"/> | <input type="radio"/> | <input type="radio"/> | <input type="radio"/> | <input type="radio"/> |
| Inability to cry                                            | <input type="radio"/> | <input type="radio"/> | <input type="radio"/> | <input type="radio"/> | <input type="radio"/> |
| Inability to exercise or be active                          | <input type="radio"/> | <input type="radio"/> | <input type="radio"/> | <input type="radio"/> | <input type="radio"/> |
| Inability to yawn                                           | <input type="radio"/> | <input type="radio"/> | <input type="radio"/> | <input type="radio"/> | <input type="radio"/> |
| Internal tremors or buzzing/vibration                       | <input type="radio"/> | <input type="radio"/> | <input type="radio"/> | <input type="radio"/> | <input type="radio"/> |
| Irregular or skipped menstrual cycles                       | <input type="radio"/> | <input type="radio"/> | <input type="radio"/> | <input type="radio"/> | <input type="radio"/> |
| Jaw pain                                                    | <input type="radio"/> | <input type="radio"/> | <input type="radio"/> | <input type="radio"/> | <input type="radio"/> |
| Joint pain                                                  | <input type="radio"/> | <input type="radio"/> | <input type="radio"/> | <input type="radio"/> | <input type="radio"/> |
| Kidney issues or protein in urine                           | <input type="radio"/> | <input type="radio"/> | <input type="radio"/> | <input type="radio"/> | <input type="radio"/> |
| Kidney pain                                                 | <input type="radio"/> | <input type="radio"/> | <input type="radio"/> | <input type="radio"/> | <input type="radio"/> |
| Low blood oxygen                                            | <input type="radio"/> | <input type="radio"/> | <input type="radio"/> | <input type="radio"/> | <input type="radio"/> |
| Low blood pressure                                          | <input type="radio"/> | <input type="radio"/> | <input type="radio"/> | <input type="radio"/> | <input type="radio"/> |
| Lower back pain                                             | <input type="radio"/> | <input type="radio"/> | <input type="radio"/> | <input type="radio"/> | <input type="radio"/> |
| Loss of appetite                                            | <input type="radio"/> | <input type="radio"/> | <input type="radio"/> | <input type="radio"/> | <input type="radio"/> |
| Loss of hearing                                             | <input type="radio"/> | <input type="radio"/> | <input type="radio"/> | <input type="radio"/> | <input type="radio"/> |
| Loss or decrease in quality of vision                       | <input type="radio"/> | <input type="radio"/> | <input type="radio"/> | <input type="radio"/> | <input type="radio"/> |
| Lump in throat/difficulty swallowing                        | <input type="radio"/> | <input type="radio"/> | <input type="radio"/> | <input type="radio"/> | <input type="radio"/> |
| Memory problems                                             | <input type="radio"/> | <input type="radio"/> | <input type="radio"/> | <input type="radio"/> | <input type="radio"/> |
| Menstrual cycles that are heavier or lighter than normal    | <input type="radio"/> | <input type="radio"/> | <input type="radio"/> | <input type="radio"/> | <input type="radio"/> |
| Mid-back pain at base of ribs                               | <input type="radio"/> | <input type="radio"/> | <input type="radio"/> | <input type="radio"/> | <input type="radio"/> |
| Mouth sores or sore tongue                                  | <input type="radio"/> | <input type="radio"/> | <input type="radio"/> | <input type="radio"/> | <input type="radio"/> |
| Muscle or body aches                                        | <input type="radio"/> | <input type="radio"/> | <input type="radio"/> | <input type="radio"/> | <input type="radio"/> |
| Muscle twitching                                            | <input type="radio"/> | <input type="radio"/> | <input type="radio"/> | <input type="radio"/> | <input type="radio"/> |
| Nausea or vomiting                                          | <input type="radio"/> | <input type="radio"/> | <input type="radio"/> | <input type="radio"/> | <input type="radio"/> |
| Neck muscle pain                                            | <input type="radio"/> | <input type="radio"/> | <input type="radio"/> | <input type="radio"/> | <input type="radio"/> |
| Nerve pain                                                  | <input type="radio"/> | <input type="radio"/> | <input type="radio"/> | <input type="radio"/> | <input type="radio"/> |
| Nerve sensations (tingling, pins and needles, numbness)     | <input type="radio"/> | <input type="radio"/> | <input type="radio"/> | <input type="radio"/> | <input type="radio"/> |
| Neuropathy in feet and hands (weakness, numbness, and pain) | <input type="radio"/> | <input type="radio"/> | <input type="radio"/> | <input type="radio"/> | <input type="radio"/> |
| New allergies                                               | <input type="radio"/> | <input type="radio"/> | <input type="radio"/> | <input type="radio"/> | <input type="radio"/> |
| Night sweats                                                | <input type="radio"/> | <input type="radio"/> | <input type="radio"/> | <input type="radio"/> | <input type="radio"/> |
| Nightmares                                                  | <input type="radio"/> | <input type="radio"/> | <input type="radio"/> | <input type="radio"/> | <input type="radio"/> |
| Painful scalp                                               | <input type="radio"/> | <input type="radio"/> | <input type="radio"/> | <input type="radio"/> | <input type="radio"/> |

|                                                                                 |                       |                       |                       |                       |                       |
|---------------------------------------------------------------------------------|-----------------------|-----------------------|-----------------------|-----------------------|-----------------------|
| Partial or complete loss of sense of smell                                      | <input type="radio"/> | <input type="radio"/> | <input type="radio"/> | <input type="radio"/> | <input type="radio"/> |
| Partial or complete loss of sense of taste                                      | <input type="radio"/> | <input type="radio"/> | <input type="radio"/> | <input type="radio"/> | <input type="radio"/> |
| Persistent chest pain or pressure                                               | <input type="radio"/> | <input type="radio"/> | <input type="radio"/> | <input type="radio"/> | <input type="radio"/> |
| Personality change (drastic)                                                    | <input type="radio"/> | <input type="radio"/> | <input type="radio"/> | <input type="radio"/> | <input type="radio"/> |
| Petechiae (pinpoint rash)                                                       | <input type="radio"/> | <input type="radio"/> | <input type="radio"/> | <input type="radio"/> | <input type="radio"/> |
| Phantom smells                                                                  | <input type="radio"/> | <input type="radio"/> | <input type="radio"/> | <input type="radio"/> | <input type="radio"/> |
| Phlegm in back of throat                                                        | <input type="radio"/> | <input type="radio"/> | <input type="radio"/> | <input type="radio"/> | <input type="radio"/> |
| Post-exertional malaise (worsened symptoms or flu-like symptoms after exertion) | <input type="radio"/> | <input type="radio"/> | <input type="radio"/> | <input type="radio"/> | <input type="radio"/> |
| Postnasal drip                                                                  | <input type="radio"/> | <input type="radio"/> | <input type="radio"/> | <input type="radio"/> | <input type="radio"/> |
| Rash                                                                            | <input type="radio"/> | <input type="radio"/> | <input type="radio"/> | <input type="radio"/> | <input type="radio"/> |
| Reflux or heartburn                                                             | <input type="radio"/> | <input type="radio"/> | <input type="radio"/> | <input type="radio"/> | <input type="radio"/> |
| Runny nose                                                                      | <input type="radio"/> | <input type="radio"/> | <input type="radio"/> | <input type="radio"/> | <input type="radio"/> |
| Sadness                                                                         | <input type="radio"/> | <input type="radio"/> | <input type="radio"/> | <input type="radio"/> | <input type="radio"/> |
| Seizures                                                                        | <input type="radio"/> | <input type="radio"/> | <input type="radio"/> | <input type="radio"/> | <input type="radio"/> |
| Sharp or sudden chest pain                                                      | <input type="radio"/> | <input type="radio"/> | <input type="radio"/> | <input type="radio"/> | <input type="radio"/> |
| Shortness of breath or difficulty breathing                                     | <input type="radio"/> | <input type="radio"/> | <input type="radio"/> | <input type="radio"/> | <input type="radio"/> |
| Shortness of breath or exhaustion from bending over                             | <input type="radio"/> | <input type="radio"/> | <input type="radio"/> | <input type="radio"/> | <input type="radio"/> |
| Sleeping more than normal                                                       | <input type="radio"/> | <input type="radio"/> | <input type="radio"/> | <input type="radio"/> | <input type="radio"/> |
| Sore throat                                                                     | <input type="radio"/> | <input type="radio"/> | <input type="radio"/> | <input type="radio"/> | <input type="radio"/> |
| Spinal issues                                                                   | <input type="radio"/> | <input type="radio"/> | <input type="radio"/> | <input type="radio"/> | <input type="radio"/> |
| Spikes in blood pressure                                                        | <input type="radio"/> | <input type="radio"/> | <input type="radio"/> | <input type="radio"/> | <input type="radio"/> |
| Swollen hands or feet                                                           | <input type="radio"/> | <input type="radio"/> | <input type="radio"/> | <input type="radio"/> | <input type="radio"/> |
| Swollen lymph nodes                                                             | <input type="radio"/> | <input type="radio"/> | <input type="radio"/> | <input type="radio"/> | <input type="radio"/> |
| Syncope (fainting)                                                              | <input type="radio"/> | <input type="radio"/> | <input type="radio"/> | <input type="radio"/> | <input type="radio"/> |
| Tachycardia (rapid heartbeat) at rest                                           | <input type="radio"/> | <input type="radio"/> | <input type="radio"/> | <input type="radio"/> | <input type="radio"/> |
| Tachycardia (rapid heartbeat) after standing up                                 | <input type="radio"/> | <input type="radio"/> | <input type="radio"/> | <input type="radio"/> | <input type="radio"/> |
| Thrush (white fungal infection in the mouth or throat)                          | <input type="radio"/> | <input type="radio"/> | <input type="radio"/> | <input type="radio"/> | <input type="radio"/> |
| Tinnitus or humming in ears                                                     | <input type="radio"/> | <input type="radio"/> | <input type="radio"/> | <input type="radio"/> | <input type="radio"/> |
| Tremors or shakiness                                                            | <input type="radio"/> | <input type="radio"/> | <input type="radio"/> | <input type="radio"/> | <input type="radio"/> |
| Upper back pain                                                                 | <input type="radio"/> | <input type="radio"/> | <input type="radio"/> | <input type="radio"/> | <input type="radio"/> |
| UTI (urinary tract infection)                                                   | <input type="radio"/> | <input type="radio"/> | <input type="radio"/> | <input type="radio"/> | <input type="radio"/> |
| Weakened neck                                                                   | <input type="radio"/> | <input type="radio"/> | <input type="radio"/> | <input type="radio"/> | <input type="radio"/> |

Weight gain

---

Are there any symptoms not listed above that you have experienced since you received the first dose of your vaccine on [vaccine\_arm\_1][v\_v\_vax\_date]?

---

\*Please list all if so

**Since you received the first dose of your vaccine on [vaccine\_arm\_1][v\_v\_vax\_date]**

|                                                   | 76-100% of health<br>before COVID-19 | 51-75% of health<br>before COVID-19 | 26-50% of health<br>before COVID-19 | 0-25% of health<br>before COVID-19 |
|---------------------------------------------------|--------------------------------------|-------------------------------------|-------------------------------------|------------------------------------|
| On your best days, would you say that you are at  | <input type="radio"/>                | <input type="radio"/>               | <input type="radio"/>               | <input type="radio"/>              |
| On your worst days, would you say that you are at | <input type="radio"/>                | <input type="radio"/>               | <input type="radio"/>               | <input type="radio"/>              |

Since you received the first dose of your vaccine on [vaccine\_arm\_1][v\_v\_vax\_date], would you say that your health is

- Better  
 Worse  
 The same  
 Don't know

Please, in the space below, share any information about your experience with COVID-19 or the vaccine that we might have missed.

---

## Survey 3

Thank you for taking Survey 3 for the Yale COVID Recovery Study!

Please remember that you may stop this survey and come back to it at any point. To return to the survey, please return to the link in your browser (or relick the link in your email).

You may also find it helpful to have the below items ready as you complete the survey. If you do not have these items, please still fill in the information as best you can.

Testing results: dates, type (PCR, antigen) and result of tests. If you do not remember the exact date, the estimated date is enough. Symptom time and severity: your symptom log. You will be asked to pick symptoms you have had since you began having COVID-19 symptoms.

---

Have you received your second dose of the COVID-19 vaccine?

- Yes \_\_\_\_\_  
 No, but it's scheduled  
 No, and I don't have an appointment scheduled

---

When did you receive your second dose of the COVID-19 vaccine?

\_\_\_\_\_

---

On your previous survey, you responded that you have experienced the following symptoms due to COVID-19 at some point in the past.

The following questions will ask about how these symptoms have changed, if at all. Please respond based on your experiences during the past month.

**During the past month (as compared to before one month ago), this symptom has been**

|                                                                                       | Better                | Worse                 | The same              |
|---------------------------------------------------------------------------------------|-----------------------|-----------------------|-----------------------|
| Abdominal pain                                                                        | <input type="radio"/> | <input type="radio"/> | <input type="radio"/> |
| Abnormally low temperature                                                            | <input type="radio"/> | <input type="radio"/> | <input type="radio"/> |
| Acid reflux                                                                           | <input type="radio"/> | <input type="radio"/> | <input type="radio"/> |
| Afternoon or evening fevers/low-grade fevers                                          | <input type="radio"/> | <input type="radio"/> | <input type="radio"/> |
| Anemia (low number of red blood cells)                                                | <input type="radio"/> | <input type="radio"/> | <input type="radio"/> |
| Anxiety                                                                               | <input type="radio"/> | <input type="radio"/> | <input type="radio"/> |
| Arrhythmia (improper beating of the heart due to electrical impulse problems)         | <input type="radio"/> | <input type="radio"/> | <input type="radio"/> |
| Bilateral neck throbbing around lymph nodes                                           | <input type="radio"/> | <input type="radio"/> | <input type="radio"/> |
| Blurry vision                                                                         | <input type="radio"/> | <input type="radio"/> | <input type="radio"/> |
| Bone aches in extremities                                                             | <input type="radio"/> | <input type="radio"/> | <input type="radio"/> |
| Brain fog                                                                             | <input type="radio"/> | <input type="radio"/> | <input type="radio"/> |
| Brain pressure                                                                        | <input type="radio"/> | <input type="radio"/> | <input type="radio"/> |
| Bulging veins                                                                         | <input type="radio"/> | <input type="radio"/> | <input type="radio"/> |
| Burning sensations                                                                    | <input type="radio"/> | <input type="radio"/> | <input type="radio"/> |
| Bruising of skin                                                                      | <input type="radio"/> | <input type="radio"/> | <input type="radio"/> |
| Calf cramps                                                                           | <input type="radio"/> | <input type="radio"/> | <input type="radio"/> |
| Change in nails (i.e. white spots, brittleness, change in moons)                      | <input type="radio"/> | <input type="radio"/> | <input type="radio"/> |
| Changes in voice                                                                      | <input type="radio"/> | <input type="radio"/> | <input type="radio"/> |
| Changed sense of taste                                                                | <input type="radio"/> | <input type="radio"/> | <input type="radio"/> |
| Chills but no fever                                                                   | <input type="radio"/> | <input type="radio"/> | <input type="radio"/> |
| Clogged ears                                                                          | <input type="radio"/> | <input type="radio"/> | <input type="radio"/> |
| Cold burning feeling in lungs                                                         | <input type="radio"/> | <input type="radio"/> | <input type="radio"/> |
| Confusion                                                                             | <input type="radio"/> | <input type="radio"/> | <input type="radio"/> |
| Congested or runny nose                                                               | <input type="radio"/> | <input type="radio"/> | <input type="radio"/> |
| Constant thirst                                                                       | <input type="radio"/> | <input type="radio"/> | <input type="radio"/> |
| Costochondritis (inflammation of the cartilage that connects a rib to the breastbone) | <input type="radio"/> | <input type="radio"/> | <input type="radio"/> |
| Cough                                                                                 | <input type="radio"/> | <input type="radio"/> | <input type="radio"/> |
| Coughing up blood                                                                     | <input type="radio"/> | <input type="radio"/> | <input type="radio"/> |
| Covid toes (tender or itchy rash or chilblains on the toes or foot)                   | <input type="radio"/> | <input type="radio"/> | <input type="radio"/> |

|                                                                                             |                       |                       |                       |
|---------------------------------------------------------------------------------------------|-----------------------|-----------------------|-----------------------|
| Cracked or dry lips                                                                         | <input type="radio"/> | <input type="radio"/> | <input type="radio"/> |
| Dental problems (i.e. chipped tooth, tooth loss)                                            | <input type="radio"/> | <input type="radio"/> | <input type="radio"/> |
| Diarrhea                                                                                    | <input type="radio"/> | <input type="radio"/> | <input type="radio"/> |
| Difficulty concentrating or focusing                                                        | <input type="radio"/> | <input type="radio"/> | <input type="radio"/> |
| Difficulty sleeping                                                                         | <input type="radio"/> | <input type="radio"/> | <input type="radio"/> |
| Difficulty speaking properly                                                                | <input type="radio"/> | <input type="radio"/> | <input type="radio"/> |
| Discoloration of the skin (for example: purple or blue on the hands or feet, no blistering) | <input type="radio"/> | <input type="radio"/> | <input type="radio"/> |
| Dizziness                                                                                   | <input type="radio"/> | <input type="radio"/> | <input type="radio"/> |
| Dry eyes                                                                                    | <input type="radio"/> | <input type="radio"/> | <input type="radio"/> |
| Dry or peeling skin                                                                         | <input type="radio"/> | <input type="radio"/> | <input type="radio"/> |
| Dry scalp or dandruff                                                                       | <input type="radio"/> | <input type="radio"/> | <input type="radio"/> |
| Dry throat                                                                                  | <input type="radio"/> | <input type="radio"/> | <input type="radio"/> |
| Ear pain/earache                                                                            | <input type="radio"/> | <input type="radio"/> | <input type="radio"/> |
| Elevated thyroid hormones                                                                   | <input type="radio"/> | <input type="radio"/> | <input type="radio"/> |
| Extreme pressure at base of head or occipital nerve                                         | <input type="radio"/> | <input type="radio"/> | <input type="radio"/> |
| Eye stye or infection                                                                       | <input type="radio"/> | <input type="radio"/> | <input type="radio"/> |
| Fatigue                                                                                     | <input type="radio"/> | <input type="radio"/> | <input type="radio"/> |
| Feeling irritable                                                                           | <input type="radio"/> | <input type="radio"/> | <input type="radio"/> |
| Feeling of burning skin                                                                     | <input type="radio"/> | <input type="radio"/> | <input type="radio"/> |
| Fever or chills                                                                             | <input type="radio"/> | <input type="radio"/> | <input type="radio"/> |
| Floaters or flashes of light in vision                                                      | <input type="radio"/> | <input type="radio"/> | <input type="radio"/> |
| Foot pain                                                                                   | <input type="radio"/> | <input type="radio"/> | <input type="radio"/> |
| GERD (acid reflux) with excessive salivation                                                | <input type="radio"/> | <input type="radio"/> | <input type="radio"/> |
| Goiter or lump in throat                                                                    | <input type="radio"/> | <input type="radio"/> | <input type="radio"/> |
| Hair loss                                                                                   | <input type="radio"/> | <input type="radio"/> | <input type="radio"/> |
| Hand or wrist pain                                                                          | <input type="radio"/> | <input type="radio"/> | <input type="radio"/> |
| Headache                                                                                    | <input type="radio"/> | <input type="radio"/> | <input type="radio"/> |
| Heart palpitations (heart skipping a beat or racing)                                        | <input type="radio"/> | <input type="radio"/> | <input type="radio"/> |
| Heat intolerance                                                                            | <input type="radio"/> | <input type="radio"/> | <input type="radio"/> |
| High blood pressure                                                                         | <input type="radio"/> | <input type="radio"/> | <input type="radio"/> |
| Hormone imbalances                                                                          | <input type="radio"/> | <input type="radio"/> | <input type="radio"/> |
| "Hot" blood rush                                                                            | <input type="radio"/> | <input type="radio"/> | <input type="radio"/> |
| Inability to cry                                                                            | <input type="radio"/> | <input type="radio"/> | <input type="radio"/> |

|                                                             |                       |                       |                       |
|-------------------------------------------------------------|-----------------------|-----------------------|-----------------------|
| Inability to exercise or be active                          | <input type="radio"/> | <input type="radio"/> | <input type="radio"/> |
| Inability to yawn                                           | <input type="radio"/> | <input type="radio"/> | <input type="radio"/> |
| Internal tremors or buzzing/vibration                       | <input type="radio"/> | <input type="radio"/> | <input type="radio"/> |
| Irregular or skipped menstrual cycles                       | <input type="radio"/> | <input type="radio"/> | <input type="radio"/> |
| Jaw pain                                                    | <input type="radio"/> | <input type="radio"/> | <input type="radio"/> |
| Joint pain                                                  | <input type="radio"/> | <input type="radio"/> | <input type="radio"/> |
| Kidney issues or protein in urine                           | <input type="radio"/> | <input type="radio"/> | <input type="radio"/> |
| Kidney pain                                                 | <input type="radio"/> | <input type="radio"/> | <input type="radio"/> |
| Low blood oxygen                                            | <input type="radio"/> | <input type="radio"/> | <input type="radio"/> |
| Low blood pressure                                          | <input type="radio"/> | <input type="radio"/> | <input type="radio"/> |
| Lower back pain                                             | <input type="radio"/> | <input type="radio"/> | <input type="radio"/> |
| Loss of appetite                                            | <input type="radio"/> | <input type="radio"/> | <input type="radio"/> |
| Loss of hearing                                             | <input type="radio"/> | <input type="radio"/> | <input type="radio"/> |
| Loss or decrease in quality of vision                       | <input type="radio"/> | <input type="radio"/> | <input type="radio"/> |
| Lump in throat/difficulty swallowing                        | <input type="radio"/> | <input type="radio"/> | <input type="radio"/> |
| Memory problems                                             | <input type="radio"/> | <input type="radio"/> | <input type="radio"/> |
| Menstrual cycles that are heavier or lighter than normal    | <input type="radio"/> | <input type="radio"/> | <input type="radio"/> |
| Mid-back pain at base of ribs                               | <input type="radio"/> | <input type="radio"/> | <input type="radio"/> |
| Mouth sores or sore tongue                                  | <input type="radio"/> | <input type="radio"/> | <input type="radio"/> |
| Muscle or body aches                                        | <input type="radio"/> | <input type="radio"/> | <input type="radio"/> |
| Muscle twitching                                            | <input type="radio"/> | <input type="radio"/> | <input type="radio"/> |
| Nausea or vomiting                                          | <input type="radio"/> | <input type="radio"/> | <input type="radio"/> |
| Neck muscle pain                                            | <input type="radio"/> | <input type="radio"/> | <input type="radio"/> |
| Nerve pain                                                  | <input type="radio"/> | <input type="radio"/> | <input type="radio"/> |
| Nerve sensations (tingling, pins and needles, numbness)     | <input type="radio"/> | <input type="radio"/> | <input type="radio"/> |
| Neuropathy in feet and hands (weakness, numbness, and pain) | <input type="radio"/> | <input type="radio"/> | <input type="radio"/> |
| New allergies                                               | <input type="radio"/> | <input type="radio"/> | <input type="radio"/> |
| Night sweats                                                | <input type="radio"/> | <input type="radio"/> | <input type="radio"/> |
| Nightmares                                                  | <input type="radio"/> | <input type="radio"/> | <input type="radio"/> |
| Painful scalp                                               | <input type="radio"/> | <input type="radio"/> | <input type="radio"/> |
| Partial or complete loss of sense of smell                  | <input type="radio"/> | <input type="radio"/> | <input type="radio"/> |
| Partial or complete loss of sense of taste                  | <input type="radio"/> | <input type="radio"/> | <input type="radio"/> |



|                                                                                       |                       |                       |                       |
|---------------------------------------------------------------------------------------|-----------------------|-----------------------|-----------------------|
| Persistent chest pain or pressure                                                     | <input type="radio"/> | <input type="radio"/> | <input type="radio"/> |
| Personality change (drastic)                                                          | <input type="radio"/> | <input type="radio"/> | <input type="radio"/> |
| Petechiae (pinpoint rash)                                                             | <input type="radio"/> | <input type="radio"/> | <input type="radio"/> |
| Phantom smells                                                                        | <input type="radio"/> | <input type="radio"/> | <input type="radio"/> |
| Phlegm in back of throat                                                              | <input type="radio"/> | <input type="radio"/> | <input type="radio"/> |
| Post-exertional malaise<br>(worsened symptoms or flu-like<br>symptoms after exertion) | <input type="radio"/> | <input type="radio"/> | <input type="radio"/> |
| Postnasal drip                                                                        | <input type="radio"/> | <input type="radio"/> | <input type="radio"/> |
| Rash                                                                                  | <input type="radio"/> | <input type="radio"/> | <input type="radio"/> |
| Reflux or heartburn                                                                   | <input type="radio"/> | <input type="radio"/> | <input type="radio"/> |
| Runny nose                                                                            | <input type="radio"/> | <input type="radio"/> | <input type="radio"/> |
| Sadness                                                                               | <input type="radio"/> | <input type="radio"/> | <input type="radio"/> |
| Seizures                                                                              | <input type="radio"/> | <input type="radio"/> | <input type="radio"/> |
| Sharp or sudden chest pain                                                            | <input type="radio"/> | <input type="radio"/> | <input type="radio"/> |
| Shortness of breath or difficulty<br>breathing                                        | <input type="radio"/> | <input type="radio"/> | <input type="radio"/> |
| Shortness of breath or<br>exhaustion from bending over                                | <input type="radio"/> | <input type="radio"/> | <input type="radio"/> |
| Sleeping more than normal                                                             | <input type="radio"/> | <input type="radio"/> | <input type="radio"/> |
| Sore throat                                                                           | <input type="radio"/> | <input type="radio"/> | <input type="radio"/> |
| Spinal issues                                                                         | <input type="radio"/> | <input type="radio"/> | <input type="radio"/> |
| Spikes in blood pressure                                                              | <input type="radio"/> | <input type="radio"/> | <input type="radio"/> |
| Swollen hands or feet                                                                 | <input type="radio"/> | <input type="radio"/> | <input type="radio"/> |
| Swollen lymph nodes                                                                   | <input type="radio"/> | <input type="radio"/> | <input type="radio"/> |
| Syncope (fainting)                                                                    | <input type="radio"/> | <input type="radio"/> | <input type="radio"/> |
| Tachycardia (rapid heartbeat) at<br>rest                                              | <input type="radio"/> | <input type="radio"/> | <input type="radio"/> |
| Tachycardia (rapid heartbeat)<br>after standing up                                    | <input type="radio"/> | <input type="radio"/> | <input type="radio"/> |
| Thrush (white fungal infection in<br>the mouth or throat)                             | <input type="radio"/> | <input type="radio"/> | <input type="radio"/> |
| Tinnitus or humming in ears                                                           | <input type="radio"/> | <input type="radio"/> | <input type="radio"/> |
| Tremors or shakiness                                                                  | <input type="radio"/> | <input type="radio"/> | <input type="radio"/> |
| Upper back pain                                                                       | <input type="radio"/> | <input type="radio"/> | <input type="radio"/> |
| UTI (urinary tract infection)                                                         | <input type="radio"/> | <input type="radio"/> | <input type="radio"/> |
| Weakened neck                                                                         | <input type="radio"/> | <input type="radio"/> | <input type="radio"/> |
| Weight gain                                                                           | <input type="radio"/> | <input type="radio"/> | <input type="radio"/> |

**During the past month, I have experienced the symptom, on average**

|                                                                                       | Never--it has gone away completely | Once a month          | Once or twice a week  | 3 or 4 times a week   | Most days             | All the time          |
|---------------------------------------------------------------------------------------|------------------------------------|-----------------------|-----------------------|-----------------------|-----------------------|-----------------------|
| Abdominal pain                                                                        | <input type="radio"/>              | <input type="radio"/> | <input type="radio"/> | <input type="radio"/> | <input type="radio"/> | <input type="radio"/> |
| Abnormally low temperature                                                            | <input type="radio"/>              | <input type="radio"/> | <input type="radio"/> | <input type="radio"/> | <input type="radio"/> | <input type="radio"/> |
| Acid reflux                                                                           | <input type="radio"/>              | <input type="radio"/> | <input type="radio"/> | <input type="radio"/> | <input type="radio"/> | <input type="radio"/> |
| Afternoon or evening fevers/low-grade fevers                                          | <input type="radio"/>              | <input type="radio"/> | <input type="radio"/> | <input type="radio"/> | <input type="radio"/> | <input type="radio"/> |
| Anemia (low number of red blood cells)                                                | <input type="radio"/>              | <input type="radio"/> | <input type="radio"/> | <input type="radio"/> | <input type="radio"/> | <input type="radio"/> |
| Anxiety                                                                               | <input type="radio"/>              | <input type="radio"/> | <input type="radio"/> | <input type="radio"/> | <input type="radio"/> | <input type="radio"/> |
| Arrhythmia (improper beating of the heart due to electrical impulse problems)         | <input type="radio"/>              | <input type="radio"/> | <input type="radio"/> | <input type="radio"/> | <input type="radio"/> | <input type="radio"/> |
| Bilateral neck throbbing around lymph nodes                                           | <input type="radio"/>              | <input type="radio"/> | <input type="radio"/> | <input type="radio"/> | <input type="radio"/> | <input type="radio"/> |
| Blurry vision                                                                         | <input type="radio"/>              | <input type="radio"/> | <input type="radio"/> | <input type="radio"/> | <input type="radio"/> | <input type="radio"/> |
| Bone aches in extremities                                                             | <input type="radio"/>              | <input type="radio"/> | <input type="radio"/> | <input type="radio"/> | <input type="radio"/> | <input type="radio"/> |
| Brain fog                                                                             | <input type="radio"/>              | <input type="radio"/> | <input type="radio"/> | <input type="radio"/> | <input type="radio"/> | <input type="radio"/> |
| Brain pressure                                                                        | <input type="radio"/>              | <input type="radio"/> | <input type="radio"/> | <input type="radio"/> | <input type="radio"/> | <input type="radio"/> |
| Bulging veins                                                                         | <input type="radio"/>              | <input type="radio"/> | <input type="radio"/> | <input type="radio"/> | <input type="radio"/> | <input type="radio"/> |
| Burning sensations                                                                    | <input type="radio"/>              | <input type="radio"/> | <input type="radio"/> | <input type="radio"/> | <input type="radio"/> | <input type="radio"/> |
| Bruising of skin                                                                      | <input type="radio"/>              | <input type="radio"/> | <input type="radio"/> | <input type="radio"/> | <input type="radio"/> | <input type="radio"/> |
| Calf cramps                                                                           | <input type="radio"/>              | <input type="radio"/> | <input type="radio"/> | <input type="radio"/> | <input type="radio"/> | <input type="radio"/> |
| Change in nails (i.e. white spots, brittleness, change in moons)                      | <input type="radio"/>              | <input type="radio"/> | <input type="radio"/> | <input type="radio"/> | <input type="radio"/> | <input type="radio"/> |
| Changes in voice                                                                      | <input type="radio"/>              | <input type="radio"/> | <input type="radio"/> | <input type="radio"/> | <input type="radio"/> | <input type="radio"/> |
| Changed sense of taste                                                                | <input type="radio"/>              | <input type="radio"/> | <input type="radio"/> | <input type="radio"/> | <input type="radio"/> | <input type="radio"/> |
| Chills but no fever                                                                   | <input type="radio"/>              | <input type="radio"/> | <input type="radio"/> | <input type="radio"/> | <input type="radio"/> | <input type="radio"/> |
| Clogged ears                                                                          | <input type="radio"/>              | <input type="radio"/> | <input type="radio"/> | <input type="radio"/> | <input type="radio"/> | <input type="radio"/> |
| Cold burning feeling in lungs                                                         | <input type="radio"/>              | <input type="radio"/> | <input type="radio"/> | <input type="radio"/> | <input type="radio"/> | <input type="radio"/> |
| Confusion                                                                             | <input type="radio"/>              | <input type="radio"/> | <input type="radio"/> | <input type="radio"/> | <input type="radio"/> | <input type="radio"/> |
| Congested or runny nose                                                               | <input type="radio"/>              | <input type="radio"/> | <input type="radio"/> | <input type="radio"/> | <input type="radio"/> | <input type="radio"/> |
| Constant thirst                                                                       | <input type="radio"/>              | <input type="radio"/> | <input type="radio"/> | <input type="radio"/> | <input type="radio"/> | <input type="radio"/> |
| Costochondritis (inflammation of the cartilage that connects a rib to the breastbone) | <input type="radio"/>              | <input type="radio"/> | <input type="radio"/> | <input type="radio"/> | <input type="radio"/> | <input type="radio"/> |
| Cough                                                                                 | <input type="radio"/>              | <input type="radio"/> | <input type="radio"/> | <input type="radio"/> | <input type="radio"/> | <input type="radio"/> |
| Coughing up blood                                                                     | <input type="radio"/>              | <input type="radio"/> | <input type="radio"/> | <input type="radio"/> | <input type="radio"/> | <input type="radio"/> |

|                                                                                             |                       |                       |                       |                       |                       |                       |
|---------------------------------------------------------------------------------------------|-----------------------|-----------------------|-----------------------|-----------------------|-----------------------|-----------------------|
| Covid toes (tender or itchy rash or chilblains on the toes or foot)                         | <input type="radio"/> | <input type="radio"/> | <input type="radio"/> | <input type="radio"/> | <input type="radio"/> | <input type="radio"/> |
| Cracked or dry lips                                                                         | <input type="radio"/> | <input type="radio"/> | <input type="radio"/> | <input type="radio"/> | <input type="radio"/> | <input type="radio"/> |
| Dental problems (i.e. chipped tooth, tooth loss)                                            | <input type="radio"/> | <input type="radio"/> | <input type="radio"/> | <input type="radio"/> | <input type="radio"/> | <input type="radio"/> |
| Diarrhea                                                                                    | <input type="radio"/> | <input type="radio"/> | <input type="radio"/> | <input type="radio"/> | <input type="radio"/> | <input type="radio"/> |
| Difficulty concentrating or focusing                                                        | <input type="radio"/> | <input type="radio"/> | <input type="radio"/> | <input type="radio"/> | <input type="radio"/> | <input type="radio"/> |
| Difficulty sleeping                                                                         | <input type="radio"/> | <input type="radio"/> | <input type="radio"/> | <input type="radio"/> | <input type="radio"/> | <input type="radio"/> |
| Difficulty speaking properly                                                                | <input type="radio"/> | <input type="radio"/> | <input type="radio"/> | <input type="radio"/> | <input type="radio"/> | <input type="radio"/> |
| Discoloration of the skin (for example: purple or blue on the hands or feet, no blistering) | <input type="radio"/> | <input type="radio"/> | <input type="radio"/> | <input type="radio"/> | <input type="radio"/> | <input type="radio"/> |
| Dizziness                                                                                   | <input type="radio"/> | <input type="radio"/> | <input type="radio"/> | <input type="radio"/> | <input type="radio"/> | <input type="radio"/> |
| Dry eyes                                                                                    | <input type="radio"/> | <input type="radio"/> | <input type="radio"/> | <input type="radio"/> | <input type="radio"/> | <input type="radio"/> |
| Dry or peeling skin                                                                         | <input type="radio"/> | <input type="radio"/> | <input type="radio"/> | <input type="radio"/> | <input type="radio"/> | <input type="radio"/> |
| Dry scalp or dandruff                                                                       | <input type="radio"/> | <input type="radio"/> | <input type="radio"/> | <input type="radio"/> | <input type="radio"/> | <input type="radio"/> |
| Dry throat                                                                                  | <input type="radio"/> | <input type="radio"/> | <input type="radio"/> | <input type="radio"/> | <input type="radio"/> | <input type="radio"/> |
| Ear pain/earache                                                                            | <input type="radio"/> | <input type="radio"/> | <input type="radio"/> | <input type="radio"/> | <input type="radio"/> | <input type="radio"/> |
| Elevated thyroid hormones                                                                   | <input type="radio"/> | <input type="radio"/> | <input type="radio"/> | <input type="radio"/> | <input type="radio"/> | <input type="radio"/> |
| Extreme pressure at base of head or occipital nerve                                         | <input type="radio"/> | <input type="radio"/> | <input type="radio"/> | <input type="radio"/> | <input type="radio"/> | <input type="radio"/> |
| Eye stye or infection                                                                       | <input type="radio"/> | <input type="radio"/> | <input type="radio"/> | <input type="radio"/> | <input type="radio"/> | <input type="radio"/> |
| Fatigue                                                                                     | <input type="radio"/> | <input type="radio"/> | <input type="radio"/> | <input type="radio"/> | <input type="radio"/> | <input type="radio"/> |
| Feeling irritable                                                                           | <input type="radio"/> | <input type="radio"/> | <input type="radio"/> | <input type="radio"/> | <input type="radio"/> | <input type="radio"/> |
| Feeling of burning skin                                                                     | <input type="radio"/> | <input type="radio"/> | <input type="radio"/> | <input type="radio"/> | <input type="radio"/> | <input type="radio"/> |
| Fever or chills                                                                             | <input type="radio"/> | <input type="radio"/> | <input type="radio"/> | <input type="radio"/> | <input type="radio"/> | <input type="radio"/> |
| Floaters or flashes of light in vision                                                      | <input type="radio"/> | <input type="radio"/> | <input type="radio"/> | <input type="radio"/> | <input type="radio"/> | <input type="radio"/> |
| Foot pain                                                                                   | <input type="radio"/> | <input type="radio"/> | <input type="radio"/> | <input type="radio"/> | <input type="radio"/> | <input type="radio"/> |
| GERD (acid reflux) with excessive salivation                                                | <input type="radio"/> | <input type="radio"/> | <input type="radio"/> | <input type="radio"/> | <input type="radio"/> | <input type="radio"/> |
| Goiter or lump in throat                                                                    | <input type="radio"/> | <input type="radio"/> | <input type="radio"/> | <input type="radio"/> | <input type="radio"/> | <input type="radio"/> |
| Hair loss                                                                                   | <input type="radio"/> | <input type="radio"/> | <input type="radio"/> | <input type="radio"/> | <input type="radio"/> | <input type="radio"/> |
| Hand or wrist pain                                                                          | <input type="radio"/> | <input type="radio"/> | <input type="radio"/> | <input type="radio"/> | <input type="radio"/> | <input type="radio"/> |
| Headache                                                                                    | <input type="radio"/> | <input type="radio"/> | <input type="radio"/> | <input type="radio"/> | <input type="radio"/> | <input type="radio"/> |
| Heart palpitations (heart skipping a beat or racing)                                        | <input type="radio"/> | <input type="radio"/> | <input type="radio"/> | <input type="radio"/> | <input type="radio"/> | <input type="radio"/> |
| Heat intolerance                                                                            | <input type="radio"/> | <input type="radio"/> | <input type="radio"/> | <input type="radio"/> | <input type="radio"/> | <input type="radio"/> |
| High blood pressure                                                                         | <input type="radio"/> | <input type="radio"/> | <input type="radio"/> | <input type="radio"/> | <input type="radio"/> | <input type="radio"/> |
| Hormone imbalances                                                                          | <input type="radio"/> | <input type="radio"/> | <input type="radio"/> | <input type="radio"/> | <input type="radio"/> | <input type="radio"/> |

|                                                             |                       |                       |                       |                       |                       |                       |
|-------------------------------------------------------------|-----------------------|-----------------------|-----------------------|-----------------------|-----------------------|-----------------------|
| "Hot" blood rush                                            | <input type="radio"/> | <input type="radio"/> | <input type="radio"/> | <input type="radio"/> | <input type="radio"/> | <input type="radio"/> |
| Inability to cry                                            | <input type="radio"/> | <input type="radio"/> | <input type="radio"/> | <input type="radio"/> | <input type="radio"/> | <input type="radio"/> |
| Inability to exercise or be active                          | <input type="radio"/> | <input type="radio"/> | <input type="radio"/> | <input type="radio"/> | <input type="radio"/> | <input type="radio"/> |
| Inability to yawn                                           | <input type="radio"/> | <input type="radio"/> | <input type="radio"/> | <input type="radio"/> | <input type="radio"/> | <input type="radio"/> |
| Internal tremors or buzzing/vibration                       | <input type="radio"/> | <input type="radio"/> | <input type="radio"/> | <input type="radio"/> | <input type="radio"/> | <input type="radio"/> |
| Irregular or skipped menstrual cycles                       | <input type="radio"/> | <input type="radio"/> | <input type="radio"/> | <input type="radio"/> | <input type="radio"/> | <input type="radio"/> |
| Jaw pain                                                    | <input type="radio"/> | <input type="radio"/> | <input type="radio"/> | <input type="radio"/> | <input type="radio"/> | <input type="radio"/> |
| Joint pain                                                  | <input type="radio"/> | <input type="radio"/> | <input type="radio"/> | <input type="radio"/> | <input type="radio"/> | <input type="radio"/> |
| Kidney issues or protein in urine                           | <input type="radio"/> | <input type="radio"/> | <input type="radio"/> | <input type="radio"/> | <input type="radio"/> | <input type="radio"/> |
| Kidney pain                                                 | <input type="radio"/> | <input type="radio"/> | <input type="radio"/> | <input type="radio"/> | <input type="radio"/> | <input type="radio"/> |
| Low blood oxygen                                            | <input type="radio"/> | <input type="radio"/> | <input type="radio"/> | <input type="radio"/> | <input type="radio"/> | <input type="radio"/> |
| Low blood pressure                                          | <input type="radio"/> | <input type="radio"/> | <input type="radio"/> | <input type="radio"/> | <input type="radio"/> | <input type="radio"/> |
| Lower back pain                                             | <input type="radio"/> | <input type="radio"/> | <input type="radio"/> | <input type="radio"/> | <input type="radio"/> | <input type="radio"/> |
| Loss of appetite                                            | <input type="radio"/> | <input type="radio"/> | <input type="radio"/> | <input type="radio"/> | <input type="radio"/> | <input type="radio"/> |
| Loss of hearing                                             | <input type="radio"/> | <input type="radio"/> | <input type="radio"/> | <input type="radio"/> | <input type="radio"/> | <input type="radio"/> |
| Loss or decrease in quality of vision                       | <input type="radio"/> | <input type="radio"/> | <input type="radio"/> | <input type="radio"/> | <input type="radio"/> | <input type="radio"/> |
| Lump in throat/difficulty swallowing                        | <input type="radio"/> | <input type="radio"/> | <input type="radio"/> | <input type="radio"/> | <input type="radio"/> | <input type="radio"/> |
| Memory problems                                             | <input type="radio"/> | <input type="radio"/> | <input type="radio"/> | <input type="radio"/> | <input type="radio"/> | <input type="radio"/> |
| Menstrual cycles that are heavier or lighter than normal    | <input type="radio"/> | <input type="radio"/> | <input type="radio"/> | <input type="radio"/> | <input type="radio"/> | <input type="radio"/> |
| Mid-back pain at base of ribs                               | <input type="radio"/> | <input type="radio"/> | <input type="radio"/> | <input type="radio"/> | <input type="radio"/> | <input type="radio"/> |
| Mouth sores or sore tongue                                  | <input type="radio"/> | <input type="radio"/> | <input type="radio"/> | <input type="radio"/> | <input type="radio"/> | <input type="radio"/> |
| Muscle or body aches                                        | <input type="radio"/> | <input type="radio"/> | <input type="radio"/> | <input type="radio"/> | <input type="radio"/> | <input type="radio"/> |
| Muscle twitching                                            | <input type="radio"/> | <input type="radio"/> | <input type="radio"/> | <input type="radio"/> | <input type="radio"/> | <input type="radio"/> |
| Nausea or vomiting                                          | <input type="radio"/> | <input type="radio"/> | <input type="radio"/> | <input type="radio"/> | <input type="radio"/> | <input type="radio"/> |
| Neck muscle pain                                            | <input type="radio"/> | <input type="radio"/> | <input type="radio"/> | <input type="radio"/> | <input type="radio"/> | <input type="radio"/> |
| Nerve pain                                                  | <input type="radio"/> | <input type="radio"/> | <input type="radio"/> | <input type="radio"/> | <input type="radio"/> | <input type="radio"/> |
| Nerve sensations (tingling, pins and needles, numbness)     | <input type="radio"/> | <input type="radio"/> | <input type="radio"/> | <input type="radio"/> | <input type="radio"/> | <input type="radio"/> |
| Neuropathy in feet and hands (weakness, numbness, and pain) | <input type="radio"/> | <input type="radio"/> | <input type="radio"/> | <input type="radio"/> | <input type="radio"/> | <input type="radio"/> |
| New allergies                                               | <input type="radio"/> | <input type="radio"/> | <input type="radio"/> | <input type="radio"/> | <input type="radio"/> | <input type="radio"/> |
| Night sweats                                                | <input type="radio"/> | <input type="radio"/> | <input type="radio"/> | <input type="radio"/> | <input type="radio"/> | <input type="radio"/> |
| Nightmares                                                  | <input type="radio"/> | <input type="radio"/> | <input type="radio"/> | <input type="radio"/> | <input type="radio"/> | <input type="radio"/> |
| Painful scalp                                               | <input type="radio"/> | <input type="radio"/> | <input type="radio"/> | <input type="radio"/> | <input type="radio"/> | <input type="radio"/> |
| Partial or complete loss of sense of smell                  | <input type="radio"/> | <input type="radio"/> | <input type="radio"/> | <input type="radio"/> | <input type="radio"/> | <input type="radio"/> |

|                                                                                 |                       |                       |                       |                       |                       |                       |
|---------------------------------------------------------------------------------|-----------------------|-----------------------|-----------------------|-----------------------|-----------------------|-----------------------|
| Partial or complete loss of sense of taste                                      | <input type="radio"/> | <input type="radio"/> | <input type="radio"/> | <input type="radio"/> | <input type="radio"/> | <input type="radio"/> |
| Persistent chest pain or pressure                                               | <input type="radio"/> | <input type="radio"/> | <input type="radio"/> | <input type="radio"/> | <input type="radio"/> | <input type="radio"/> |
| Personality change (drastic)                                                    | <input type="radio"/> | <input type="radio"/> | <input type="radio"/> | <input type="radio"/> | <input type="radio"/> | <input type="radio"/> |
| Petechiae (pinpoint rash)                                                       | <input type="radio"/> | <input type="radio"/> | <input type="radio"/> | <input type="radio"/> | <input type="radio"/> | <input type="radio"/> |
| Phantom smells                                                                  | <input type="radio"/> | <input type="radio"/> | <input type="radio"/> | <input type="radio"/> | <input type="radio"/> | <input type="radio"/> |
| Phlegm in back of throat                                                        | <input type="radio"/> | <input type="radio"/> | <input type="radio"/> | <input type="radio"/> | <input type="radio"/> | <input type="radio"/> |
| Post-exertional malaise (worsened symptoms or flu-like symptoms after exertion) | <input type="radio"/> | <input type="radio"/> | <input type="radio"/> | <input type="radio"/> | <input type="radio"/> | <input type="radio"/> |
| Postnasal drip                                                                  | <input type="radio"/> | <input type="radio"/> | <input type="radio"/> | <input type="radio"/> | <input type="radio"/> | <input type="radio"/> |
| Rash                                                                            | <input type="radio"/> | <input type="radio"/> | <input type="radio"/> | <input type="radio"/> | <input type="radio"/> | <input type="radio"/> |
| Reflux or heartburn                                                             | <input type="radio"/> | <input type="radio"/> | <input type="radio"/> | <input type="radio"/> | <input type="radio"/> | <input type="radio"/> |
| Runny nose                                                                      | <input type="radio"/> | <input type="radio"/> | <input type="radio"/> | <input type="radio"/> | <input type="radio"/> | <input type="radio"/> |
| Sadness                                                                         | <input type="radio"/> | <input type="radio"/> | <input type="radio"/> | <input type="radio"/> | <input type="radio"/> | <input type="radio"/> |
| Seizures                                                                        | <input type="radio"/> | <input type="radio"/> | <input type="radio"/> | <input type="radio"/> | <input type="radio"/> | <input type="radio"/> |
| Sharp or sudden chest pain                                                      | <input type="radio"/> | <input type="radio"/> | <input type="radio"/> | <input type="radio"/> | <input type="radio"/> | <input type="radio"/> |
| Shortness of breath or difficulty breathing                                     | <input type="radio"/> | <input type="radio"/> | <input type="radio"/> | <input type="radio"/> | <input type="radio"/> | <input type="radio"/> |
| Shortness of breath or exhaustion from bending over                             | <input type="radio"/> | <input type="radio"/> | <input type="radio"/> | <input type="radio"/> | <input type="radio"/> | <input type="radio"/> |
| Sleeping more than normal                                                       | <input type="radio"/> | <input type="radio"/> | <input type="radio"/> | <input type="radio"/> | <input type="radio"/> | <input type="radio"/> |
| Sore throat                                                                     | <input type="radio"/> | <input type="radio"/> | <input type="radio"/> | <input type="radio"/> | <input type="radio"/> | <input type="radio"/> |
| Spinal issues                                                                   | <input type="radio"/> | <input type="radio"/> | <input type="radio"/> | <input type="radio"/> | <input type="radio"/> | <input type="radio"/> |
| Spikes in blood pressure                                                        | <input type="radio"/> | <input type="radio"/> | <input type="radio"/> | <input type="radio"/> | <input type="radio"/> | <input type="radio"/> |
| Swollen hands or feet                                                           | <input type="radio"/> | <input type="radio"/> | <input type="radio"/> | <input type="radio"/> | <input type="radio"/> | <input type="radio"/> |
| Swollen lymph nodes                                                             | <input type="radio"/> | <input type="radio"/> | <input type="radio"/> | <input type="radio"/> | <input type="radio"/> | <input type="radio"/> |
| Syncope (fainting)                                                              | <input type="radio"/> | <input type="radio"/> | <input type="radio"/> | <input type="radio"/> | <input type="radio"/> | <input type="radio"/> |
| Tachycardia (rapid heartbeat) at rest                                           | <input type="radio"/> | <input type="radio"/> | <input type="radio"/> | <input type="radio"/> | <input type="radio"/> | <input type="radio"/> |
| Tachycardia (rapid heartbeat) after standing up                                 | <input type="radio"/> | <input type="radio"/> | <input type="radio"/> | <input type="radio"/> | <input type="radio"/> | <input type="radio"/> |
| Thrush (white fungal infection in the mouth or throat)                          | <input type="radio"/> | <input type="radio"/> | <input type="radio"/> | <input type="radio"/> | <input type="radio"/> | <input type="radio"/> |
| Tinnitus or humming in ears                                                     | <input type="radio"/> | <input type="radio"/> | <input type="radio"/> | <input type="radio"/> | <input type="radio"/> | <input type="radio"/> |
| Tremors or shakiness                                                            | <input type="radio"/> | <input type="radio"/> | <input type="radio"/> | <input type="radio"/> | <input type="radio"/> | <input type="radio"/> |
| Upper back pain                                                                 | <input type="radio"/> | <input type="radio"/> | <input type="radio"/> | <input type="radio"/> | <input type="radio"/> | <input type="radio"/> |
| UTI (urinary tract infection)                                                   | <input type="radio"/> | <input type="radio"/> | <input type="radio"/> | <input type="radio"/> | <input type="radio"/> | <input type="radio"/> |
| Weakened neck                                                                   | <input type="radio"/> | <input type="radio"/> | <input type="radio"/> | <input type="radio"/> | <input type="radio"/> | <input type="radio"/> |
| Weight gain                                                                     | <input type="radio"/> | <input type="radio"/> | <input type="radio"/> | <input type="radio"/> | <input type="radio"/> | <input type="radio"/> |

The next set of questions will ask about the same symptoms. Please answer based on your experience during the past month. If you have not experienced any of the symptoms at all, please select "Not at all" from the choices.

**During the past month, while experiencing the symptom, how much did it bothered you in terms of discomfort or pain?**

**If you have not experienced the symptom during the past month, please choose "Not at all."**

|                                                                                       | Not at all            | A little bit          | Somewhat              | Quite a bit           | Very much             |
|---------------------------------------------------------------------------------------|-----------------------|-----------------------|-----------------------|-----------------------|-----------------------|
| Abdominal pain                                                                        | <input type="radio"/> | <input type="radio"/> | <input type="radio"/> | <input type="radio"/> | <input type="radio"/> |
| Abnormally low temperature                                                            | <input type="radio"/> | <input type="radio"/> | <input type="radio"/> | <input type="radio"/> | <input type="radio"/> |
| Acid reflux                                                                           | <input type="radio"/> | <input type="radio"/> | <input type="radio"/> | <input type="radio"/> | <input type="radio"/> |
| Afternoon or evening fevers/low-grade fevers                                          | <input type="radio"/> | <input type="radio"/> | <input type="radio"/> | <input type="radio"/> | <input type="radio"/> |
| Anemia (low number of red blood cells)                                                | <input type="radio"/> | <input type="radio"/> | <input type="radio"/> | <input type="radio"/> | <input type="radio"/> |
| Anxiety                                                                               | <input type="radio"/> | <input type="radio"/> | <input type="radio"/> | <input type="radio"/> | <input type="radio"/> |
| Arrhythmia (improper beating of the heart due to electrical impulse problems)         | <input type="radio"/> | <input type="radio"/> | <input type="radio"/> | <input type="radio"/> | <input type="radio"/> |
| Bilateral neck throbbing around lymph nodes                                           | <input type="radio"/> | <input type="radio"/> | <input type="radio"/> | <input type="radio"/> | <input type="radio"/> |
| Blurry vision                                                                         | <input type="radio"/> | <input type="radio"/> | <input type="radio"/> | <input type="radio"/> | <input type="radio"/> |
| Bone aches in extremities                                                             | <input type="radio"/> | <input type="radio"/> | <input type="radio"/> | <input type="radio"/> | <input type="radio"/> |
| Brain fog                                                                             | <input type="radio"/> | <input type="radio"/> | <input type="radio"/> | <input type="radio"/> | <input type="radio"/> |
| Brain pressure                                                                        | <input type="radio"/> | <input type="radio"/> | <input type="radio"/> | <input type="radio"/> | <input type="radio"/> |
| Bulging veins                                                                         | <input type="radio"/> | <input type="radio"/> | <input type="radio"/> | <input type="radio"/> | <input type="radio"/> |
| Burning sensations                                                                    | <input type="radio"/> | <input type="radio"/> | <input type="radio"/> | <input type="radio"/> | <input type="radio"/> |
| Bruising of skin                                                                      | <input type="radio"/> | <input type="radio"/> | <input type="radio"/> | <input type="radio"/> | <input type="radio"/> |
| Calf cramps                                                                           | <input type="radio"/> | <input type="radio"/> | <input type="radio"/> | <input type="radio"/> | <input type="radio"/> |
| Change in nails (i.e. white spots, brittleness, change in moons)                      | <input type="radio"/> | <input type="radio"/> | <input type="radio"/> | <input type="radio"/> | <input type="radio"/> |
| Changes in voice                                                                      | <input type="radio"/> | <input type="radio"/> | <input type="radio"/> | <input type="radio"/> | <input type="radio"/> |
| Changed sense of taste                                                                | <input type="radio"/> | <input type="radio"/> | <input type="radio"/> | <input type="radio"/> | <input type="radio"/> |
| Chills but no fever                                                                   | <input type="radio"/> | <input type="radio"/> | <input type="radio"/> | <input type="radio"/> | <input type="radio"/> |
| Clogged ears                                                                          | <input type="radio"/> | <input type="radio"/> | <input type="radio"/> | <input type="radio"/> | <input type="radio"/> |
| Cold burning feeling in lungs                                                         | <input type="radio"/> | <input type="radio"/> | <input type="radio"/> | <input type="radio"/> | <input type="radio"/> |
| Confusion                                                                             | <input type="radio"/> | <input type="radio"/> | <input type="radio"/> | <input type="radio"/> | <input type="radio"/> |
| Congested or runny nose                                                               | <input type="radio"/> | <input type="radio"/> | <input type="radio"/> | <input type="radio"/> | <input type="radio"/> |
| Constant thirst                                                                       | <input type="radio"/> | <input type="radio"/> | <input type="radio"/> | <input type="radio"/> | <input type="radio"/> |
| Costochondritis (inflammation of the cartilage that connects a rib to the breastbone) | <input type="radio"/> | <input type="radio"/> | <input type="radio"/> | <input type="radio"/> | <input type="radio"/> |
| Cough                                                                                 | <input type="radio"/> | <input type="radio"/> | <input type="radio"/> | <input type="radio"/> | <input type="radio"/> |

|                                                                                             |                       |                       |                       |                       |                       |
|---------------------------------------------------------------------------------------------|-----------------------|-----------------------|-----------------------|-----------------------|-----------------------|
| Coughing up blood                                                                           | <input type="radio"/> | <input type="radio"/> | <input type="radio"/> | <input type="radio"/> | <input type="radio"/> |
| Covid toes (tender or itchy rash or chilblains on the toes or foot)                         | <input type="radio"/> | <input type="radio"/> | <input type="radio"/> | <input type="radio"/> | <input type="radio"/> |
| Cracked or dry lips                                                                         | <input type="radio"/> | <input type="radio"/> | <input type="radio"/> | <input type="radio"/> | <input type="radio"/> |
| Dental problems (i.e. chipped tooth, tooth loss)                                            | <input type="radio"/> | <input type="radio"/> | <input type="radio"/> | <input type="radio"/> | <input type="radio"/> |
| Diarrhea                                                                                    | <input type="radio"/> | <input type="radio"/> | <input type="radio"/> | <input type="radio"/> | <input type="radio"/> |
| Difficulty concentrating or focusing                                                        | <input type="radio"/> | <input type="radio"/> | <input type="radio"/> | <input type="radio"/> | <input type="radio"/> |
| Difficulty sleeping                                                                         | <input type="radio"/> | <input type="radio"/> | <input type="radio"/> | <input type="radio"/> | <input type="radio"/> |
| Difficulty speaking properly                                                                | <input type="radio"/> | <input type="radio"/> | <input type="radio"/> | <input type="radio"/> | <input type="radio"/> |
| Discoloration of the skin (for example: purple or blue on the hands or feet, no blistering) | <input type="radio"/> | <input type="radio"/> | <input type="radio"/> | <input type="radio"/> | <input type="radio"/> |
| Dizziness                                                                                   | <input type="radio"/> | <input type="radio"/> | <input type="radio"/> | <input type="radio"/> | <input type="radio"/> |
| Dry eyes                                                                                    | <input type="radio"/> | <input type="radio"/> | <input type="radio"/> | <input type="radio"/> | <input type="radio"/> |
| Dry or peeling skin                                                                         | <input type="radio"/> | <input type="radio"/> | <input type="radio"/> | <input type="radio"/> | <input type="radio"/> |
| Dry scalp or dandruff                                                                       | <input type="radio"/> | <input type="radio"/> | <input type="radio"/> | <input type="radio"/> | <input type="radio"/> |
| Dry throat                                                                                  | <input type="radio"/> | <input type="radio"/> | <input type="radio"/> | <input type="radio"/> | <input type="radio"/> |
| Ear pain/earache                                                                            | <input type="radio"/> | <input type="radio"/> | <input type="radio"/> | <input type="radio"/> | <input type="radio"/> |
| Elevated thyroid hormones                                                                   | <input type="radio"/> | <input type="radio"/> | <input type="radio"/> | <input type="radio"/> | <input type="radio"/> |
| Extreme pressure at base of head or occipital nerve                                         | <input type="radio"/> | <input type="radio"/> | <input type="radio"/> | <input type="radio"/> | <input type="radio"/> |
| Eye stye or infection                                                                       | <input type="radio"/> | <input type="radio"/> | <input type="radio"/> | <input type="radio"/> | <input type="radio"/> |
| Fatigue                                                                                     | <input type="radio"/> | <input type="radio"/> | <input type="radio"/> | <input type="radio"/> | <input type="radio"/> |
| Feeling irritable                                                                           | <input type="radio"/> | <input type="radio"/> | <input type="radio"/> | <input type="radio"/> | <input type="radio"/> |
| Feeling of burning skin                                                                     | <input type="radio"/> | <input type="radio"/> | <input type="radio"/> | <input type="radio"/> | <input type="radio"/> |
| Fever or chills                                                                             | <input type="radio"/> | <input type="radio"/> | <input type="radio"/> | <input type="radio"/> | <input type="radio"/> |
| Floaters or flashes of light in vision                                                      | <input type="radio"/> | <input type="radio"/> | <input type="radio"/> | <input type="radio"/> | <input type="radio"/> |
| Foot pain                                                                                   | <input type="radio"/> | <input type="radio"/> | <input type="radio"/> | <input type="radio"/> | <input type="radio"/> |
| GERD (acid reflux) with excessive salivation                                                | <input type="radio"/> | <input type="radio"/> | <input type="radio"/> | <input type="radio"/> | <input type="radio"/> |
| Goiter or lump in throat                                                                    | <input type="radio"/> | <input type="radio"/> | <input type="radio"/> | <input type="radio"/> | <input type="radio"/> |
| Hair loss                                                                                   | <input type="radio"/> | <input type="radio"/> | <input type="radio"/> | <input type="radio"/> | <input type="radio"/> |
| Hand or wrist pain                                                                          | <input type="radio"/> | <input type="radio"/> | <input type="radio"/> | <input type="radio"/> | <input type="radio"/> |
| Headache                                                                                    | <input type="radio"/> | <input type="radio"/> | <input type="radio"/> | <input type="radio"/> | <input type="radio"/> |
| Heart palpitations (heart skipping a beat or racing)                                        | <input type="radio"/> | <input type="radio"/> | <input type="radio"/> | <input type="radio"/> | <input type="radio"/> |
| Heat intolerance                                                                            | <input type="radio"/> | <input type="radio"/> | <input type="radio"/> | <input type="radio"/> | <input type="radio"/> |
| High blood pressure                                                                         | <input type="radio"/> | <input type="radio"/> | <input type="radio"/> | <input type="radio"/> | <input type="radio"/> |

|                                                             |                       |                       |                       |                       |                       |
|-------------------------------------------------------------|-----------------------|-----------------------|-----------------------|-----------------------|-----------------------|
| Hormone imbalances                                          | <input type="radio"/> | <input type="radio"/> | <input type="radio"/> | <input type="radio"/> | <input type="radio"/> |
| "Hot" blood rush                                            | <input type="radio"/> | <input type="radio"/> | <input type="radio"/> | <input type="radio"/> | <input type="radio"/> |
| Inability to cry                                            | <input type="radio"/> | <input type="radio"/> | <input type="radio"/> | <input type="radio"/> | <input type="radio"/> |
| Inability to exercise or be active                          | <input type="radio"/> | <input type="radio"/> | <input type="radio"/> | <input type="radio"/> | <input type="radio"/> |
| Inability to yawn                                           | <input type="radio"/> | <input type="radio"/> | <input type="radio"/> | <input type="radio"/> | <input type="radio"/> |
| Internal tremors or buzzing/vibration                       | <input type="radio"/> | <input type="radio"/> | <input type="radio"/> | <input type="radio"/> | <input type="radio"/> |
| Irregular or skipped menstrual cycles                       | <input type="radio"/> | <input type="radio"/> | <input type="radio"/> | <input type="radio"/> | <input type="radio"/> |
| Jaw pain                                                    | <input type="radio"/> | <input type="radio"/> | <input type="radio"/> | <input type="radio"/> | <input type="radio"/> |
| Joint pain                                                  | <input type="radio"/> | <input type="radio"/> | <input type="radio"/> | <input type="radio"/> | <input type="radio"/> |
| Kidney issues or protein in urine                           | <input type="radio"/> | <input type="radio"/> | <input type="radio"/> | <input type="radio"/> | <input type="radio"/> |
| Kidney pain                                                 | <input type="radio"/> | <input type="radio"/> | <input type="radio"/> | <input type="radio"/> | <input type="radio"/> |
| Low blood oxygen                                            | <input type="radio"/> | <input type="radio"/> | <input type="radio"/> | <input type="radio"/> | <input type="radio"/> |
| Low blood pressure                                          | <input type="radio"/> | <input type="radio"/> | <input type="radio"/> | <input type="radio"/> | <input type="radio"/> |
| Lower back pain                                             | <input type="radio"/> | <input type="radio"/> | <input type="radio"/> | <input type="radio"/> | <input type="radio"/> |
| Loss of appetite                                            | <input type="radio"/> | <input type="radio"/> | <input type="radio"/> | <input type="radio"/> | <input type="radio"/> |
| Loss of hearing                                             | <input type="radio"/> | <input type="radio"/> | <input type="radio"/> | <input type="radio"/> | <input type="radio"/> |
| Loss or decrease in quality of vision                       | <input type="radio"/> | <input type="radio"/> | <input type="radio"/> | <input type="radio"/> | <input type="radio"/> |
| Lump in throat/difficulty swallowing                        | <input type="radio"/> | <input type="radio"/> | <input type="radio"/> | <input type="radio"/> | <input type="radio"/> |
| Memory problems                                             | <input type="radio"/> | <input type="radio"/> | <input type="radio"/> | <input type="radio"/> | <input type="radio"/> |
| Menstrual cycles that are heavier or lighter than normal    | <input type="radio"/> | <input type="radio"/> | <input type="radio"/> | <input type="radio"/> | <input type="radio"/> |
| Mid-back pain at base of ribs                               | <input type="radio"/> | <input type="radio"/> | <input type="radio"/> | <input type="radio"/> | <input type="radio"/> |
| Mouth sores or sore tongue                                  | <input type="radio"/> | <input type="radio"/> | <input type="radio"/> | <input type="radio"/> | <input type="radio"/> |
| Muscle or body aches                                        | <input type="radio"/> | <input type="radio"/> | <input type="radio"/> | <input type="radio"/> | <input type="radio"/> |
| Muscle twitching                                            | <input type="radio"/> | <input type="radio"/> | <input type="radio"/> | <input type="radio"/> | <input type="radio"/> |
| Nausea or vomiting                                          | <input type="radio"/> | <input type="radio"/> | <input type="radio"/> | <input type="radio"/> | <input type="radio"/> |
| Neck muscle pain                                            | <input type="radio"/> | <input type="radio"/> | <input type="radio"/> | <input type="radio"/> | <input type="radio"/> |
| Nerve pain                                                  | <input type="radio"/> | <input type="radio"/> | <input type="radio"/> | <input type="radio"/> | <input type="radio"/> |
| Nerve sensations (tingling, pins and needles, numbness)     | <input type="radio"/> | <input type="radio"/> | <input type="radio"/> | <input type="radio"/> | <input type="radio"/> |
| Neuropathy in feet and hands (weakness, numbness, and pain) | <input type="radio"/> | <input type="radio"/> | <input type="radio"/> | <input type="radio"/> | <input type="radio"/> |
| New allergies                                               | <input type="radio"/> | <input type="radio"/> | <input type="radio"/> | <input type="radio"/> | <input type="radio"/> |
| Night sweats                                                | <input type="radio"/> | <input type="radio"/> | <input type="radio"/> | <input type="radio"/> | <input type="radio"/> |
| Nightmares                                                  | <input type="radio"/> | <input type="radio"/> | <input type="radio"/> | <input type="radio"/> | <input type="radio"/> |
| Painful scalp                                               | <input type="radio"/> | <input type="radio"/> | <input type="radio"/> | <input type="radio"/> | <input type="radio"/> |



|                                                                                 |                       |                       |                       |                       |                       |
|---------------------------------------------------------------------------------|-----------------------|-----------------------|-----------------------|-----------------------|-----------------------|
| Partial or complete loss of sense of smell                                      | <input type="radio"/> | <input type="radio"/> | <input type="radio"/> | <input type="radio"/> | <input type="radio"/> |
| Partial or complete loss of sense of taste                                      | <input type="radio"/> | <input type="radio"/> | <input type="radio"/> | <input type="radio"/> | <input type="radio"/> |
| Persistent chest pain or pressure                                               | <input type="radio"/> | <input type="radio"/> | <input type="radio"/> | <input type="radio"/> | <input type="radio"/> |
| Personality change (drastic)                                                    | <input type="radio"/> | <input type="radio"/> | <input type="radio"/> | <input type="radio"/> | <input type="radio"/> |
| Petechiae (pinpoint rash)                                                       | <input type="radio"/> | <input type="radio"/> | <input type="radio"/> | <input type="radio"/> | <input type="radio"/> |
| Phantom smells                                                                  | <input type="radio"/> | <input type="radio"/> | <input type="radio"/> | <input type="radio"/> | <input type="radio"/> |
| Phlegm in back of throat                                                        | <input type="radio"/> | <input type="radio"/> | <input type="radio"/> | <input type="radio"/> | <input type="radio"/> |
| Post-exertional malaise (worsened symptoms or flu-like symptoms after exertion) | <input type="radio"/> | <input type="radio"/> | <input type="radio"/> | <input type="radio"/> | <input type="radio"/> |
| Postnasal drip                                                                  | <input type="radio"/> | <input type="radio"/> | <input type="radio"/> | <input type="radio"/> | <input type="radio"/> |
| Rash                                                                            | <input type="radio"/> | <input type="radio"/> | <input type="radio"/> | <input type="radio"/> | <input type="radio"/> |
| Reflux or heartburn                                                             | <input type="radio"/> | <input type="radio"/> | <input type="radio"/> | <input type="radio"/> | <input type="radio"/> |
| Runny nose                                                                      | <input type="radio"/> | <input type="radio"/> | <input type="radio"/> | <input type="radio"/> | <input type="radio"/> |
| Sadness                                                                         | <input type="radio"/> | <input type="radio"/> | <input type="radio"/> | <input type="radio"/> | <input type="radio"/> |
| Seizures                                                                        | <input type="radio"/> | <input type="radio"/> | <input type="radio"/> | <input type="radio"/> | <input type="radio"/> |
| Sharp or sudden chest pain                                                      | <input type="radio"/> | <input type="radio"/> | <input type="radio"/> | <input type="radio"/> | <input type="radio"/> |
| Shortness of breath or difficulty breathing                                     | <input type="radio"/> | <input type="radio"/> | <input type="radio"/> | <input type="radio"/> | <input type="radio"/> |
| Shortness of breath or exhaustion from bending over                             | <input type="radio"/> | <input type="radio"/> | <input type="radio"/> | <input type="radio"/> | <input type="radio"/> |
| Sleeping more than normal                                                       | <input type="radio"/> | <input type="radio"/> | <input type="radio"/> | <input type="radio"/> | <input type="radio"/> |
| Sore throat                                                                     | <input type="radio"/> | <input type="radio"/> | <input type="radio"/> | <input type="radio"/> | <input type="radio"/> |
| Spinal issues                                                                   | <input type="radio"/> | <input type="radio"/> | <input type="radio"/> | <input type="radio"/> | <input type="radio"/> |
| Spikes in blood pressure                                                        | <input type="radio"/> | <input type="radio"/> | <input type="radio"/> | <input type="radio"/> | <input type="radio"/> |
| Swollen hands or feet                                                           | <input type="radio"/> | <input type="radio"/> | <input type="radio"/> | <input type="radio"/> | <input type="radio"/> |
| Swollen lymph nodes                                                             | <input type="radio"/> | <input type="radio"/> | <input type="radio"/> | <input type="radio"/> | <input type="radio"/> |
| Syncope (fainting)                                                              | <input type="radio"/> | <input type="radio"/> | <input type="radio"/> | <input type="radio"/> | <input type="radio"/> |
| Tachycardia (rapid heartbeat) at rest                                           | <input type="radio"/> | <input type="radio"/> | <input type="radio"/> | <input type="radio"/> | <input type="radio"/> |
| Tachycardia (rapid heartbeat) after standing up                                 | <input type="radio"/> | <input type="radio"/> | <input type="radio"/> | <input type="radio"/> | <input type="radio"/> |
| Thrush (white fungal infection in the mouth or throat)                          | <input type="radio"/> | <input type="radio"/> | <input type="radio"/> | <input type="radio"/> | <input type="radio"/> |
| Tinnitus or humming in ears                                                     | <input type="radio"/> | <input type="radio"/> | <input type="radio"/> | <input type="radio"/> | <input type="radio"/> |
| Tremors or shakiness                                                            | <input type="radio"/> | <input type="radio"/> | <input type="radio"/> | <input type="radio"/> | <input type="radio"/> |
| Upper back pain                                                                 | <input type="radio"/> | <input type="radio"/> | <input type="radio"/> | <input type="radio"/> | <input type="radio"/> |
| UTI (urinary tract infection)                                                   | <input type="radio"/> | <input type="radio"/> | <input type="radio"/> | <input type="radio"/> | <input type="radio"/> |
| Weakened neck                                                                   | <input type="radio"/> | <input type="radio"/> | <input type="radio"/> | <input type="radio"/> | <input type="radio"/> |

Weight gain

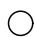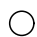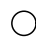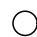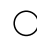

**During the past month, how much did the symptom impair your ability to work compared to pre-COVID?**

**If you have not experienced the symptom during the past month, please choose "Not at all."**

|                                                                                       | Not at all            | A little bit          | Somewhat              | Quite a bit           | Very much             |
|---------------------------------------------------------------------------------------|-----------------------|-----------------------|-----------------------|-----------------------|-----------------------|
| Abdominal pain                                                                        | <input type="radio"/> | <input type="radio"/> | <input type="radio"/> | <input type="radio"/> | <input type="radio"/> |
| Abnormally low temperature                                                            | <input type="radio"/> | <input type="radio"/> | <input type="radio"/> | <input type="radio"/> | <input type="radio"/> |
| Acid reflux                                                                           | <input type="radio"/> | <input type="radio"/> | <input type="radio"/> | <input type="radio"/> | <input type="radio"/> |
| Afternoon or evening fevers/low-grade fevers                                          | <input type="radio"/> | <input type="radio"/> | <input type="radio"/> | <input type="radio"/> | <input type="radio"/> |
| Anemia (low number of red blood cells)                                                | <input type="radio"/> | <input type="radio"/> | <input type="radio"/> | <input type="radio"/> | <input type="radio"/> |
| Anxiety                                                                               | <input type="radio"/> | <input type="radio"/> | <input type="radio"/> | <input type="radio"/> | <input type="radio"/> |
| Arrhythmia (improper beating of the heart due to electrical impulse problems)         | <input type="radio"/> | <input type="radio"/> | <input type="radio"/> | <input type="radio"/> | <input type="radio"/> |
| Bilateral neck throbbing around lymph nodes                                           | <input type="radio"/> | <input type="radio"/> | <input type="radio"/> | <input type="radio"/> | <input type="radio"/> |
| Blurry vision                                                                         | <input type="radio"/> | <input type="radio"/> | <input type="radio"/> | <input type="radio"/> | <input type="radio"/> |
| Bone aches in extremities                                                             | <input type="radio"/> | <input type="radio"/> | <input type="radio"/> | <input type="radio"/> | <input type="radio"/> |
| Brain fog                                                                             | <input type="radio"/> | <input type="radio"/> | <input type="radio"/> | <input type="radio"/> | <input type="radio"/> |
| Brain pressure                                                                        | <input type="radio"/> | <input type="radio"/> | <input type="radio"/> | <input type="radio"/> | <input type="radio"/> |
| Bulging veins                                                                         | <input type="radio"/> | <input type="radio"/> | <input type="radio"/> | <input type="radio"/> | <input type="radio"/> |
| Burning sensations                                                                    | <input type="radio"/> | <input type="radio"/> | <input type="radio"/> | <input type="radio"/> | <input type="radio"/> |
| Bruising of skin                                                                      | <input type="radio"/> | <input type="radio"/> | <input type="radio"/> | <input type="radio"/> | <input type="radio"/> |
| Calf cramps                                                                           | <input type="radio"/> | <input type="radio"/> | <input type="radio"/> | <input type="radio"/> | <input type="radio"/> |
| Change in nails (i.e. white spots, brittleness, change in moons)                      | <input type="radio"/> | <input type="radio"/> | <input type="radio"/> | <input type="radio"/> | <input type="radio"/> |
| Changes in voice                                                                      | <input type="radio"/> | <input type="radio"/> | <input type="radio"/> | <input type="radio"/> | <input type="radio"/> |
| Changed sense of taste                                                                | <input type="radio"/> | <input type="radio"/> | <input type="radio"/> | <input type="radio"/> | <input type="radio"/> |
| Chills but no fever                                                                   | <input type="radio"/> | <input type="radio"/> | <input type="radio"/> | <input type="radio"/> | <input type="radio"/> |
| Clogged ears                                                                          | <input type="radio"/> | <input type="radio"/> | <input type="radio"/> | <input type="radio"/> | <input type="radio"/> |
| Cold burning feeling in lungs                                                         | <input type="radio"/> | <input type="radio"/> | <input type="radio"/> | <input type="radio"/> | <input type="radio"/> |
| Confusion                                                                             | <input type="radio"/> | <input type="radio"/> | <input type="radio"/> | <input type="radio"/> | <input type="radio"/> |
| Congested or runny nose                                                               | <input type="radio"/> | <input type="radio"/> | <input type="radio"/> | <input type="radio"/> | <input type="radio"/> |
| Constant thirst                                                                       | <input type="radio"/> | <input type="radio"/> | <input type="radio"/> | <input type="radio"/> | <input type="radio"/> |
| Costochondritis (inflammation of the cartilage that connects a rib to the breastbone) | <input type="radio"/> | <input type="radio"/> | <input type="radio"/> | <input type="radio"/> | <input type="radio"/> |
| Cough                                                                                 | <input type="radio"/> | <input type="radio"/> | <input type="radio"/> | <input type="radio"/> | <input type="radio"/> |

|                                                                                             |                       |                       |                       |                       |                       |
|---------------------------------------------------------------------------------------------|-----------------------|-----------------------|-----------------------|-----------------------|-----------------------|
| Coughing up blood                                                                           | <input type="radio"/> | <input type="radio"/> | <input type="radio"/> | <input type="radio"/> | <input type="radio"/> |
| Covid toes (tender or itchy rash or chilblains on the toes or foot)                         | <input type="radio"/> | <input type="radio"/> | <input type="radio"/> | <input type="radio"/> | <input type="radio"/> |
| Cracked or dry lips                                                                         | <input type="radio"/> | <input type="radio"/> | <input type="radio"/> | <input type="radio"/> | <input type="radio"/> |
| Dental problems (i.e. chipped tooth, tooth loss)                                            | <input type="radio"/> | <input type="radio"/> | <input type="radio"/> | <input type="radio"/> | <input type="radio"/> |
| Diarrhea                                                                                    | <input type="radio"/> | <input type="radio"/> | <input type="radio"/> | <input type="radio"/> | <input type="radio"/> |
| Difficulty concentrating or focusing                                                        | <input type="radio"/> | <input type="radio"/> | <input type="radio"/> | <input type="radio"/> | <input type="radio"/> |
| Difficulty sleeping                                                                         | <input type="radio"/> | <input type="radio"/> | <input type="radio"/> | <input type="radio"/> | <input type="radio"/> |
| Difficulty speaking properly                                                                | <input type="radio"/> | <input type="radio"/> | <input type="radio"/> | <input type="radio"/> | <input type="radio"/> |
| Discoloration of the skin (for example: purple or blue on the hands or feet, no blistering) | <input type="radio"/> | <input type="radio"/> | <input type="radio"/> | <input type="radio"/> | <input type="radio"/> |
| Dizziness                                                                                   | <input type="radio"/> | <input type="radio"/> | <input type="radio"/> | <input type="radio"/> | <input type="radio"/> |
| Dry eyes                                                                                    | <input type="radio"/> | <input type="radio"/> | <input type="radio"/> | <input type="radio"/> | <input type="radio"/> |
| Dry or peeling skin                                                                         | <input type="radio"/> | <input type="radio"/> | <input type="radio"/> | <input type="radio"/> | <input type="radio"/> |
| Dry scalp or dandruff                                                                       | <input type="radio"/> | <input type="radio"/> | <input type="radio"/> | <input type="radio"/> | <input type="radio"/> |
| Dry throat                                                                                  | <input type="radio"/> | <input type="radio"/> | <input type="radio"/> | <input type="radio"/> | <input type="radio"/> |
| Ear pain/earache                                                                            | <input type="radio"/> | <input type="radio"/> | <input type="radio"/> | <input type="radio"/> | <input type="radio"/> |
| Elevated thyroid hormones                                                                   | <input type="radio"/> | <input type="radio"/> | <input type="radio"/> | <input type="radio"/> | <input type="radio"/> |
| Extreme pressure at base of head or occipital nerve                                         | <input type="radio"/> | <input type="radio"/> | <input type="radio"/> | <input type="radio"/> | <input type="radio"/> |
| Eye stye or infection                                                                       | <input type="radio"/> | <input type="radio"/> | <input type="radio"/> | <input type="radio"/> | <input type="radio"/> |
| Fatigue                                                                                     | <input type="radio"/> | <input type="radio"/> | <input type="radio"/> | <input type="radio"/> | <input type="radio"/> |
| Feeling irritable                                                                           | <input type="radio"/> | <input type="radio"/> | <input type="radio"/> | <input type="radio"/> | <input type="radio"/> |
| Feeling of burning skin                                                                     | <input type="radio"/> | <input type="radio"/> | <input type="radio"/> | <input type="radio"/> | <input type="radio"/> |
| Fever or chills                                                                             | <input type="radio"/> | <input type="radio"/> | <input type="radio"/> | <input type="radio"/> | <input type="radio"/> |
| Floaters or flashes of light in vision                                                      | <input type="radio"/> | <input type="radio"/> | <input type="radio"/> | <input type="radio"/> | <input type="radio"/> |
| Foot pain                                                                                   | <input type="radio"/> | <input type="radio"/> | <input type="radio"/> | <input type="radio"/> | <input type="radio"/> |
| GERD (acid reflux) with excessive salivation                                                | <input type="radio"/> | <input type="radio"/> | <input type="radio"/> | <input type="radio"/> | <input type="radio"/> |
| Goiter or lump in throat                                                                    | <input type="radio"/> | <input type="radio"/> | <input type="radio"/> | <input type="radio"/> | <input type="radio"/> |
| Hair loss                                                                                   | <input type="radio"/> | <input type="radio"/> | <input type="radio"/> | <input type="radio"/> | <input type="radio"/> |
| Hand or wrist pain                                                                          | <input type="radio"/> | <input type="radio"/> | <input type="radio"/> | <input type="radio"/> | <input type="radio"/> |
| Headache                                                                                    | <input type="radio"/> | <input type="radio"/> | <input type="radio"/> | <input type="radio"/> | <input type="radio"/> |
| Heart palpitations (heart skipping a beat or racing)                                        | <input type="radio"/> | <input type="radio"/> | <input type="radio"/> | <input type="radio"/> | <input type="radio"/> |
| Heat intolerance                                                                            | <input type="radio"/> | <input type="radio"/> | <input type="radio"/> | <input type="radio"/> | <input type="radio"/> |
| High blood pressure                                                                         | <input type="radio"/> | <input type="radio"/> | <input type="radio"/> | <input type="radio"/> | <input type="radio"/> |

|                                                             |                       |                       |                       |                       |                       |
|-------------------------------------------------------------|-----------------------|-----------------------|-----------------------|-----------------------|-----------------------|
| Hormone imbalances                                          | <input type="radio"/> | <input type="radio"/> | <input type="radio"/> | <input type="radio"/> | <input type="radio"/> |
| "Hot" blood rush                                            | <input type="radio"/> | <input type="radio"/> | <input type="radio"/> | <input type="radio"/> | <input type="radio"/> |
| Inability to cry                                            | <input type="radio"/> | <input type="radio"/> | <input type="radio"/> | <input type="radio"/> | <input type="radio"/> |
| Inability to exercise or be active                          | <input type="radio"/> | <input type="radio"/> | <input type="radio"/> | <input type="radio"/> | <input type="radio"/> |
| Inability to yawn                                           | <input type="radio"/> | <input type="radio"/> | <input type="radio"/> | <input type="radio"/> | <input type="radio"/> |
| Internal tremors or buzzing/vibration                       | <input type="radio"/> | <input type="radio"/> | <input type="radio"/> | <input type="radio"/> | <input type="radio"/> |
| Irregular or skipped menstrual cycles                       | <input type="radio"/> | <input type="radio"/> | <input type="radio"/> | <input type="radio"/> | <input type="radio"/> |
| Jaw pain                                                    | <input type="radio"/> | <input type="radio"/> | <input type="radio"/> | <input type="radio"/> | <input type="radio"/> |
| Joint pain                                                  | <input type="radio"/> | <input type="radio"/> | <input type="radio"/> | <input type="radio"/> | <input type="radio"/> |
| Kidney issues or protein in urine                           | <input type="radio"/> | <input type="radio"/> | <input type="radio"/> | <input type="radio"/> | <input type="radio"/> |
| Kidney pain                                                 | <input type="radio"/> | <input type="radio"/> | <input type="radio"/> | <input type="radio"/> | <input type="radio"/> |
| Low blood oxygen                                            | <input type="radio"/> | <input type="radio"/> | <input type="radio"/> | <input type="radio"/> | <input type="radio"/> |
| Low blood pressure                                          | <input type="radio"/> | <input type="radio"/> | <input type="radio"/> | <input type="radio"/> | <input type="radio"/> |
| Lower back pain                                             | <input type="radio"/> | <input type="radio"/> | <input type="radio"/> | <input type="radio"/> | <input type="radio"/> |
| Loss of appetite                                            | <input type="radio"/> | <input type="radio"/> | <input type="radio"/> | <input type="radio"/> | <input type="radio"/> |
| Loss of hearing                                             | <input type="radio"/> | <input type="radio"/> | <input type="radio"/> | <input type="radio"/> | <input type="radio"/> |
| Loss or decrease in quality of vision                       | <input type="radio"/> | <input type="radio"/> | <input type="radio"/> | <input type="radio"/> | <input type="radio"/> |
| Lump in throat/difficulty swallowing                        | <input type="radio"/> | <input type="radio"/> | <input type="radio"/> | <input type="radio"/> | <input type="radio"/> |
| Memory problems                                             | <input type="radio"/> | <input type="radio"/> | <input type="radio"/> | <input type="radio"/> | <input type="radio"/> |
| Menstrual cycles that are heavier or lighter than normal    | <input type="radio"/> | <input type="radio"/> | <input type="radio"/> | <input type="radio"/> | <input type="radio"/> |
| Mid-back pain at base of ribs                               | <input type="radio"/> | <input type="radio"/> | <input type="radio"/> | <input type="radio"/> | <input type="radio"/> |
| Mouth sores or sore tongue                                  | <input type="radio"/> | <input type="radio"/> | <input type="radio"/> | <input type="radio"/> | <input type="radio"/> |
| Muscle or body aches                                        | <input type="radio"/> | <input type="radio"/> | <input type="radio"/> | <input type="radio"/> | <input type="radio"/> |
| Muscle twitching                                            | <input type="radio"/> | <input type="radio"/> | <input type="radio"/> | <input type="radio"/> | <input type="radio"/> |
| Nausea or vomiting                                          | <input type="radio"/> | <input type="radio"/> | <input type="radio"/> | <input type="radio"/> | <input type="radio"/> |
| Neck muscle pain                                            | <input type="radio"/> | <input type="radio"/> | <input type="radio"/> | <input type="radio"/> | <input type="radio"/> |
| Nerve pain                                                  | <input type="radio"/> | <input type="radio"/> | <input type="radio"/> | <input type="radio"/> | <input type="radio"/> |
| Nerve sensations (tingling, pins and needles, numbness)     | <input type="radio"/> | <input type="radio"/> | <input type="radio"/> | <input type="radio"/> | <input type="radio"/> |
| Neuropathy in feet and hands (weakness, numbness, and pain) | <input type="radio"/> | <input type="radio"/> | <input type="radio"/> | <input type="radio"/> | <input type="radio"/> |
| New allergies                                               | <input type="radio"/> | <input type="radio"/> | <input type="radio"/> | <input type="radio"/> | <input type="radio"/> |
| Night sweats                                                | <input type="radio"/> | <input type="radio"/> | <input type="radio"/> | <input type="radio"/> | <input type="radio"/> |
| Nightmares                                                  | <input type="radio"/> | <input type="radio"/> | <input type="radio"/> | <input type="radio"/> | <input type="radio"/> |
| Painful scalp                                               | <input type="radio"/> | <input type="radio"/> | <input type="radio"/> | <input type="radio"/> | <input type="radio"/> |

|                                                                                 |                       |                       |                       |                       |                       |
|---------------------------------------------------------------------------------|-----------------------|-----------------------|-----------------------|-----------------------|-----------------------|
| Partial or complete loss of sense of smell                                      | <input type="radio"/> | <input type="radio"/> | <input type="radio"/> | <input type="radio"/> | <input type="radio"/> |
| Partial or complete loss of sense of taste                                      | <input type="radio"/> | <input type="radio"/> | <input type="radio"/> | <input type="radio"/> | <input type="radio"/> |
| Persistent chest pain or pressure                                               | <input type="radio"/> | <input type="radio"/> | <input type="radio"/> | <input type="radio"/> | <input type="radio"/> |
| Personality change (drastic)                                                    | <input type="radio"/> | <input type="radio"/> | <input type="radio"/> | <input type="radio"/> | <input type="radio"/> |
| Petechiae (pinpoint rash)                                                       | <input type="radio"/> | <input type="radio"/> | <input type="radio"/> | <input type="radio"/> | <input type="radio"/> |
| Phantom smells                                                                  | <input type="radio"/> | <input type="radio"/> | <input type="radio"/> | <input type="radio"/> | <input type="radio"/> |
| Phlegm in back of throat                                                        | <input type="radio"/> | <input type="radio"/> | <input type="radio"/> | <input type="radio"/> | <input type="radio"/> |
| Post-exertional malaise (worsened symptoms or flu-like symptoms after exertion) | <input type="radio"/> | <input type="radio"/> | <input type="radio"/> | <input type="radio"/> | <input type="radio"/> |
| Postnasal drip                                                                  | <input type="radio"/> | <input type="radio"/> | <input type="radio"/> | <input type="radio"/> | <input type="radio"/> |
| Rash                                                                            | <input type="radio"/> | <input type="radio"/> | <input type="radio"/> | <input type="radio"/> | <input type="radio"/> |
| Reflux or heartburn                                                             | <input type="radio"/> | <input type="radio"/> | <input type="radio"/> | <input type="radio"/> | <input type="radio"/> |
| Runny nose                                                                      | <input type="radio"/> | <input type="radio"/> | <input type="radio"/> | <input type="radio"/> | <input type="radio"/> |
| Sadness                                                                         | <input type="radio"/> | <input type="radio"/> | <input type="radio"/> | <input type="radio"/> | <input type="radio"/> |
| Seizures                                                                        | <input type="radio"/> | <input type="radio"/> | <input type="radio"/> | <input type="radio"/> | <input type="radio"/> |
| Sharp or sudden chest pain                                                      | <input type="radio"/> | <input type="radio"/> | <input type="radio"/> | <input type="radio"/> | <input type="radio"/> |
| Shortness of breath or difficulty breathing                                     | <input type="radio"/> | <input type="radio"/> | <input type="radio"/> | <input type="radio"/> | <input type="radio"/> |
| Shortness of breath or exhaustion from bending over                             | <input type="radio"/> | <input type="radio"/> | <input type="radio"/> | <input type="radio"/> | <input type="radio"/> |
| Sleeping more than normal                                                       | <input type="radio"/> | <input type="radio"/> | <input type="radio"/> | <input type="radio"/> | <input type="radio"/> |
| Sore throat                                                                     | <input type="radio"/> | <input type="radio"/> | <input type="radio"/> | <input type="radio"/> | <input type="radio"/> |
| Spinal issues                                                                   | <input type="radio"/> | <input type="radio"/> | <input type="radio"/> | <input type="radio"/> | <input type="radio"/> |
| Spikes in blood pressure                                                        | <input type="radio"/> | <input type="radio"/> | <input type="radio"/> | <input type="radio"/> | <input type="radio"/> |
| Swollen hands or feet                                                           | <input type="radio"/> | <input type="radio"/> | <input type="radio"/> | <input type="radio"/> | <input type="radio"/> |
| Swollen lymph nodes                                                             | <input type="radio"/> | <input type="radio"/> | <input type="radio"/> | <input type="radio"/> | <input type="radio"/> |
| Syncope (fainting)                                                              | <input type="radio"/> | <input type="radio"/> | <input type="radio"/> | <input type="radio"/> | <input type="radio"/> |
| Tachycardia (rapid heartbeat) at rest                                           | <input type="radio"/> | <input type="radio"/> | <input type="radio"/> | <input type="radio"/> | <input type="radio"/> |
| Tachycardia (rapid heartbeat) after standing up                                 | <input type="radio"/> | <input type="radio"/> | <input type="radio"/> | <input type="radio"/> | <input type="radio"/> |
| Thrush (white fungal infection in the mouth or throat)                          | <input type="radio"/> | <input type="radio"/> | <input type="radio"/> | <input type="radio"/> | <input type="radio"/> |
| Tinnitus or humming in ears                                                     | <input type="radio"/> | <input type="radio"/> | <input type="radio"/> | <input type="radio"/> | <input type="radio"/> |
| Tremors or shakiness                                                            | <input type="radio"/> | <input type="radio"/> | <input type="radio"/> | <input type="radio"/> | <input type="radio"/> |
| Upper back pain                                                                 | <input type="radio"/> | <input type="radio"/> | <input type="radio"/> | <input type="radio"/> | <input type="radio"/> |
| UTI (urinary tract infection)                                                   | <input type="radio"/> | <input type="radio"/> | <input type="radio"/> | <input type="radio"/> | <input type="radio"/> |
| Weakened neck                                                                   | <input type="radio"/> | <input type="radio"/> | <input type="radio"/> | <input type="radio"/> | <input type="radio"/> |

Weight gain



**During the past month, how much did the symptom impair your social or family functioning compared to pre-COVID?**

**If you have not experienced the symptom during the past month, please choose "Not at all."**

|                                                                                       | Not at all            | A little bit          | Somewhat              | Quite a bit           | Very much             |
|---------------------------------------------------------------------------------------|-----------------------|-----------------------|-----------------------|-----------------------|-----------------------|
| Abdominal pain                                                                        | <input type="radio"/> | <input type="radio"/> | <input type="radio"/> | <input type="radio"/> | <input type="radio"/> |
| Abnormally low temperature                                                            | <input type="radio"/> | <input type="radio"/> | <input type="radio"/> | <input type="radio"/> | <input type="radio"/> |
| Acid reflux                                                                           | <input type="radio"/> | <input type="radio"/> | <input type="radio"/> | <input type="radio"/> | <input type="radio"/> |
| Afternoon or evening fevers/low-grade fevers                                          | <input type="radio"/> | <input type="radio"/> | <input type="radio"/> | <input type="radio"/> | <input type="radio"/> |
| Anemia (low number of red blood cells)                                                | <input type="radio"/> | <input type="radio"/> | <input type="radio"/> | <input type="radio"/> | <input type="radio"/> |
| Anxiety                                                                               | <input type="radio"/> | <input type="radio"/> | <input type="radio"/> | <input type="radio"/> | <input type="radio"/> |
| Arrhythmia (improper beating of the heart due to electrical impulse problems)         | <input type="radio"/> | <input type="radio"/> | <input type="radio"/> | <input type="radio"/> | <input type="radio"/> |
| Bilateral neck throbbing around lymph nodes                                           | <input type="radio"/> | <input type="radio"/> | <input type="radio"/> | <input type="radio"/> | <input type="radio"/> |
| Blurry vision                                                                         | <input type="radio"/> | <input type="radio"/> | <input type="radio"/> | <input type="radio"/> | <input type="radio"/> |
| Bone aches in extremities                                                             | <input type="radio"/> | <input type="radio"/> | <input type="radio"/> | <input type="radio"/> | <input type="radio"/> |
| Brain fog                                                                             | <input type="radio"/> | <input type="radio"/> | <input type="radio"/> | <input type="radio"/> | <input type="radio"/> |
| Brain pressure                                                                        | <input type="radio"/> | <input type="radio"/> | <input type="radio"/> | <input type="radio"/> | <input type="radio"/> |
| Bulging veins                                                                         | <input type="radio"/> | <input type="radio"/> | <input type="radio"/> | <input type="radio"/> | <input type="radio"/> |
| Burning sensations                                                                    | <input type="radio"/> | <input type="radio"/> | <input type="radio"/> | <input type="radio"/> | <input type="radio"/> |
| Bruising of skin                                                                      | <input type="radio"/> | <input type="radio"/> | <input type="radio"/> | <input type="radio"/> | <input type="radio"/> |
| Calf cramps                                                                           | <input type="radio"/> | <input type="radio"/> | <input type="radio"/> | <input type="radio"/> | <input type="radio"/> |
| Change in nails (i.e. white spots, brittleness, change in moons)                      | <input type="radio"/> | <input type="radio"/> | <input type="radio"/> | <input type="radio"/> | <input type="radio"/> |
| Changes in voice                                                                      | <input type="radio"/> | <input type="radio"/> | <input type="radio"/> | <input type="radio"/> | <input type="radio"/> |
| Changed sense of taste                                                                | <input type="radio"/> | <input type="radio"/> | <input type="radio"/> | <input type="radio"/> | <input type="radio"/> |
| Chills but no fever                                                                   | <input type="radio"/> | <input type="radio"/> | <input type="radio"/> | <input type="radio"/> | <input type="radio"/> |
| Clogged ears                                                                          | <input type="radio"/> | <input type="radio"/> | <input type="radio"/> | <input type="radio"/> | <input type="radio"/> |
| Cold burning feeling in lungs                                                         | <input type="radio"/> | <input type="radio"/> | <input type="radio"/> | <input type="radio"/> | <input type="radio"/> |
| Confusion                                                                             | <input type="radio"/> | <input type="radio"/> | <input type="radio"/> | <input type="radio"/> | <input type="radio"/> |
| Congested or runny nose                                                               | <input type="radio"/> | <input type="radio"/> | <input type="radio"/> | <input type="radio"/> | <input type="radio"/> |
| Constant thirst                                                                       | <input type="radio"/> | <input type="radio"/> | <input type="radio"/> | <input type="radio"/> | <input type="radio"/> |
| Costochondritis (inflammation of the cartilage that connects a rib to the breastbone) | <input type="radio"/> | <input type="radio"/> | <input type="radio"/> | <input type="radio"/> | <input type="radio"/> |
| Cough                                                                                 | <input type="radio"/> | <input type="radio"/> | <input type="radio"/> | <input type="radio"/> | <input type="radio"/> |



|                                                                                             |                       |                       |                       |                       |                       |
|---------------------------------------------------------------------------------------------|-----------------------|-----------------------|-----------------------|-----------------------|-----------------------|
| Coughing up blood                                                                           | <input type="radio"/> | <input type="radio"/> | <input type="radio"/> | <input type="radio"/> | <input type="radio"/> |
| Covid toes (tender or itchy rash or chilblains on the toes or foot)                         | <input type="radio"/> | <input type="radio"/> | <input type="radio"/> | <input type="radio"/> | <input type="radio"/> |
| Cracked or dry lips                                                                         | <input type="radio"/> | <input type="radio"/> | <input type="radio"/> | <input type="radio"/> | <input type="radio"/> |
| Dental problems (i.e. chipped tooth, tooth loss)                                            | <input type="radio"/> | <input type="radio"/> | <input type="radio"/> | <input type="radio"/> | <input type="radio"/> |
| Diarrhea                                                                                    | <input type="radio"/> | <input type="radio"/> | <input type="radio"/> | <input type="radio"/> | <input type="radio"/> |
| Difficulty concentrating or focusing                                                        | <input type="radio"/> | <input type="radio"/> | <input type="radio"/> | <input type="radio"/> | <input type="radio"/> |
| Difficulty sleeping                                                                         | <input type="radio"/> | <input type="radio"/> | <input type="radio"/> | <input type="radio"/> | <input type="radio"/> |
| Difficulty speaking properly                                                                | <input type="radio"/> | <input type="radio"/> | <input type="radio"/> | <input type="radio"/> | <input type="radio"/> |
| Discoloration of the skin (for example: purple or blue on the hands or feet, no blistering) | <input type="radio"/> | <input type="radio"/> | <input type="radio"/> | <input type="radio"/> | <input type="radio"/> |
| Dizziness                                                                                   | <input type="radio"/> | <input type="radio"/> | <input type="radio"/> | <input type="radio"/> | <input type="radio"/> |
| Dry eyes                                                                                    | <input type="radio"/> | <input type="radio"/> | <input type="radio"/> | <input type="radio"/> | <input type="radio"/> |
| Dry or peeling skin                                                                         | <input type="radio"/> | <input type="radio"/> | <input type="radio"/> | <input type="radio"/> | <input type="radio"/> |
| Dry scalp or dandruff                                                                       | <input type="radio"/> | <input type="radio"/> | <input type="radio"/> | <input type="radio"/> | <input type="radio"/> |
| Dry throat                                                                                  | <input type="radio"/> | <input type="radio"/> | <input type="radio"/> | <input type="radio"/> | <input type="radio"/> |
| Ear pain/earache                                                                            | <input type="radio"/> | <input type="radio"/> | <input type="radio"/> | <input type="radio"/> | <input type="radio"/> |
| Elevated thyroid hormones                                                                   | <input type="radio"/> | <input type="radio"/> | <input type="radio"/> | <input type="radio"/> | <input type="radio"/> |
| Extreme pressure at base of head or occipital nerve                                         | <input type="radio"/> | <input type="radio"/> | <input type="radio"/> | <input type="radio"/> | <input type="radio"/> |
| Eye stye or infection                                                                       | <input type="radio"/> | <input type="radio"/> | <input type="radio"/> | <input type="radio"/> | <input type="radio"/> |
| Fatigue                                                                                     | <input type="radio"/> | <input type="radio"/> | <input type="radio"/> | <input type="radio"/> | <input type="radio"/> |
| Feeling irritable                                                                           | <input type="radio"/> | <input type="radio"/> | <input type="radio"/> | <input type="radio"/> | <input type="radio"/> |
| Feeling of burning skin                                                                     | <input type="radio"/> | <input type="radio"/> | <input type="radio"/> | <input type="radio"/> | <input type="radio"/> |
| Fever or chills                                                                             | <input type="radio"/> | <input type="radio"/> | <input type="radio"/> | <input type="radio"/> | <input type="radio"/> |
| Floaters or flashes of light in vision                                                      | <input type="radio"/> | <input type="radio"/> | <input type="radio"/> | <input type="radio"/> | <input type="radio"/> |
| Foot pain                                                                                   | <input type="radio"/> | <input type="radio"/> | <input type="radio"/> | <input type="radio"/> | <input type="radio"/> |
| GERD (acid reflux) with excessive salivation                                                | <input type="radio"/> | <input type="radio"/> | <input type="radio"/> | <input type="radio"/> | <input type="radio"/> |
| Goiter or lump in throat                                                                    | <input type="radio"/> | <input type="radio"/> | <input type="radio"/> | <input type="radio"/> | <input type="radio"/> |
| Hair loss                                                                                   | <input type="radio"/> | <input type="radio"/> | <input type="radio"/> | <input type="radio"/> | <input type="radio"/> |
| Hand or wrist pain                                                                          | <input type="radio"/> | <input type="radio"/> | <input type="radio"/> | <input type="radio"/> | <input type="radio"/> |
| Headache                                                                                    | <input type="radio"/> | <input type="radio"/> | <input type="radio"/> | <input type="radio"/> | <input type="radio"/> |
| Heart palpitations (heart skipping a beat or racing)                                        | <input type="radio"/> | <input type="radio"/> | <input type="radio"/> | <input type="radio"/> | <input type="radio"/> |
| Heat intolerance                                                                            | <input type="radio"/> | <input type="radio"/> | <input type="radio"/> | <input type="radio"/> | <input type="radio"/> |
| High blood pressure                                                                         | <input type="radio"/> | <input type="radio"/> | <input type="radio"/> | <input type="radio"/> | <input type="radio"/> |

|                                                             |                       |                       |                       |                       |                       |
|-------------------------------------------------------------|-----------------------|-----------------------|-----------------------|-----------------------|-----------------------|
| Hormone imbalances                                          | <input type="radio"/> | <input type="radio"/> | <input type="radio"/> | <input type="radio"/> | <input type="radio"/> |
| "Hot" blood rush                                            | <input type="radio"/> | <input type="radio"/> | <input type="radio"/> | <input type="radio"/> | <input type="radio"/> |
| Inability to cry                                            | <input type="radio"/> | <input type="radio"/> | <input type="radio"/> | <input type="radio"/> | <input type="radio"/> |
| Inability to exercise or be active                          | <input type="radio"/> | <input type="radio"/> | <input type="radio"/> | <input type="radio"/> | <input type="radio"/> |
| Inability to yawn                                           | <input type="radio"/> | <input type="radio"/> | <input type="radio"/> | <input type="radio"/> | <input type="radio"/> |
| Internal tremors or buzzing/vibration                       | <input type="radio"/> | <input type="radio"/> | <input type="radio"/> | <input type="radio"/> | <input type="radio"/> |
| Irregular or skipped menstrual cycles                       | <input type="radio"/> | <input type="radio"/> | <input type="radio"/> | <input type="radio"/> | <input type="radio"/> |
| Jaw pain                                                    | <input type="radio"/> | <input type="radio"/> | <input type="radio"/> | <input type="radio"/> | <input type="radio"/> |
| Joint pain                                                  | <input type="radio"/> | <input type="radio"/> | <input type="radio"/> | <input type="radio"/> | <input type="radio"/> |
| Kidney issues or protein in urine                           | <input type="radio"/> | <input type="radio"/> | <input type="radio"/> | <input type="radio"/> | <input type="radio"/> |
| Kidney pain                                                 | <input type="radio"/> | <input type="radio"/> | <input type="radio"/> | <input type="radio"/> | <input type="radio"/> |
| Low blood oxygen                                            | <input type="radio"/> | <input type="radio"/> | <input type="radio"/> | <input type="radio"/> | <input type="radio"/> |
| Low blood pressure                                          | <input type="radio"/> | <input type="radio"/> | <input type="radio"/> | <input type="radio"/> | <input type="radio"/> |
| Lower back pain                                             | <input type="radio"/> | <input type="radio"/> | <input type="radio"/> | <input type="radio"/> | <input type="radio"/> |
| Loss of appetite                                            | <input type="radio"/> | <input type="radio"/> | <input type="radio"/> | <input type="radio"/> | <input type="radio"/> |
| Loss of hearing                                             | <input type="radio"/> | <input type="radio"/> | <input type="radio"/> | <input type="radio"/> | <input type="radio"/> |
| Loss or decrease in quality of vision                       | <input type="radio"/> | <input type="radio"/> | <input type="radio"/> | <input type="radio"/> | <input type="radio"/> |
| Lump in throat/difficulty swallowing                        | <input type="radio"/> | <input type="radio"/> | <input type="radio"/> | <input type="radio"/> | <input type="radio"/> |
| Memory problems                                             | <input type="radio"/> | <input type="radio"/> | <input type="radio"/> | <input type="radio"/> | <input type="radio"/> |
| Menstrual cycles that are heavier or lighter than normal    | <input type="radio"/> | <input type="radio"/> | <input type="radio"/> | <input type="radio"/> | <input type="radio"/> |
| Mid-back pain at base of ribs                               | <input type="radio"/> | <input type="radio"/> | <input type="radio"/> | <input type="radio"/> | <input type="radio"/> |
| Mouth sores or sore tongue                                  | <input type="radio"/> | <input type="radio"/> | <input type="radio"/> | <input type="radio"/> | <input type="radio"/> |
| Muscle or body aches                                        | <input type="radio"/> | <input type="radio"/> | <input type="radio"/> | <input type="radio"/> | <input type="radio"/> |
| Muscle twitching                                            | <input type="radio"/> | <input type="radio"/> | <input type="radio"/> | <input type="radio"/> | <input type="radio"/> |
| Nausea or vomiting                                          | <input type="radio"/> | <input type="radio"/> | <input type="radio"/> | <input type="radio"/> | <input type="radio"/> |
| Neck muscle pain                                            | <input type="radio"/> | <input type="radio"/> | <input type="radio"/> | <input type="radio"/> | <input type="radio"/> |
| Nerve pain                                                  | <input type="radio"/> | <input type="radio"/> | <input type="radio"/> | <input type="radio"/> | <input type="radio"/> |
| Nerve sensations (tingling, pins and needles, numbness)     | <input type="radio"/> | <input type="radio"/> | <input type="radio"/> | <input type="radio"/> | <input type="radio"/> |
| Neuropathy in feet and hands (weakness, numbness, and pain) | <input type="radio"/> | <input type="radio"/> | <input type="radio"/> | <input type="radio"/> | <input type="radio"/> |
| New allergies                                               | <input type="radio"/> | <input type="radio"/> | <input type="radio"/> | <input type="radio"/> | <input type="radio"/> |
| Night sweats                                                | <input type="radio"/> | <input type="radio"/> | <input type="radio"/> | <input type="radio"/> | <input type="radio"/> |
| Nightmares                                                  | <input type="radio"/> | <input type="radio"/> | <input type="radio"/> | <input type="radio"/> | <input type="radio"/> |
| Painful scalp                                               | <input type="radio"/> | <input type="radio"/> | <input type="radio"/> | <input type="radio"/> | <input type="radio"/> |

|                                                                                 |                       |                       |                       |                       |                       |
|---------------------------------------------------------------------------------|-----------------------|-----------------------|-----------------------|-----------------------|-----------------------|
| Partial or complete loss of sense of smell                                      | <input type="radio"/> | <input type="radio"/> | <input type="radio"/> | <input type="radio"/> | <input type="radio"/> |
| Partial or complete loss of sense of taste                                      | <input type="radio"/> | <input type="radio"/> | <input type="radio"/> | <input type="radio"/> | <input type="radio"/> |
| Persistent chest pain or pressure                                               | <input type="radio"/> | <input type="radio"/> | <input type="radio"/> | <input type="radio"/> | <input type="radio"/> |
| Personality change (drastic)                                                    | <input type="radio"/> | <input type="radio"/> | <input type="radio"/> | <input type="radio"/> | <input type="radio"/> |
| Petechiae (pinpoint rash)                                                       | <input type="radio"/> | <input type="radio"/> | <input type="radio"/> | <input type="radio"/> | <input type="radio"/> |
| Phantom smells                                                                  | <input type="radio"/> | <input type="radio"/> | <input type="radio"/> | <input type="radio"/> | <input type="radio"/> |
| Phlegm in back of throat                                                        | <input type="radio"/> | <input type="radio"/> | <input type="radio"/> | <input type="radio"/> | <input type="radio"/> |
| Post-exertional malaise (worsened symptoms or flu-like symptoms after exertion) | <input type="radio"/> | <input type="radio"/> | <input type="radio"/> | <input type="radio"/> | <input type="radio"/> |
| Postnasal drip                                                                  | <input type="radio"/> | <input type="radio"/> | <input type="radio"/> | <input type="radio"/> | <input type="radio"/> |
| Rash                                                                            | <input type="radio"/> | <input type="radio"/> | <input type="radio"/> | <input type="radio"/> | <input type="radio"/> |
| Reflux or heartburn                                                             | <input type="radio"/> | <input type="radio"/> | <input type="radio"/> | <input type="radio"/> | <input type="radio"/> |
| Runny nose                                                                      | <input type="radio"/> | <input type="radio"/> | <input type="radio"/> | <input type="radio"/> | <input type="radio"/> |
| Sadness                                                                         | <input type="radio"/> | <input type="radio"/> | <input type="radio"/> | <input type="radio"/> | <input type="radio"/> |
| Seizures                                                                        | <input type="radio"/> | <input type="radio"/> | <input type="radio"/> | <input type="radio"/> | <input type="radio"/> |
| Sharp or sudden chest pain                                                      | <input type="radio"/> | <input type="radio"/> | <input type="radio"/> | <input type="radio"/> | <input type="radio"/> |
| Shortness of breath or difficulty breathing                                     | <input type="radio"/> | <input type="radio"/> | <input type="radio"/> | <input type="radio"/> | <input type="radio"/> |
| Shortness of breath or exhaustion from bending over                             | <input type="radio"/> | <input type="radio"/> | <input type="radio"/> | <input type="radio"/> | <input type="radio"/> |
| Sleeping more than normal                                                       | <input type="radio"/> | <input type="radio"/> | <input type="radio"/> | <input type="radio"/> | <input type="radio"/> |
| Sore throat                                                                     | <input type="radio"/> | <input type="radio"/> | <input type="radio"/> | <input type="radio"/> | <input type="radio"/> |
| Spinal issues                                                                   | <input type="radio"/> | <input type="radio"/> | <input type="radio"/> | <input type="radio"/> | <input type="radio"/> |
| Spikes in blood pressure                                                        | <input type="radio"/> | <input type="radio"/> | <input type="radio"/> | <input type="radio"/> | <input type="radio"/> |
| Swollen hands or feet                                                           | <input type="radio"/> | <input type="radio"/> | <input type="radio"/> | <input type="radio"/> | <input type="radio"/> |
| Swollen lymph nodes                                                             | <input type="radio"/> | <input type="radio"/> | <input type="radio"/> | <input type="radio"/> | <input type="radio"/> |
| Syncope (fainting)                                                              | <input type="radio"/> | <input type="radio"/> | <input type="radio"/> | <input type="radio"/> | <input type="radio"/> |
| Tachycardia (rapid heartbeat) at rest                                           | <input type="radio"/> | <input type="radio"/> | <input type="radio"/> | <input type="radio"/> | <input type="radio"/> |
| Tachycardia (rapid heartbeat) after standing up                                 | <input type="radio"/> | <input type="radio"/> | <input type="radio"/> | <input type="radio"/> | <input type="radio"/> |
| Thrush (white fungal infection in the mouth or throat)                          | <input type="radio"/> | <input type="radio"/> | <input type="radio"/> | <input type="radio"/> | <input type="radio"/> |
| Tinnitus or humming in ears                                                     | <input type="radio"/> | <input type="radio"/> | <input type="radio"/> | <input type="radio"/> | <input type="radio"/> |
| Tremors or shakiness                                                            | <input type="radio"/> | <input type="radio"/> | <input type="radio"/> | <input type="radio"/> | <input type="radio"/> |
| Upper back pain                                                                 | <input type="radio"/> | <input type="radio"/> | <input type="radio"/> | <input type="radio"/> | <input type="radio"/> |
| UTI (urinary tract infection)                                                   | <input type="radio"/> | <input type="radio"/> | <input type="radio"/> | <input type="radio"/> | <input type="radio"/> |
| Weakened neck                                                                   | <input type="radio"/> | <input type="radio"/> | <input type="radio"/> | <input type="radio"/> | <input type="radio"/> |

Weight gain

---

Are there any symptoms not listed above that you have experienced within the past month?

\*Please list all if so

---

---

Have you visited the hospital or been hospitalized in the past month for COVID-19 symptoms?

Yes \_\_\_\_\_  
 No \_\_\_\_\_

---

Please elaborate on your hospitalization (cause of hospitalization; relation, if any, to COVID-19; and health since hospitalization).

---

**During the past month**

|                                                   | 76-100% of health<br>before COVID-19 | 51-75% of health<br>before COVID-19 | 26-50% of health<br>before COVID-19 | 0-25% of health<br>before COVID-19 |
|---------------------------------------------------|--------------------------------------|-------------------------------------|-------------------------------------|------------------------------------|
| On your best days, would you say that you are at  | <input type="radio"/>                | <input type="radio"/>               | <input type="radio"/>               | <input type="radio"/>              |
| On your worst days, would you say that you are at | <input type="radio"/>                | <input type="radio"/>               | <input type="radio"/>               | <input type="radio"/>              |

Compared to your health before you received the first dose of your vaccine on [vaccine\_arm\_1][v\_v\_vax\_date], would you say that your health is currently

- Better  
 Worse  
 The same  
 Don't know

Please, in the space below, share any information about your experience with COVID-19 or the vaccine that we might have missed.

---

## Survey 4

Thank you for taking Survey 4, the final survey for the Yale COVID Recovery Study!

Please remember that you may stop this survey and come back to it at any point.

You may also find it helpful to have the below items ready as you complete the survey. If you do not have these items, please still fill in the information as best you can.

Testing results: dates, type (PCR, antigen) and result of tests. If you do not remember the exact date, the estimated date is enough. Symptom time and severity: your symptom log. You will be asked to pick symptoms you have had since you began having COVID-19 symptoms.

---

During the past 6 weeks, have you visited the hospital or been hospitalized for COVID-19 symptoms?

Yes \_\_\_\_\_  
 No

---

What were you hospitalized for?

\_\_\_\_\_

---

On your previous survey, you responded that you have experienced the following symptoms due to COVID-19 at some point in the past.

The following questions will ask about how these symptoms have changed, if at all. Please respond based on your experiences during the past 6 weeks.

**During the past 6 weeks, as compared to before, this symptom has been**

|                                                                                       | Better                | Worse                 | The same              |
|---------------------------------------------------------------------------------------|-----------------------|-----------------------|-----------------------|
| Abdominal pain                                                                        | <input type="radio"/> | <input type="radio"/> | <input type="radio"/> |
| Abnormally low temperature                                                            | <input type="radio"/> | <input type="radio"/> | <input type="radio"/> |
| Acid reflux                                                                           | <input type="radio"/> | <input type="radio"/> | <input type="radio"/> |
| Afternoon or evening fevers/low-grade fevers                                          | <input type="radio"/> | <input type="radio"/> | <input type="radio"/> |
| Anemia (low number of red blood cells)                                                | <input type="radio"/> | <input type="radio"/> | <input type="radio"/> |
| Anxiety                                                                               | <input type="radio"/> | <input type="radio"/> | <input type="radio"/> |
| Arrhythmia (improper beating of the heart due to electrical impulse problems)         | <input type="radio"/> | <input type="radio"/> | <input type="radio"/> |
| Bilateral neck throbbing around lymph nodes                                           | <input type="radio"/> | <input type="radio"/> | <input type="radio"/> |
| Blurry vision                                                                         | <input type="radio"/> | <input type="radio"/> | <input type="radio"/> |
| Bone aches in extremities                                                             | <input type="radio"/> | <input type="radio"/> | <input type="radio"/> |
| Brain fog                                                                             | <input type="radio"/> | <input type="radio"/> | <input type="radio"/> |
| Brain pressure                                                                        | <input type="radio"/> | <input type="radio"/> | <input type="radio"/> |
| Bulging veins                                                                         | <input type="radio"/> | <input type="radio"/> | <input type="radio"/> |
| Burning sensations                                                                    | <input type="radio"/> | <input type="radio"/> | <input type="radio"/> |
| Bruising of skin                                                                      | <input type="radio"/> | <input type="radio"/> | <input type="radio"/> |
| Calf cramps                                                                           | <input type="radio"/> | <input type="radio"/> | <input type="radio"/> |
| Change in nails (i.e. white spots, brittleness, change in moons)                      | <input type="radio"/> | <input type="radio"/> | <input type="radio"/> |
| Changes in voice                                                                      | <input type="radio"/> | <input type="radio"/> | <input type="radio"/> |
| Changed sense of taste                                                                | <input type="radio"/> | <input type="radio"/> | <input type="radio"/> |
| Chills but no fever                                                                   | <input type="radio"/> | <input type="radio"/> | <input type="radio"/> |
| Clogged ears                                                                          | <input type="radio"/> | <input type="radio"/> | <input type="radio"/> |
| Cold burning feeling in lungs                                                         | <input type="radio"/> | <input type="radio"/> | <input type="radio"/> |
| Confusion                                                                             | <input type="radio"/> | <input type="radio"/> | <input type="radio"/> |
| Congested or runny nose                                                               | <input type="radio"/> | <input type="radio"/> | <input type="radio"/> |
| Constant thirst                                                                       | <input type="radio"/> | <input type="radio"/> | <input type="radio"/> |
| Costochondritis (inflammation of the cartilage that connects a rib to the breastbone) | <input type="radio"/> | <input type="radio"/> | <input type="radio"/> |
| Cough                                                                                 | <input type="radio"/> | <input type="radio"/> | <input type="radio"/> |
| Coughing up blood                                                                     | <input type="radio"/> | <input type="radio"/> | <input type="radio"/> |
| Covid toes (tender or itchy rash or chilblains on the toes or foot)                   | <input type="radio"/> | <input type="radio"/> | <input type="radio"/> |

|                                                                                             |                       |                       |                       |
|---------------------------------------------------------------------------------------------|-----------------------|-----------------------|-----------------------|
| Cracked or dry lips                                                                         | <input type="radio"/> | <input type="radio"/> | <input type="radio"/> |
| Dental problems (i.e. chipped tooth, tooth loss)                                            | <input type="radio"/> | <input type="radio"/> | <input type="radio"/> |
| Diarrhea                                                                                    | <input type="radio"/> | <input type="radio"/> | <input type="radio"/> |
| Difficulty concentrating or focusing                                                        | <input type="radio"/> | <input type="radio"/> | <input type="radio"/> |
| Difficulty sleeping                                                                         | <input type="radio"/> | <input type="radio"/> | <input type="radio"/> |
| Difficulty speaking properly                                                                | <input type="radio"/> | <input type="radio"/> | <input type="radio"/> |
| Discoloration of the skin (for example: purple or blue on the hands or feet, no blistering) | <input type="radio"/> | <input type="radio"/> | <input type="radio"/> |
| Dizziness                                                                                   | <input type="radio"/> | <input type="radio"/> | <input type="radio"/> |
| Dry eyes                                                                                    | <input type="radio"/> | <input type="radio"/> | <input type="radio"/> |
| Dry or peeling skin                                                                         | <input type="radio"/> | <input type="radio"/> | <input type="radio"/> |
| Dry scalp or dandruff                                                                       | <input type="radio"/> | <input type="radio"/> | <input type="radio"/> |
| Dry throat                                                                                  | <input type="radio"/> | <input type="radio"/> | <input type="radio"/> |
| Ear pain/earache                                                                            | <input type="radio"/> | <input type="radio"/> | <input type="radio"/> |
| Elevated thyroid hormones                                                                   | <input type="radio"/> | <input type="radio"/> | <input type="radio"/> |
| Extreme pressure at base of head or occipital nerve                                         | <input type="radio"/> | <input type="radio"/> | <input type="radio"/> |
| Eye stye or infection                                                                       | <input type="radio"/> | <input type="radio"/> | <input type="radio"/> |
| Fatigue                                                                                     | <input type="radio"/> | <input type="radio"/> | <input type="radio"/> |
| Feeling irritable                                                                           | <input type="radio"/> | <input type="radio"/> | <input type="radio"/> |
| Feeling of burning skin                                                                     | <input type="radio"/> | <input type="radio"/> | <input type="radio"/> |
| Fever or chills                                                                             | <input type="radio"/> | <input type="radio"/> | <input type="radio"/> |
| Floaters or flashes of light in vision                                                      | <input type="radio"/> | <input type="radio"/> | <input type="radio"/> |
| Foot pain                                                                                   | <input type="radio"/> | <input type="radio"/> | <input type="radio"/> |
| GERD (acid reflux) with excessive salivation                                                | <input type="radio"/> | <input type="radio"/> | <input type="radio"/> |
| Goiter or lump in throat                                                                    | <input type="radio"/> | <input type="radio"/> | <input type="radio"/> |
| Hair loss                                                                                   | <input type="radio"/> | <input type="radio"/> | <input type="radio"/> |
| Hand or wrist pain                                                                          | <input type="radio"/> | <input type="radio"/> | <input type="radio"/> |
| Headache                                                                                    | <input type="radio"/> | <input type="radio"/> | <input type="radio"/> |
| Heart palpitations (heart skipping a beat or racing)                                        | <input type="radio"/> | <input type="radio"/> | <input type="radio"/> |
| Heat intolerance                                                                            | <input type="radio"/> | <input type="radio"/> | <input type="radio"/> |
| High blood pressure                                                                         | <input type="radio"/> | <input type="radio"/> | <input type="radio"/> |
| Hormone imbalances                                                                          | <input type="radio"/> | <input type="radio"/> | <input type="radio"/> |
| "Hot" blood rush                                                                            | <input type="radio"/> | <input type="radio"/> | <input type="radio"/> |
| Inability to cry                                                                            | <input type="radio"/> | <input type="radio"/> | <input type="radio"/> |



|                                                             |                       |                       |                       |
|-------------------------------------------------------------|-----------------------|-----------------------|-----------------------|
| Inability to exercise or be active                          | <input type="radio"/> | <input type="radio"/> | <input type="radio"/> |
| Inability to yawn                                           | <input type="radio"/> | <input type="radio"/> | <input type="radio"/> |
| Internal tremors or buzzing/vibration                       | <input type="radio"/> | <input type="radio"/> | <input type="radio"/> |
| Irregular or skipped menstrual cycles                       | <input type="radio"/> | <input type="radio"/> | <input type="radio"/> |
| Jaw pain                                                    | <input type="radio"/> | <input type="radio"/> | <input type="radio"/> |
| Joint pain                                                  | <input type="radio"/> | <input type="radio"/> | <input type="radio"/> |
| Kidney issues or protein in urine                           | <input type="radio"/> | <input type="radio"/> | <input type="radio"/> |
| Kidney pain                                                 | <input type="radio"/> | <input type="radio"/> | <input type="radio"/> |
| Low blood oxygen                                            | <input type="radio"/> | <input type="radio"/> | <input type="radio"/> |
| Low blood pressure                                          | <input type="radio"/> | <input type="radio"/> | <input type="radio"/> |
| Lower back pain                                             | <input type="radio"/> | <input type="radio"/> | <input type="radio"/> |
| Loss of appetite                                            | <input type="radio"/> | <input type="radio"/> | <input type="radio"/> |
| Loss of hearing                                             | <input type="radio"/> | <input type="radio"/> | <input type="radio"/> |
| Loss or decrease in quality of vision                       | <input type="radio"/> | <input type="radio"/> | <input type="radio"/> |
| Lump in throat/difficulty swallowing                        | <input type="radio"/> | <input type="radio"/> | <input type="radio"/> |
| Memory problems                                             | <input type="radio"/> | <input type="radio"/> | <input type="radio"/> |
| Menstrual cycles that are heavier or lighter than normal    | <input type="radio"/> | <input type="radio"/> | <input type="radio"/> |
| Mid-back pain at base of ribs                               | <input type="radio"/> | <input type="radio"/> | <input type="radio"/> |
| Mouth sores or sore tongue                                  | <input type="radio"/> | <input type="radio"/> | <input type="radio"/> |
| Muscle or body aches                                        | <input type="radio"/> | <input type="radio"/> | <input type="radio"/> |
| Muscle twitching                                            | <input type="radio"/> | <input type="radio"/> | <input type="radio"/> |
| Nausea or vomiting                                          | <input type="radio"/> | <input type="radio"/> | <input type="radio"/> |
| Neck muscle pain                                            | <input type="radio"/> | <input type="radio"/> | <input type="radio"/> |
| Nerve pain                                                  | <input type="radio"/> | <input type="radio"/> | <input type="radio"/> |
| Nerve sensations (tingling, pins and needles, numbness)     | <input type="radio"/> | <input type="radio"/> | <input type="radio"/> |
| Neuropathy in feet and hands (weakness, numbness, and pain) | <input type="radio"/> | <input type="radio"/> | <input type="radio"/> |
| New allergies                                               | <input type="radio"/> | <input type="radio"/> | <input type="radio"/> |
| Night sweats                                                | <input type="radio"/> | <input type="radio"/> | <input type="radio"/> |
| Nightmares                                                  | <input type="radio"/> | <input type="radio"/> | <input type="radio"/> |
| Painful scalp                                               | <input type="radio"/> | <input type="radio"/> | <input type="radio"/> |
| Partial or complete loss of sense of smell                  | <input type="radio"/> | <input type="radio"/> | <input type="radio"/> |
| Partial or complete loss of sense of taste                  | <input type="radio"/> | <input type="radio"/> | <input type="radio"/> |

|                                                                                       |                       |                       |                       |
|---------------------------------------------------------------------------------------|-----------------------|-----------------------|-----------------------|
| Persistent chest pain or pressure                                                     | <input type="radio"/> | <input type="radio"/> | <input type="radio"/> |
| Personality change (drastic)                                                          | <input type="radio"/> | <input type="radio"/> | <input type="radio"/> |
| Petechiae (pinpoint rash)                                                             | <input type="radio"/> | <input type="radio"/> | <input type="radio"/> |
| Phantom smells                                                                        | <input type="radio"/> | <input type="radio"/> | <input type="radio"/> |
| Phlegm in back of throat                                                              | <input type="radio"/> | <input type="radio"/> | <input type="radio"/> |
| Post-exertional malaise<br>(worsened symptoms or flu-like<br>symptoms after exertion) | <input type="radio"/> | <input type="radio"/> | <input type="radio"/> |
| Postnasal drip                                                                        | <input type="radio"/> | <input type="radio"/> | <input type="radio"/> |
| Rash                                                                                  | <input type="radio"/> | <input type="radio"/> | <input type="radio"/> |
| Reflux or heartburn                                                                   | <input type="radio"/> | <input type="radio"/> | <input type="radio"/> |
| Runny nose                                                                            | <input type="radio"/> | <input type="radio"/> | <input type="radio"/> |
| Sadness                                                                               | <input type="radio"/> | <input type="radio"/> | <input type="radio"/> |
| Seizures                                                                              | <input type="radio"/> | <input type="radio"/> | <input type="radio"/> |
| Sharp or sudden chest pain                                                            | <input type="radio"/> | <input type="radio"/> | <input type="radio"/> |
| Shortness of breath or difficulty<br>breathing                                        | <input type="radio"/> | <input type="radio"/> | <input type="radio"/> |
| Shortness of breath or<br>exhaustion from bending over                                | <input type="radio"/> | <input type="radio"/> | <input type="radio"/> |
| Sleeping more than normal                                                             | <input type="radio"/> | <input type="radio"/> | <input type="radio"/> |
| Sore throat                                                                           | <input type="radio"/> | <input type="radio"/> | <input type="radio"/> |
| Spinal issues                                                                         | <input type="radio"/> | <input type="radio"/> | <input type="radio"/> |
| Spikes in blood pressure                                                              | <input type="radio"/> | <input type="radio"/> | <input type="radio"/> |
| Swollen hands or feet                                                                 | <input type="radio"/> | <input type="radio"/> | <input type="radio"/> |
| Swollen lymph nodes                                                                   | <input type="radio"/> | <input type="radio"/> | <input type="radio"/> |
| Syncope (fainting)                                                                    | <input type="radio"/> | <input type="radio"/> | <input type="radio"/> |
| Tachycardia (rapid heartbeat) at<br>rest                                              | <input type="radio"/> | <input type="radio"/> | <input type="radio"/> |
| Tachycardia (rapid heartbeat)<br>after standing up                                    | <input type="radio"/> | <input type="radio"/> | <input type="radio"/> |
| Thrush (white fungal infection in<br>the mouth or throat)                             | <input type="radio"/> | <input type="radio"/> | <input type="radio"/> |
| Tinnitus or humming in ears                                                           | <input type="radio"/> | <input type="radio"/> | <input type="radio"/> |
| Tremors or shakiness                                                                  | <input type="radio"/> | <input type="radio"/> | <input type="radio"/> |
| Upper back pain                                                                       | <input type="radio"/> | <input type="radio"/> | <input type="radio"/> |
| UTI (urinary tract infection)                                                         | <input type="radio"/> | <input type="radio"/> | <input type="radio"/> |
| Weakened neck                                                                         | <input type="radio"/> | <input type="radio"/> | <input type="radio"/> |
| Weight gain                                                                           | <input type="radio"/> | <input type="radio"/> | <input type="radio"/> |

**During the past 6 weeks, I have experienced this symptom, on average**

|                                                                                       | Never--it has gone away completely | Once a month          | Once or twice a week  | 3 or 4 times a week   | Most days             | All the time          |
|---------------------------------------------------------------------------------------|------------------------------------|-----------------------|-----------------------|-----------------------|-----------------------|-----------------------|
| Abdominal pain                                                                        | <input type="radio"/>              | <input type="radio"/> | <input type="radio"/> | <input type="radio"/> | <input type="radio"/> | <input type="radio"/> |
| Abnormally low temperature                                                            | <input type="radio"/>              | <input type="radio"/> | <input type="radio"/> | <input type="radio"/> | <input type="radio"/> | <input type="radio"/> |
| Acid reflux                                                                           | <input type="radio"/>              | <input type="radio"/> | <input type="radio"/> | <input type="radio"/> | <input type="radio"/> | <input type="radio"/> |
| Afternoon or evening fevers/low-grade fevers                                          | <input type="radio"/>              | <input type="radio"/> | <input type="radio"/> | <input type="radio"/> | <input type="radio"/> | <input type="radio"/> |
| Anemia (low number of red blood cells)                                                | <input type="radio"/>              | <input type="radio"/> | <input type="radio"/> | <input type="radio"/> | <input type="radio"/> | <input type="radio"/> |
| Anxiety                                                                               | <input type="radio"/>              | <input type="radio"/> | <input type="radio"/> | <input type="radio"/> | <input type="radio"/> | <input type="radio"/> |
| Arrhythmia (improper beating of the heart due to electrical impulse problems)         | <input type="radio"/>              | <input type="radio"/> | <input type="radio"/> | <input type="radio"/> | <input type="radio"/> | <input type="radio"/> |
| Bilateral neck throbbing around lymph nodes                                           | <input type="radio"/>              | <input type="radio"/> | <input type="radio"/> | <input type="radio"/> | <input type="radio"/> | <input type="radio"/> |
| Blurry vision                                                                         | <input type="radio"/>              | <input type="radio"/> | <input type="radio"/> | <input type="radio"/> | <input type="radio"/> | <input type="radio"/> |
| Bone aches in extremities                                                             | <input type="radio"/>              | <input type="radio"/> | <input type="radio"/> | <input type="radio"/> | <input type="radio"/> | <input type="radio"/> |
| Brain fog                                                                             | <input type="radio"/>              | <input type="radio"/> | <input type="radio"/> | <input type="radio"/> | <input type="radio"/> | <input type="radio"/> |
| Brain pressure                                                                        | <input type="radio"/>              | <input type="radio"/> | <input type="radio"/> | <input type="radio"/> | <input type="radio"/> | <input type="radio"/> |
| Bulging veins                                                                         | <input type="radio"/>              | <input type="radio"/> | <input type="radio"/> | <input type="radio"/> | <input type="radio"/> | <input type="radio"/> |
| Burning sensations                                                                    | <input type="radio"/>              | <input type="radio"/> | <input type="radio"/> | <input type="radio"/> | <input type="radio"/> | <input type="radio"/> |
| Bruising of skin                                                                      | <input type="radio"/>              | <input type="radio"/> | <input type="radio"/> | <input type="radio"/> | <input type="radio"/> | <input type="radio"/> |
| Calf cramps                                                                           | <input type="radio"/>              | <input type="radio"/> | <input type="radio"/> | <input type="radio"/> | <input type="radio"/> | <input type="radio"/> |
| Change in nails (i.e. white spots, brittleness, change in moons)                      | <input type="radio"/>              | <input type="radio"/> | <input type="radio"/> | <input type="radio"/> | <input type="radio"/> | <input type="radio"/> |
| Changes in voice                                                                      | <input type="radio"/>              | <input type="radio"/> | <input type="radio"/> | <input type="radio"/> | <input type="radio"/> | <input type="radio"/> |
| Changed sense of taste                                                                | <input type="radio"/>              | <input type="radio"/> | <input type="radio"/> | <input type="radio"/> | <input type="radio"/> | <input type="radio"/> |
| Chills but no fever                                                                   | <input type="radio"/>              | <input type="radio"/> | <input type="radio"/> | <input type="radio"/> | <input type="radio"/> | <input type="radio"/> |
| Clogged ears                                                                          | <input type="radio"/>              | <input type="radio"/> | <input type="radio"/> | <input type="radio"/> | <input type="radio"/> | <input type="radio"/> |
| Cold burning feeling in lungs                                                         | <input type="radio"/>              | <input type="radio"/> | <input type="radio"/> | <input type="radio"/> | <input type="radio"/> | <input type="radio"/> |
| Confusion                                                                             | <input type="radio"/>              | <input type="radio"/> | <input type="radio"/> | <input type="radio"/> | <input type="radio"/> | <input type="radio"/> |
| Congested or runny nose                                                               | <input type="radio"/>              | <input type="radio"/> | <input type="radio"/> | <input type="radio"/> | <input type="radio"/> | <input type="radio"/> |
| Constant thirst                                                                       | <input type="radio"/>              | <input type="radio"/> | <input type="radio"/> | <input type="radio"/> | <input type="radio"/> | <input type="radio"/> |
| Costochondritis (inflammation of the cartilage that connects a rib to the breastbone) | <input type="radio"/>              | <input type="radio"/> | <input type="radio"/> | <input type="radio"/> | <input type="radio"/> | <input type="radio"/> |
| Cough                                                                                 | <input type="radio"/>              | <input type="radio"/> | <input type="radio"/> | <input type="radio"/> | <input type="radio"/> | <input type="radio"/> |
| Coughing up blood                                                                     | <input type="radio"/>              | <input type="radio"/> | <input type="radio"/> | <input type="radio"/> | <input type="radio"/> | <input type="radio"/> |

|                                                                                             |                       |                       |                       |                       |                       |                       |
|---------------------------------------------------------------------------------------------|-----------------------|-----------------------|-----------------------|-----------------------|-----------------------|-----------------------|
| Covid toes (tender or itchy rash or chilblains on the toes or foot)                         | <input type="radio"/> | <input type="radio"/> | <input type="radio"/> | <input type="radio"/> | <input type="radio"/> | <input type="radio"/> |
| Cracked or dry lips                                                                         | <input type="radio"/> | <input type="radio"/> | <input type="radio"/> | <input type="radio"/> | <input type="radio"/> | <input type="radio"/> |
| Dental problems (i.e. chipped tooth, tooth loss)                                            | <input type="radio"/> | <input type="radio"/> | <input type="radio"/> | <input type="radio"/> | <input type="radio"/> | <input type="radio"/> |
| Diarrhea                                                                                    | <input type="radio"/> | <input type="radio"/> | <input type="radio"/> | <input type="radio"/> | <input type="radio"/> | <input type="radio"/> |
| Difficulty concentrating or focusing                                                        | <input type="radio"/> | <input type="radio"/> | <input type="radio"/> | <input type="radio"/> | <input type="radio"/> | <input type="radio"/> |
| Difficulty sleeping                                                                         | <input type="radio"/> | <input type="radio"/> | <input type="radio"/> | <input type="radio"/> | <input type="radio"/> | <input type="radio"/> |
| Difficulty speaking properly                                                                | <input type="radio"/> | <input type="radio"/> | <input type="radio"/> | <input type="radio"/> | <input type="radio"/> | <input type="radio"/> |
| Discoloration of the skin (for example: purple or blue on the hands or feet, no blistering) | <input type="radio"/> | <input type="radio"/> | <input type="radio"/> | <input type="radio"/> | <input type="radio"/> | <input type="radio"/> |
| Dizziness                                                                                   | <input type="radio"/> | <input type="radio"/> | <input type="radio"/> | <input type="radio"/> | <input type="radio"/> | <input type="radio"/> |
| Dry eyes                                                                                    | <input type="radio"/> | <input type="radio"/> | <input type="radio"/> | <input type="radio"/> | <input type="radio"/> | <input type="radio"/> |
| Dry or peeling skin                                                                         | <input type="radio"/> | <input type="radio"/> | <input type="radio"/> | <input type="radio"/> | <input type="radio"/> | <input type="radio"/> |
| Dry scalp or dandruff                                                                       | <input type="radio"/> | <input type="radio"/> | <input type="radio"/> | <input type="radio"/> | <input type="radio"/> | <input type="radio"/> |
| Dry throat                                                                                  | <input type="radio"/> | <input type="radio"/> | <input type="radio"/> | <input type="radio"/> | <input type="radio"/> | <input type="radio"/> |
| Ear pain/earache                                                                            | <input type="radio"/> | <input type="radio"/> | <input type="radio"/> | <input type="radio"/> | <input type="radio"/> | <input type="radio"/> |
| Elevated thyroid hormones                                                                   | <input type="radio"/> | <input type="radio"/> | <input type="radio"/> | <input type="radio"/> | <input type="radio"/> | <input type="radio"/> |
| Extreme pressure at base of head or occipital nerve                                         | <input type="radio"/> | <input type="radio"/> | <input type="radio"/> | <input type="radio"/> | <input type="radio"/> | <input type="radio"/> |
| Eye stye or infection                                                                       | <input type="radio"/> | <input type="radio"/> | <input type="radio"/> | <input type="radio"/> | <input type="radio"/> | <input type="radio"/> |
| Fatigue                                                                                     | <input type="radio"/> | <input type="radio"/> | <input type="radio"/> | <input type="radio"/> | <input type="radio"/> | <input type="radio"/> |
| Feeling irritable                                                                           | <input type="radio"/> | <input type="radio"/> | <input type="radio"/> | <input type="radio"/> | <input type="radio"/> | <input type="radio"/> |
| Feeling of burning skin                                                                     | <input type="radio"/> | <input type="radio"/> | <input type="radio"/> | <input type="radio"/> | <input type="radio"/> | <input type="radio"/> |
| Fever or chills                                                                             | <input type="radio"/> | <input type="radio"/> | <input type="radio"/> | <input type="radio"/> | <input type="radio"/> | <input type="radio"/> |
| Floaters or flashes of light in vision                                                      | <input type="radio"/> | <input type="radio"/> | <input type="radio"/> | <input type="radio"/> | <input type="radio"/> | <input type="radio"/> |
| Foot pain                                                                                   | <input type="radio"/> | <input type="radio"/> | <input type="radio"/> | <input type="radio"/> | <input type="radio"/> | <input type="radio"/> |
| GERD (acid reflux) with excessive salivation                                                | <input type="radio"/> | <input type="radio"/> | <input type="radio"/> | <input type="radio"/> | <input type="radio"/> | <input type="radio"/> |
| Goiter or lump in throat                                                                    | <input type="radio"/> | <input type="radio"/> | <input type="radio"/> | <input type="radio"/> | <input type="radio"/> | <input type="radio"/> |
| Hair loss                                                                                   | <input type="radio"/> | <input type="radio"/> | <input type="radio"/> | <input type="radio"/> | <input type="radio"/> | <input type="radio"/> |
| Hand or wrist pain                                                                          | <input type="radio"/> | <input type="radio"/> | <input type="radio"/> | <input type="radio"/> | <input type="radio"/> | <input type="radio"/> |
| Headache                                                                                    | <input type="radio"/> | <input type="radio"/> | <input type="radio"/> | <input type="radio"/> | <input type="radio"/> | <input type="radio"/> |
| Heart palpitations (heart skipping a beat or racing)                                        | <input type="radio"/> | <input type="radio"/> | <input type="radio"/> | <input type="radio"/> | <input type="radio"/> | <input type="radio"/> |
| Heat intolerance                                                                            | <input type="radio"/> | <input type="radio"/> | <input type="radio"/> | <input type="radio"/> | <input type="radio"/> | <input type="radio"/> |
| High blood pressure                                                                         | <input type="radio"/> | <input type="radio"/> | <input type="radio"/> | <input type="radio"/> | <input type="radio"/> | <input type="radio"/> |
| Hormone imbalances                                                                          | <input type="radio"/> | <input type="radio"/> | <input type="radio"/> | <input type="radio"/> | <input type="radio"/> | <input type="radio"/> |

|                                                             |                       |                       |                       |                       |                       |                       |
|-------------------------------------------------------------|-----------------------|-----------------------|-----------------------|-----------------------|-----------------------|-----------------------|
| "Hot" blood rush                                            | <input type="radio"/> | <input type="radio"/> | <input type="radio"/> | <input type="radio"/> | <input type="radio"/> | <input type="radio"/> |
| Inability to cry                                            | <input type="radio"/> | <input type="radio"/> | <input type="radio"/> | <input type="radio"/> | <input type="radio"/> | <input type="radio"/> |
| Inability to exercise or be active                          | <input type="radio"/> | <input type="radio"/> | <input type="radio"/> | <input type="radio"/> | <input type="radio"/> | <input type="radio"/> |
| Inability to yawn                                           | <input type="radio"/> | <input type="radio"/> | <input type="radio"/> | <input type="radio"/> | <input type="radio"/> | <input type="radio"/> |
| Internal tremors or buzzing/vibration                       | <input type="radio"/> | <input type="radio"/> | <input type="radio"/> | <input type="radio"/> | <input type="radio"/> | <input type="radio"/> |
| Irregular or skipped menstrual cycles                       | <input type="radio"/> | <input type="radio"/> | <input type="radio"/> | <input type="radio"/> | <input type="radio"/> | <input type="radio"/> |
| Jaw pain                                                    | <input type="radio"/> | <input type="radio"/> | <input type="radio"/> | <input type="radio"/> | <input type="radio"/> | <input type="radio"/> |
| Joint pain                                                  | <input type="radio"/> | <input type="radio"/> | <input type="radio"/> | <input type="radio"/> | <input type="radio"/> | <input type="radio"/> |
| Kidney issues or protein in urine                           | <input type="radio"/> | <input type="radio"/> | <input type="radio"/> | <input type="radio"/> | <input type="radio"/> | <input type="radio"/> |
| Kidney pain                                                 | <input type="radio"/> | <input type="radio"/> | <input type="radio"/> | <input type="radio"/> | <input type="radio"/> | <input type="radio"/> |
| Low blood oxygen                                            | <input type="radio"/> | <input type="radio"/> | <input type="radio"/> | <input type="radio"/> | <input type="radio"/> | <input type="radio"/> |
| Low blood pressure                                          | <input type="radio"/> | <input type="radio"/> | <input type="radio"/> | <input type="radio"/> | <input type="radio"/> | <input type="radio"/> |
| Lower back pain                                             | <input type="radio"/> | <input type="radio"/> | <input type="radio"/> | <input type="radio"/> | <input type="radio"/> | <input type="radio"/> |
| Loss of appetite                                            | <input type="radio"/> | <input type="radio"/> | <input type="radio"/> | <input type="radio"/> | <input type="radio"/> | <input type="radio"/> |
| Loss of hearing                                             | <input type="radio"/> | <input type="radio"/> | <input type="radio"/> | <input type="radio"/> | <input type="radio"/> | <input type="radio"/> |
| Loss or decrease in quality of vision                       | <input type="radio"/> | <input type="radio"/> | <input type="radio"/> | <input type="radio"/> | <input type="radio"/> | <input type="radio"/> |
| Lump in throat/difficulty swallowing                        | <input type="radio"/> | <input type="radio"/> | <input type="radio"/> | <input type="radio"/> | <input type="radio"/> | <input type="radio"/> |
| Memory problems                                             | <input type="radio"/> | <input type="radio"/> | <input type="radio"/> | <input type="radio"/> | <input type="radio"/> | <input type="radio"/> |
| Menstrual cycles that are heavier or lighter than normal    | <input type="radio"/> | <input type="radio"/> | <input type="radio"/> | <input type="radio"/> | <input type="radio"/> | <input type="radio"/> |
| Mid-back pain at base of ribs                               | <input type="radio"/> | <input type="radio"/> | <input type="radio"/> | <input type="radio"/> | <input type="radio"/> | <input type="radio"/> |
| Mouth sores or sore tongue                                  | <input type="radio"/> | <input type="radio"/> | <input type="radio"/> | <input type="radio"/> | <input type="radio"/> | <input type="radio"/> |
| Muscle or body aches                                        | <input type="radio"/> | <input type="radio"/> | <input type="radio"/> | <input type="radio"/> | <input type="radio"/> | <input type="radio"/> |
| Muscle twitching                                            | <input type="radio"/> | <input type="radio"/> | <input type="radio"/> | <input type="radio"/> | <input type="radio"/> | <input type="radio"/> |
| Nausea or vomiting                                          | <input type="radio"/> | <input type="radio"/> | <input type="radio"/> | <input type="radio"/> | <input type="radio"/> | <input type="radio"/> |
| Neck muscle pain                                            | <input type="radio"/> | <input type="radio"/> | <input type="radio"/> | <input type="radio"/> | <input type="radio"/> | <input type="radio"/> |
| Nerve pain                                                  | <input type="radio"/> | <input type="radio"/> | <input type="radio"/> | <input type="radio"/> | <input type="radio"/> | <input type="radio"/> |
| Nerve sensations (tingling, pins and needles, numbness)     | <input type="radio"/> | <input type="radio"/> | <input type="radio"/> | <input type="radio"/> | <input type="radio"/> | <input type="radio"/> |
| Neuropathy in feet and hands (weakness, numbness, and pain) | <input type="radio"/> | <input type="radio"/> | <input type="radio"/> | <input type="radio"/> | <input type="radio"/> | <input type="radio"/> |
| New allergies                                               | <input type="radio"/> | <input type="radio"/> | <input type="radio"/> | <input type="radio"/> | <input type="radio"/> | <input type="radio"/> |
| Night sweats                                                | <input type="radio"/> | <input type="radio"/> | <input type="radio"/> | <input type="radio"/> | <input type="radio"/> | <input type="radio"/> |
| Nightmares                                                  | <input type="radio"/> | <input type="radio"/> | <input type="radio"/> | <input type="radio"/> | <input type="radio"/> | <input type="radio"/> |
| Painful scalp                                               | <input type="radio"/> | <input type="radio"/> | <input type="radio"/> | <input type="radio"/> | <input type="radio"/> | <input type="radio"/> |
| Partial or complete loss of sense of smell                  | <input type="radio"/> | <input type="radio"/> | <input type="radio"/> | <input type="radio"/> | <input type="radio"/> | <input type="radio"/> |

|                                                                                 |                       |                       |                       |                       |                       |                       |
|---------------------------------------------------------------------------------|-----------------------|-----------------------|-----------------------|-----------------------|-----------------------|-----------------------|
| Partial or complete loss of sense of taste                                      | <input type="radio"/> | <input type="radio"/> | <input type="radio"/> | <input type="radio"/> | <input type="radio"/> | <input type="radio"/> |
| Persistent chest pain or pressure                                               | <input type="radio"/> | <input type="radio"/> | <input type="radio"/> | <input type="radio"/> | <input type="radio"/> | <input type="radio"/> |
| Personality change (drastic)                                                    | <input type="radio"/> | <input type="radio"/> | <input type="radio"/> | <input type="radio"/> | <input type="radio"/> | <input type="radio"/> |
| Petechiae (pinpoint rash)                                                       | <input type="radio"/> | <input type="radio"/> | <input type="radio"/> | <input type="radio"/> | <input type="radio"/> | <input type="radio"/> |
| Phantom smells                                                                  | <input type="radio"/> | <input type="radio"/> | <input type="radio"/> | <input type="radio"/> | <input type="radio"/> | <input type="radio"/> |
| Phlegm in back of throat                                                        | <input type="radio"/> | <input type="radio"/> | <input type="radio"/> | <input type="radio"/> | <input type="radio"/> | <input type="radio"/> |
| Post-exertional malaise (worsened symptoms or flu-like symptoms after exertion) | <input type="radio"/> | <input type="radio"/> | <input type="radio"/> | <input type="radio"/> | <input type="radio"/> | <input type="radio"/> |
| Postnasal drip                                                                  | <input type="radio"/> | <input type="radio"/> | <input type="radio"/> | <input type="radio"/> | <input type="radio"/> | <input type="radio"/> |
| Rash                                                                            | <input type="radio"/> | <input type="radio"/> | <input type="radio"/> | <input type="radio"/> | <input type="radio"/> | <input type="radio"/> |
| Reflux or heartburn                                                             | <input type="radio"/> | <input type="radio"/> | <input type="radio"/> | <input type="radio"/> | <input type="radio"/> | <input type="radio"/> |
| Runny nose                                                                      | <input type="radio"/> | <input type="radio"/> | <input type="radio"/> | <input type="radio"/> | <input type="radio"/> | <input type="radio"/> |
| Sadness                                                                         | <input type="radio"/> | <input type="radio"/> | <input type="radio"/> | <input type="radio"/> | <input type="radio"/> | <input type="radio"/> |
| Seizures                                                                        | <input type="radio"/> | <input type="radio"/> | <input type="radio"/> | <input type="radio"/> | <input type="radio"/> | <input type="radio"/> |
| Sharp or sudden chest pain                                                      | <input type="radio"/> | <input type="radio"/> | <input type="radio"/> | <input type="radio"/> | <input type="radio"/> | <input type="radio"/> |
| Shortness of breath or difficulty breathing                                     | <input type="radio"/> | <input type="radio"/> | <input type="radio"/> | <input type="radio"/> | <input type="radio"/> | <input type="radio"/> |
| Shortness of breath or exhaustion from bending over                             | <input type="radio"/> | <input type="radio"/> | <input type="radio"/> | <input type="radio"/> | <input type="radio"/> | <input type="radio"/> |
| Sleeping more than normal                                                       | <input type="radio"/> | <input type="radio"/> | <input type="radio"/> | <input type="radio"/> | <input type="radio"/> | <input type="radio"/> |
| Sore throat                                                                     | <input type="radio"/> | <input type="radio"/> | <input type="radio"/> | <input type="radio"/> | <input type="radio"/> | <input type="radio"/> |
| Spinal issues                                                                   | <input type="radio"/> | <input type="radio"/> | <input type="radio"/> | <input type="radio"/> | <input type="radio"/> | <input type="radio"/> |
| Spikes in blood pressure                                                        | <input type="radio"/> | <input type="radio"/> | <input type="radio"/> | <input type="radio"/> | <input type="radio"/> | <input type="radio"/> |
| Swollen hands or feet                                                           | <input type="radio"/> | <input type="radio"/> | <input type="radio"/> | <input type="radio"/> | <input type="radio"/> | <input type="radio"/> |
| Swollen lymph nodes                                                             | <input type="radio"/> | <input type="radio"/> | <input type="radio"/> | <input type="radio"/> | <input type="radio"/> | <input type="radio"/> |
| Syncope (fainting)                                                              | <input type="radio"/> | <input type="radio"/> | <input type="radio"/> | <input type="radio"/> | <input type="radio"/> | <input type="radio"/> |
| Tachycardia (rapid heartbeat) at rest                                           | <input type="radio"/> | <input type="radio"/> | <input type="radio"/> | <input type="radio"/> | <input type="radio"/> | <input type="radio"/> |
| Tachycardia (rapid heartbeat) after standing up                                 | <input type="radio"/> | <input type="radio"/> | <input type="radio"/> | <input type="radio"/> | <input type="radio"/> | <input type="radio"/> |
| Thrush (white fungal infection in the mouth or throat)                          | <input type="radio"/> | <input type="radio"/> | <input type="radio"/> | <input type="radio"/> | <input type="radio"/> | <input type="radio"/> |
| Tinnitus or humming in ears                                                     | <input type="radio"/> | <input type="radio"/> | <input type="radio"/> | <input type="radio"/> | <input type="radio"/> | <input type="radio"/> |
| Tremors or shakiness                                                            | <input type="radio"/> | <input type="radio"/> | <input type="radio"/> | <input type="radio"/> | <input type="radio"/> | <input type="radio"/> |
| Upper back pain                                                                 | <input type="radio"/> | <input type="radio"/> | <input type="radio"/> | <input type="radio"/> | <input type="radio"/> | <input type="radio"/> |
| UTI (urinary tract infection)                                                   | <input type="radio"/> | <input type="radio"/> | <input type="radio"/> | <input type="radio"/> | <input type="radio"/> | <input type="radio"/> |
| Weakened neck                                                                   | <input type="radio"/> | <input type="radio"/> | <input type="radio"/> | <input type="radio"/> | <input type="radio"/> | <input type="radio"/> |
| Weight gain                                                                     | <input type="radio"/> | <input type="radio"/> | <input type="radio"/> | <input type="radio"/> | <input type="radio"/> | <input type="radio"/> |

The next set of questions will ask about the same symptoms. Please answer based on your experience during the past 6 weeks. If you have not experienced any of the symptoms at all, please select "Not at all" from the choices.

**During the past 6 weeks, while experiencing the symptom, how much did it bother you in terms of discomfort or pain?**

**\*If you have not experienced the symptom at all during the past 6 weeks, please select "Not at all."**

|                                                                                       | Not at all            | A little bit          | Somewhat              | Quite a bit           | Very much             |
|---------------------------------------------------------------------------------------|-----------------------|-----------------------|-----------------------|-----------------------|-----------------------|
| Abdominal pain                                                                        | <input type="radio"/> | <input type="radio"/> | <input type="radio"/> | <input type="radio"/> | <input type="radio"/> |
| Abnormally low temperature                                                            | <input type="radio"/> | <input type="radio"/> | <input type="radio"/> | <input type="radio"/> | <input type="radio"/> |
| Acid reflux                                                                           | <input type="radio"/> | <input type="radio"/> | <input type="radio"/> | <input type="radio"/> | <input type="radio"/> |
| Afternoon or evening fevers/low-grade fevers                                          | <input type="radio"/> | <input type="radio"/> | <input type="radio"/> | <input type="radio"/> | <input type="radio"/> |
| Anemia (low number of red blood cells)                                                | <input type="radio"/> | <input type="radio"/> | <input type="radio"/> | <input type="radio"/> | <input type="radio"/> |
| Anxiety                                                                               | <input type="radio"/> | <input type="radio"/> | <input type="radio"/> | <input type="radio"/> | <input type="radio"/> |
| Arrhythmia (improper beating of the heart due to electrical impulse problems)         | <input type="radio"/> | <input type="radio"/> | <input type="radio"/> | <input type="radio"/> | <input type="radio"/> |
| Bilateral neck throbbing around lymph nodes                                           | <input type="radio"/> | <input type="radio"/> | <input type="radio"/> | <input type="radio"/> | <input type="radio"/> |
| Blurry vision                                                                         | <input type="radio"/> | <input type="radio"/> | <input type="radio"/> | <input type="radio"/> | <input type="radio"/> |
| Bone aches in extremities                                                             | <input type="radio"/> | <input type="radio"/> | <input type="radio"/> | <input type="radio"/> | <input type="radio"/> |
| Brain fog                                                                             | <input type="radio"/> | <input type="radio"/> | <input type="radio"/> | <input type="radio"/> | <input type="radio"/> |
| Brain pressure                                                                        | <input type="radio"/> | <input type="radio"/> | <input type="radio"/> | <input type="radio"/> | <input type="radio"/> |
| Bulging veins                                                                         | <input type="radio"/> | <input type="radio"/> | <input type="radio"/> | <input type="radio"/> | <input type="radio"/> |
| Burning sensations                                                                    | <input type="radio"/> | <input type="radio"/> | <input type="radio"/> | <input type="radio"/> | <input type="radio"/> |
| Bruising of skin                                                                      | <input type="radio"/> | <input type="radio"/> | <input type="radio"/> | <input type="radio"/> | <input type="radio"/> |
| Calf cramps                                                                           | <input type="radio"/> | <input type="radio"/> | <input type="radio"/> | <input type="radio"/> | <input type="radio"/> |
| Change in nails (i.e. white spots, brittleness, change in moons)                      | <input type="radio"/> | <input type="radio"/> | <input type="radio"/> | <input type="radio"/> | <input type="radio"/> |
| Changes in voice                                                                      | <input type="radio"/> | <input type="radio"/> | <input type="radio"/> | <input type="radio"/> | <input type="radio"/> |
| Changed sense of taste                                                                | <input type="radio"/> | <input type="radio"/> | <input type="radio"/> | <input type="radio"/> | <input type="radio"/> |
| Chills but no fever                                                                   | <input type="radio"/> | <input type="radio"/> | <input type="radio"/> | <input type="radio"/> | <input type="radio"/> |
| Clogged ears                                                                          | <input type="radio"/> | <input type="radio"/> | <input type="radio"/> | <input type="radio"/> | <input type="radio"/> |
| Cold burning feeling in lungs                                                         | <input type="radio"/> | <input type="radio"/> | <input type="radio"/> | <input type="radio"/> | <input type="radio"/> |
| Confusion                                                                             | <input type="radio"/> | <input type="radio"/> | <input type="radio"/> | <input type="radio"/> | <input type="radio"/> |
| Congested or runny nose                                                               | <input type="radio"/> | <input type="radio"/> | <input type="radio"/> | <input type="radio"/> | <input type="radio"/> |
| Constant thirst                                                                       | <input type="radio"/> | <input type="radio"/> | <input type="radio"/> | <input type="radio"/> | <input type="radio"/> |
| Costochondritis (inflammation of the cartilage that connects a rib to the breastbone) | <input type="radio"/> | <input type="radio"/> | <input type="radio"/> | <input type="radio"/> | <input type="radio"/> |

|                                                                                             |                       |                       |                       |                       |                       |
|---------------------------------------------------------------------------------------------|-----------------------|-----------------------|-----------------------|-----------------------|-----------------------|
| Cough                                                                                       | <input type="radio"/> | <input type="radio"/> | <input type="radio"/> | <input type="radio"/> | <input type="radio"/> |
| Coughing up blood                                                                           | <input type="radio"/> | <input type="radio"/> | <input type="radio"/> | <input type="radio"/> | <input type="radio"/> |
| Covid toes (tender or itchy rash or chilblains on the toes or foot)                         | <input type="radio"/> | <input type="radio"/> | <input type="radio"/> | <input type="radio"/> | <input type="radio"/> |
| Cracked or dry lips                                                                         | <input type="radio"/> | <input type="radio"/> | <input type="radio"/> | <input type="radio"/> | <input type="radio"/> |
| Dental problems (i.e. chipped tooth, tooth loss)                                            | <input type="radio"/> | <input type="radio"/> | <input type="radio"/> | <input type="radio"/> | <input type="radio"/> |
| Diarrhea                                                                                    | <input type="radio"/> | <input type="radio"/> | <input type="radio"/> | <input type="radio"/> | <input type="radio"/> |
| Difficulty concentrating or focusing                                                        | <input type="radio"/> | <input type="radio"/> | <input type="radio"/> | <input type="radio"/> | <input type="radio"/> |
| Difficulty sleeping                                                                         | <input type="radio"/> | <input type="radio"/> | <input type="radio"/> | <input type="radio"/> | <input type="radio"/> |
| Difficulty speaking properly                                                                | <input type="radio"/> | <input type="radio"/> | <input type="radio"/> | <input type="radio"/> | <input type="radio"/> |
| Discoloration of the skin (for example: purple or blue on the hands or feet, no blistering) | <input type="radio"/> | <input type="radio"/> | <input type="radio"/> | <input type="radio"/> | <input type="radio"/> |
| Dizziness                                                                                   | <input type="radio"/> | <input type="radio"/> | <input type="radio"/> | <input type="radio"/> | <input type="radio"/> |
| Dry eyes                                                                                    | <input type="radio"/> | <input type="radio"/> | <input type="radio"/> | <input type="radio"/> | <input type="radio"/> |
| Dry or peeling skin                                                                         | <input type="radio"/> | <input type="radio"/> | <input type="radio"/> | <input type="radio"/> | <input type="radio"/> |
| Dry scalp or dandruff                                                                       | <input type="radio"/> | <input type="radio"/> | <input type="radio"/> | <input type="radio"/> | <input type="radio"/> |
| Dry throat                                                                                  | <input type="radio"/> | <input type="radio"/> | <input type="radio"/> | <input type="radio"/> | <input type="radio"/> |
| Ear pain/earache                                                                            | <input type="radio"/> | <input type="radio"/> | <input type="radio"/> | <input type="radio"/> | <input type="radio"/> |
| Elevated thyroid hormones                                                                   | <input type="radio"/> | <input type="radio"/> | <input type="radio"/> | <input type="radio"/> | <input type="radio"/> |
| Extreme pressure at base of head or occipital nerve                                         | <input type="radio"/> | <input type="radio"/> | <input type="radio"/> | <input type="radio"/> | <input type="radio"/> |
| Eye stye or infection                                                                       | <input type="radio"/> | <input type="radio"/> | <input type="radio"/> | <input type="radio"/> | <input type="radio"/> |
| Fatigue                                                                                     | <input type="radio"/> | <input type="radio"/> | <input type="radio"/> | <input type="radio"/> | <input type="radio"/> |
| Feeling irritable                                                                           | <input type="radio"/> | <input type="radio"/> | <input type="radio"/> | <input type="radio"/> | <input type="radio"/> |
| Feeling of burning skin                                                                     | <input type="radio"/> | <input type="radio"/> | <input type="radio"/> | <input type="radio"/> | <input type="radio"/> |
| Fever or chills                                                                             | <input type="radio"/> | <input type="radio"/> | <input type="radio"/> | <input type="radio"/> | <input type="radio"/> |
| Floaters or flashes of light in vision                                                      | <input type="radio"/> | <input type="radio"/> | <input type="radio"/> | <input type="radio"/> | <input type="radio"/> |
| Foot pain                                                                                   | <input type="radio"/> | <input type="radio"/> | <input type="radio"/> | <input type="radio"/> | <input type="radio"/> |
| GERD (acid reflux) with excessive salivation                                                | <input type="radio"/> | <input type="radio"/> | <input type="radio"/> | <input type="radio"/> | <input type="radio"/> |
| Goiter or lump in throat                                                                    | <input type="radio"/> | <input type="radio"/> | <input type="radio"/> | <input type="radio"/> | <input type="radio"/> |
| Hair loss                                                                                   | <input type="radio"/> | <input type="radio"/> | <input type="radio"/> | <input type="radio"/> | <input type="radio"/> |
| Hand or wrist pain                                                                          | <input type="radio"/> | <input type="radio"/> | <input type="radio"/> | <input type="radio"/> | <input type="radio"/> |
| Headache                                                                                    | <input type="radio"/> | <input type="radio"/> | <input type="radio"/> | <input type="radio"/> | <input type="radio"/> |
| Heart palpitations (heart skipping a beat or racing)                                        | <input type="radio"/> | <input type="radio"/> | <input type="radio"/> | <input type="radio"/> | <input type="radio"/> |
| Heat intolerance                                                                            | <input type="radio"/> | <input type="radio"/> | <input type="radio"/> | <input type="radio"/> | <input type="radio"/> |



|                                                             |                       |                       |                       |                       |                       |
|-------------------------------------------------------------|-----------------------|-----------------------|-----------------------|-----------------------|-----------------------|
| High blood pressure                                         | <input type="radio"/> | <input type="radio"/> | <input type="radio"/> | <input type="radio"/> | <input type="radio"/> |
| Hormone imbalances                                          | <input type="radio"/> | <input type="radio"/> | <input type="radio"/> | <input type="radio"/> | <input type="radio"/> |
| "Hot" blood rush                                            | <input type="radio"/> | <input type="radio"/> | <input type="radio"/> | <input type="radio"/> | <input type="radio"/> |
| Inability to cry                                            | <input type="radio"/> | <input type="radio"/> | <input type="radio"/> | <input type="radio"/> | <input type="radio"/> |
| Inability to exercise or be active                          | <input type="radio"/> | <input type="radio"/> | <input type="radio"/> | <input type="radio"/> | <input type="radio"/> |
| Inability to yawn                                           | <input type="radio"/> | <input type="radio"/> | <input type="radio"/> | <input type="radio"/> | <input type="radio"/> |
| Internal tremors or buzzing/vibration                       | <input type="radio"/> | <input type="radio"/> | <input type="radio"/> | <input type="radio"/> | <input type="radio"/> |
| Irregular or skipped menstrual cycles                       | <input type="radio"/> | <input type="radio"/> | <input type="radio"/> | <input type="radio"/> | <input type="radio"/> |
| Jaw pain                                                    | <input type="radio"/> | <input type="radio"/> | <input type="radio"/> | <input type="radio"/> | <input type="radio"/> |
| Joint pain                                                  | <input type="radio"/> | <input type="radio"/> | <input type="radio"/> | <input type="radio"/> | <input type="radio"/> |
| Kidney issues or protein in urine                           | <input type="radio"/> | <input type="radio"/> | <input type="radio"/> | <input type="radio"/> | <input type="radio"/> |
| Kidney pain                                                 | <input type="radio"/> | <input type="radio"/> | <input type="radio"/> | <input type="radio"/> | <input type="radio"/> |
| Low blood oxygen                                            | <input type="radio"/> | <input type="radio"/> | <input type="radio"/> | <input type="radio"/> | <input type="radio"/> |
| Low blood pressure                                          | <input type="radio"/> | <input type="radio"/> | <input type="radio"/> | <input type="radio"/> | <input type="radio"/> |
| Lower back pain                                             | <input type="radio"/> | <input type="radio"/> | <input type="radio"/> | <input type="radio"/> | <input type="radio"/> |
| Loss of appetite                                            | <input type="radio"/> | <input type="radio"/> | <input type="radio"/> | <input type="radio"/> | <input type="radio"/> |
| Loss of hearing                                             | <input type="radio"/> | <input type="radio"/> | <input type="radio"/> | <input type="radio"/> | <input type="radio"/> |
| Loss or decrease in quality of vision                       | <input type="radio"/> | <input type="radio"/> | <input type="radio"/> | <input type="radio"/> | <input type="radio"/> |
| Lump in throat/difficulty swallowing                        | <input type="radio"/> | <input type="radio"/> | <input type="radio"/> | <input type="radio"/> | <input type="radio"/> |
| Memory problems                                             | <input type="radio"/> | <input type="radio"/> | <input type="radio"/> | <input type="radio"/> | <input type="radio"/> |
| Menstrual cycles that are heavier or lighter than normal    | <input type="radio"/> | <input type="radio"/> | <input type="radio"/> | <input type="radio"/> | <input type="radio"/> |
| Mid-back pain at base of ribs                               | <input type="radio"/> | <input type="radio"/> | <input type="radio"/> | <input type="radio"/> | <input type="radio"/> |
| Mouth sores or sore tongue                                  | <input type="radio"/> | <input type="radio"/> | <input type="radio"/> | <input type="radio"/> | <input type="radio"/> |
| Muscle or body aches                                        | <input type="radio"/> | <input type="radio"/> | <input type="radio"/> | <input type="radio"/> | <input type="radio"/> |
| Muscle twitching                                            | <input type="radio"/> | <input type="radio"/> | <input type="radio"/> | <input type="radio"/> | <input type="radio"/> |
| Nausea or vomiting                                          | <input type="radio"/> | <input type="radio"/> | <input type="radio"/> | <input type="radio"/> | <input type="radio"/> |
| Neck muscle pain                                            | <input type="radio"/> | <input type="radio"/> | <input type="radio"/> | <input type="radio"/> | <input type="radio"/> |
| Nerve pain                                                  | <input type="radio"/> | <input type="radio"/> | <input type="radio"/> | <input type="radio"/> | <input type="radio"/> |
| Nerve sensations (tingling, pins and needles, numbness)     | <input type="radio"/> | <input type="radio"/> | <input type="radio"/> | <input type="radio"/> | <input type="radio"/> |
| Neuropathy in feet and hands (weakness, numbness, and pain) | <input type="radio"/> | <input type="radio"/> | <input type="radio"/> | <input type="radio"/> | <input type="radio"/> |
| New allergies                                               | <input type="radio"/> | <input type="radio"/> | <input type="radio"/> | <input type="radio"/> | <input type="radio"/> |
| Night sweats                                                | <input type="radio"/> | <input type="radio"/> | <input type="radio"/> | <input type="radio"/> | <input type="radio"/> |
| Nightmares                                                  | <input type="radio"/> | <input type="radio"/> | <input type="radio"/> | <input type="radio"/> | <input type="radio"/> |
| Painful scalp                                               | <input type="radio"/> | <input type="radio"/> | <input type="radio"/> | <input type="radio"/> | <input type="radio"/> |

|                                                                                 |                       |                       |                       |                       |                       |
|---------------------------------------------------------------------------------|-----------------------|-----------------------|-----------------------|-----------------------|-----------------------|
| Partial or complete loss of sense of smell                                      | <input type="radio"/> | <input type="radio"/> | <input type="radio"/> | <input type="radio"/> | <input type="radio"/> |
| Partial or complete loss of sense of taste                                      | <input type="radio"/> | <input type="radio"/> | <input type="radio"/> | <input type="radio"/> | <input type="radio"/> |
| Persistent chest pain or pressure                                               | <input type="radio"/> | <input type="radio"/> | <input type="radio"/> | <input type="radio"/> | <input type="radio"/> |
| Personality change (drastic)                                                    | <input type="radio"/> | <input type="radio"/> | <input type="radio"/> | <input type="radio"/> | <input type="radio"/> |
| Petechiae (pinpoint rash)                                                       | <input type="radio"/> | <input type="radio"/> | <input type="radio"/> | <input type="radio"/> | <input type="radio"/> |
| Phantom smells                                                                  | <input type="radio"/> | <input type="radio"/> | <input type="radio"/> | <input type="radio"/> | <input type="radio"/> |
| Phlegm in back of throat                                                        | <input type="radio"/> | <input type="radio"/> | <input type="radio"/> | <input type="radio"/> | <input type="radio"/> |
| Post-exertional malaise (worsened symptoms or flu-like symptoms after exertion) | <input type="radio"/> | <input type="radio"/> | <input type="radio"/> | <input type="radio"/> | <input type="radio"/> |
| Postnasal drip                                                                  | <input type="radio"/> | <input type="radio"/> | <input type="radio"/> | <input type="radio"/> | <input type="radio"/> |
| Rash                                                                            | <input type="radio"/> | <input type="radio"/> | <input type="radio"/> | <input type="radio"/> | <input type="radio"/> |
| Reflux or heartburn                                                             | <input type="radio"/> | <input type="radio"/> | <input type="radio"/> | <input type="radio"/> | <input type="radio"/> |
| Runny nose                                                                      | <input type="radio"/> | <input type="radio"/> | <input type="radio"/> | <input type="radio"/> | <input type="radio"/> |
| Sadness                                                                         | <input type="radio"/> | <input type="radio"/> | <input type="radio"/> | <input type="radio"/> | <input type="radio"/> |
| Seizures                                                                        | <input type="radio"/> | <input type="radio"/> | <input type="radio"/> | <input type="radio"/> | <input type="radio"/> |
| Sharp or sudden chest pain                                                      | <input type="radio"/> | <input type="radio"/> | <input type="radio"/> | <input type="radio"/> | <input type="radio"/> |
| Shortness of breath or difficulty breathing                                     | <input type="radio"/> | <input type="radio"/> | <input type="radio"/> | <input type="radio"/> | <input type="radio"/> |
| Shortness of breath or exhaustion from bending over                             | <input type="radio"/> | <input type="radio"/> | <input type="radio"/> | <input type="radio"/> | <input type="radio"/> |
| Sleeping more than normal                                                       | <input type="radio"/> | <input type="radio"/> | <input type="radio"/> | <input type="radio"/> | <input type="radio"/> |
| Sore throat                                                                     | <input type="radio"/> | <input type="radio"/> | <input type="radio"/> | <input type="radio"/> | <input type="radio"/> |
| Spinal issues                                                                   | <input type="radio"/> | <input type="radio"/> | <input type="radio"/> | <input type="radio"/> | <input type="radio"/> |
| Spikes in blood pressure                                                        | <input type="radio"/> | <input type="radio"/> | <input type="radio"/> | <input type="radio"/> | <input type="radio"/> |
| Swollen hands or feet                                                           | <input type="radio"/> | <input type="radio"/> | <input type="radio"/> | <input type="radio"/> | <input type="radio"/> |
| Swollen lymph nodes                                                             | <input type="radio"/> | <input type="radio"/> | <input type="radio"/> | <input type="radio"/> | <input type="radio"/> |
| Syncope (fainting)                                                              | <input type="radio"/> | <input type="radio"/> | <input type="radio"/> | <input type="radio"/> | <input type="radio"/> |
| Tachycardia (rapid heartbeat) at rest                                           | <input type="radio"/> | <input type="radio"/> | <input type="radio"/> | <input type="radio"/> | <input type="radio"/> |
| Tachycardia (rapid heartbeat) after standing up                                 | <input type="radio"/> | <input type="radio"/> | <input type="radio"/> | <input type="radio"/> | <input type="radio"/> |
| Thrush (white fungal infection in the mouth or throat)                          | <input type="radio"/> | <input type="radio"/> | <input type="radio"/> | <input type="radio"/> | <input type="radio"/> |
| Tinnitus or humming in ears                                                     | <input type="radio"/> | <input type="radio"/> | <input type="radio"/> | <input type="radio"/> | <input type="radio"/> |
| Tremors or shakiness                                                            | <input type="radio"/> | <input type="radio"/> | <input type="radio"/> | <input type="radio"/> | <input type="radio"/> |
| Upper back pain                                                                 | <input type="radio"/> | <input type="radio"/> | <input type="radio"/> | <input type="radio"/> | <input type="radio"/> |
| UTI (urinary tract infection)                                                   | <input type="radio"/> | <input type="radio"/> | <input type="radio"/> | <input type="radio"/> | <input type="radio"/> |
| Weakened neck                                                                   | <input type="radio"/> | <input type="radio"/> | <input type="radio"/> | <input type="radio"/> | <input type="radio"/> |

Weight gain



**During the past 6 weeks, ow much did the symptom impair your ability to work compared to pre-COVID?**

**\*If you have not experienced the symptom at all during the past 6 weeks, please select "Not at all."**

|                                                                                       | Not at all            | A little bit          | Somewhat              | Quite a bit           | Very much             |
|---------------------------------------------------------------------------------------|-----------------------|-----------------------|-----------------------|-----------------------|-----------------------|
| Abdominal pain                                                                        | <input type="radio"/> | <input type="radio"/> | <input type="radio"/> | <input type="radio"/> | <input type="radio"/> |
| Abnormally low temperature                                                            | <input type="radio"/> | <input type="radio"/> | <input type="radio"/> | <input type="radio"/> | <input type="radio"/> |
| Acid reflux                                                                           | <input type="radio"/> | <input type="radio"/> | <input type="radio"/> | <input type="radio"/> | <input type="radio"/> |
| Afternoon or evening fevers/low-grade fevers                                          | <input type="radio"/> | <input type="radio"/> | <input type="radio"/> | <input type="radio"/> | <input type="radio"/> |
| Anemia (low number of red blood cells)                                                | <input type="radio"/> | <input type="radio"/> | <input type="radio"/> | <input type="radio"/> | <input type="radio"/> |
| Anxiety                                                                               | <input type="radio"/> | <input type="radio"/> | <input type="radio"/> | <input type="radio"/> | <input type="radio"/> |
| Arrythmia (improper beating of the heart due to electrical impulse problems)          | <input type="radio"/> | <input type="radio"/> | <input type="radio"/> | <input type="radio"/> | <input type="radio"/> |
| Bilateral neck throbbing around lymph nodes                                           | <input type="radio"/> | <input type="radio"/> | <input type="radio"/> | <input type="radio"/> | <input type="radio"/> |
| Blurry vision                                                                         | <input type="radio"/> | <input type="radio"/> | <input type="radio"/> | <input type="radio"/> | <input type="radio"/> |
| Bone aches in extremities                                                             | <input type="radio"/> | <input type="radio"/> | <input type="radio"/> | <input type="radio"/> | <input type="radio"/> |
| Brain fog                                                                             | <input type="radio"/> | <input type="radio"/> | <input type="radio"/> | <input type="radio"/> | <input type="radio"/> |
| Brain pressure                                                                        | <input type="radio"/> | <input type="radio"/> | <input type="radio"/> | <input type="radio"/> | <input type="radio"/> |
| Bulging veins                                                                         | <input type="radio"/> | <input type="radio"/> | <input type="radio"/> | <input type="radio"/> | <input type="radio"/> |
| Burning sensations                                                                    | <input type="radio"/> | <input type="radio"/> | <input type="radio"/> | <input type="radio"/> | <input type="radio"/> |
| Bruising of skin                                                                      | <input type="radio"/> | <input type="radio"/> | <input type="radio"/> | <input type="radio"/> | <input type="radio"/> |
| Calf cramps                                                                           | <input type="radio"/> | <input type="radio"/> | <input type="radio"/> | <input type="radio"/> | <input type="radio"/> |
| Change in nails (i.e. white spots, brittleness, change in moons)                      | <input type="radio"/> | <input type="radio"/> | <input type="radio"/> | <input type="radio"/> | <input type="radio"/> |
| Changes in voice                                                                      | <input type="radio"/> | <input type="radio"/> | <input type="radio"/> | <input type="radio"/> | <input type="radio"/> |
| Changed sense of taste                                                                | <input type="radio"/> | <input type="radio"/> | <input type="radio"/> | <input type="radio"/> | <input type="radio"/> |
| Chills but no fever                                                                   | <input type="radio"/> | <input type="radio"/> | <input type="radio"/> | <input type="radio"/> | <input type="radio"/> |
| Clogged ears                                                                          | <input type="radio"/> | <input type="radio"/> | <input type="radio"/> | <input type="radio"/> | <input type="radio"/> |
| Cold burning feeling in lungs                                                         | <input type="radio"/> | <input type="radio"/> | <input type="radio"/> | <input type="radio"/> | <input type="radio"/> |
| Confusion                                                                             | <input type="radio"/> | <input type="radio"/> | <input type="radio"/> | <input type="radio"/> | <input type="radio"/> |
| Congested or runny nose                                                               | <input type="radio"/> | <input type="radio"/> | <input type="radio"/> | <input type="radio"/> | <input type="radio"/> |
| Constant thirst                                                                       | <input type="radio"/> | <input type="radio"/> | <input type="radio"/> | <input type="radio"/> | <input type="radio"/> |
| Costochondritis (inflammation of the cartilage that connects a rib to the breastbone) | <input type="radio"/> | <input type="radio"/> | <input type="radio"/> | <input type="radio"/> | <input type="radio"/> |

|                                                                                             |                       |                       |                       |                       |                       |
|---------------------------------------------------------------------------------------------|-----------------------|-----------------------|-----------------------|-----------------------|-----------------------|
| Cough                                                                                       | <input type="radio"/> | <input type="radio"/> | <input type="radio"/> | <input type="radio"/> | <input type="radio"/> |
| Coughing up blood                                                                           | <input type="radio"/> | <input type="radio"/> | <input type="radio"/> | <input type="radio"/> | <input type="radio"/> |
| Covid toes (tender or itchy rash or chilblains on the toes or foot)                         | <input type="radio"/> | <input type="radio"/> | <input type="radio"/> | <input type="radio"/> | <input type="radio"/> |
| Cracked or dry lips                                                                         | <input type="radio"/> | <input type="radio"/> | <input type="radio"/> | <input type="radio"/> | <input type="radio"/> |
| Dental problems (i.e. chipped tooth, tooth loss)                                            | <input type="radio"/> | <input type="radio"/> | <input type="radio"/> | <input type="radio"/> | <input type="radio"/> |
| Diarrhea                                                                                    | <input type="radio"/> | <input type="radio"/> | <input type="radio"/> | <input type="radio"/> | <input type="radio"/> |
| Difficulty concentrating or focusing                                                        | <input type="radio"/> | <input type="radio"/> | <input type="radio"/> | <input type="radio"/> | <input type="radio"/> |
| Difficulty sleeping                                                                         | <input type="radio"/> | <input type="radio"/> | <input type="radio"/> | <input type="radio"/> | <input type="radio"/> |
| Difficulty speaking properly                                                                | <input type="radio"/> | <input type="radio"/> | <input type="radio"/> | <input type="radio"/> | <input type="radio"/> |
| Discoloration of the skin (for example: purple or blue on the hands or feet, no blistering) | <input type="radio"/> | <input type="radio"/> | <input type="radio"/> | <input type="radio"/> | <input type="radio"/> |
| Dizziness                                                                                   | <input type="radio"/> | <input type="radio"/> | <input type="radio"/> | <input type="radio"/> | <input type="radio"/> |
| Dry eyes                                                                                    | <input type="radio"/> | <input type="radio"/> | <input type="radio"/> | <input type="radio"/> | <input type="radio"/> |
| Dry or peeling skin                                                                         | <input type="radio"/> | <input type="radio"/> | <input type="radio"/> | <input type="radio"/> | <input type="radio"/> |
| Dry scalp or dandruff                                                                       | <input type="radio"/> | <input type="radio"/> | <input type="radio"/> | <input type="radio"/> | <input type="radio"/> |
| Dry throat                                                                                  | <input type="radio"/> | <input type="radio"/> | <input type="radio"/> | <input type="radio"/> | <input type="radio"/> |
| Ear pain/earache                                                                            | <input type="radio"/> | <input type="radio"/> | <input type="radio"/> | <input type="radio"/> | <input type="radio"/> |
| Elevated thyroid hormones                                                                   | <input type="radio"/> | <input type="radio"/> | <input type="radio"/> | <input type="radio"/> | <input type="radio"/> |
| Extreme pressure at base of head or occipital nerve                                         | <input type="radio"/> | <input type="radio"/> | <input type="radio"/> | <input type="radio"/> | <input type="radio"/> |
| Eye stye or infection                                                                       | <input type="radio"/> | <input type="radio"/> | <input type="radio"/> | <input type="radio"/> | <input type="radio"/> |
| Fatigue                                                                                     | <input type="radio"/> | <input type="radio"/> | <input type="radio"/> | <input type="radio"/> | <input type="radio"/> |
| Feeling irritable                                                                           | <input type="radio"/> | <input type="radio"/> | <input type="radio"/> | <input type="radio"/> | <input type="radio"/> |
| Feeling of burning skin                                                                     | <input type="radio"/> | <input type="radio"/> | <input type="radio"/> | <input type="radio"/> | <input type="radio"/> |
| Fever or chills                                                                             | <input type="radio"/> | <input type="radio"/> | <input type="radio"/> | <input type="radio"/> | <input type="radio"/> |
| Floaters or flashes of light in vision                                                      | <input type="radio"/> | <input type="radio"/> | <input type="radio"/> | <input type="radio"/> | <input type="radio"/> |
| Foot pain                                                                                   | <input type="radio"/> | <input type="radio"/> | <input type="radio"/> | <input type="radio"/> | <input type="radio"/> |
| GERD (acid reflux) with excessive salivation                                                | <input type="radio"/> | <input type="radio"/> | <input type="radio"/> | <input type="radio"/> | <input type="radio"/> |
| Goiter or lump in throat                                                                    | <input type="radio"/> | <input type="radio"/> | <input type="radio"/> | <input type="radio"/> | <input type="radio"/> |
| Hair loss                                                                                   | <input type="radio"/> | <input type="radio"/> | <input type="radio"/> | <input type="radio"/> | <input type="radio"/> |
| Hand or wrist pain                                                                          | <input type="radio"/> | <input type="radio"/> | <input type="radio"/> | <input type="radio"/> | <input type="radio"/> |
| Headache                                                                                    | <input type="radio"/> | <input type="radio"/> | <input type="radio"/> | <input type="radio"/> | <input type="radio"/> |
| Heart palpitations (heart skipping a beat or racing)                                        | <input type="radio"/> | <input type="radio"/> | <input type="radio"/> | <input type="radio"/> | <input type="radio"/> |
| Heat intolerance                                                                            | <input type="radio"/> | <input type="radio"/> | <input type="radio"/> | <input type="radio"/> | <input type="radio"/> |

|                                                             |                       |                       |                       |                       |                       |
|-------------------------------------------------------------|-----------------------|-----------------------|-----------------------|-----------------------|-----------------------|
| High blood pressure                                         | <input type="radio"/> | <input type="radio"/> | <input type="radio"/> | <input type="radio"/> | <input type="radio"/> |
| Hormone imbalances                                          | <input type="radio"/> | <input type="radio"/> | <input type="radio"/> | <input type="radio"/> | <input type="radio"/> |
| "Hot" blood rush                                            | <input type="radio"/> | <input type="radio"/> | <input type="radio"/> | <input type="radio"/> | <input type="radio"/> |
| Inability to cry                                            | <input type="radio"/> | <input type="radio"/> | <input type="radio"/> | <input type="radio"/> | <input type="radio"/> |
| Inability to exercise or be active                          | <input type="radio"/> | <input type="radio"/> | <input type="radio"/> | <input type="radio"/> | <input type="radio"/> |
| Inability to yawn                                           | <input type="radio"/> | <input type="radio"/> | <input type="radio"/> | <input type="radio"/> | <input type="radio"/> |
| Internal tremors or buzzing/vibration                       | <input type="radio"/> | <input type="radio"/> | <input type="radio"/> | <input type="radio"/> | <input type="radio"/> |
| Irregular or skipped menstrual cycles                       | <input type="radio"/> | <input type="radio"/> | <input type="radio"/> | <input type="radio"/> | <input type="radio"/> |
| Jaw pain                                                    | <input type="radio"/> | <input type="radio"/> | <input type="radio"/> | <input type="radio"/> | <input type="radio"/> |
| Joint pain                                                  | <input type="radio"/> | <input type="radio"/> | <input type="radio"/> | <input type="radio"/> | <input type="radio"/> |
| Kidney issues or protein in urine                           | <input type="radio"/> | <input type="radio"/> | <input type="radio"/> | <input type="radio"/> | <input type="radio"/> |
| Kidney pain                                                 | <input type="radio"/> | <input type="radio"/> | <input type="radio"/> | <input type="radio"/> | <input type="radio"/> |
| Low blood oxygen                                            | <input type="radio"/> | <input type="radio"/> | <input type="radio"/> | <input type="radio"/> | <input type="radio"/> |
| Low blood pressure                                          | <input type="radio"/> | <input type="radio"/> | <input type="radio"/> | <input type="radio"/> | <input type="radio"/> |
| Lower back pain                                             | <input type="radio"/> | <input type="radio"/> | <input type="radio"/> | <input type="radio"/> | <input type="radio"/> |
| Loss of appetite                                            | <input type="radio"/> | <input type="radio"/> | <input type="radio"/> | <input type="radio"/> | <input type="radio"/> |
| Loss of hearing                                             | <input type="radio"/> | <input type="radio"/> | <input type="radio"/> | <input type="radio"/> | <input type="radio"/> |
| Loss or decrease in quality of vision                       | <input type="radio"/> | <input type="radio"/> | <input type="radio"/> | <input type="radio"/> | <input type="radio"/> |
| Lump in throat/difficulty swallowing                        | <input type="radio"/> | <input type="radio"/> | <input type="radio"/> | <input type="radio"/> | <input type="radio"/> |
| Memory problems                                             | <input type="radio"/> | <input type="radio"/> | <input type="radio"/> | <input type="radio"/> | <input type="radio"/> |
| Menstrual cycles that are heavier or lighter than normal    | <input type="radio"/> | <input type="radio"/> | <input type="radio"/> | <input type="radio"/> | <input type="radio"/> |
| Mid-back pain at base of ribs                               | <input type="radio"/> | <input type="radio"/> | <input type="radio"/> | <input type="radio"/> | <input type="radio"/> |
| Mouth sores or sore tongue                                  | <input type="radio"/> | <input type="radio"/> | <input type="radio"/> | <input type="radio"/> | <input type="radio"/> |
| Muscle or body aches                                        | <input type="radio"/> | <input type="radio"/> | <input type="radio"/> | <input type="radio"/> | <input type="radio"/> |
| Muscle twitching                                            | <input type="radio"/> | <input type="radio"/> | <input type="radio"/> | <input type="radio"/> | <input type="radio"/> |
| Nausea or vomiting                                          | <input type="radio"/> | <input type="radio"/> | <input type="radio"/> | <input type="radio"/> | <input type="radio"/> |
| Neck muscle pain                                            | <input type="radio"/> | <input type="radio"/> | <input type="radio"/> | <input type="radio"/> | <input type="radio"/> |
| Nerve pain                                                  | <input type="radio"/> | <input type="radio"/> | <input type="radio"/> | <input type="radio"/> | <input type="radio"/> |
| Nerve sensations (tingling, pins and needles, numbness)     | <input type="radio"/> | <input type="radio"/> | <input type="radio"/> | <input type="radio"/> | <input type="radio"/> |
| Neuropathy in feet and hands (weakness, numbness, and pain) | <input type="radio"/> | <input type="radio"/> | <input type="radio"/> | <input type="radio"/> | <input type="radio"/> |
| New allergies                                               | <input type="radio"/> | <input type="radio"/> | <input type="radio"/> | <input type="radio"/> | <input type="radio"/> |
| Night sweats                                                | <input type="radio"/> | <input type="radio"/> | <input type="radio"/> | <input type="radio"/> | <input type="radio"/> |
| Nightmares                                                  | <input type="radio"/> | <input type="radio"/> | <input type="radio"/> | <input type="radio"/> | <input type="radio"/> |
| Painful scalp                                               | <input type="radio"/> | <input type="radio"/> | <input type="radio"/> | <input type="radio"/> | <input type="radio"/> |

|                                                                                 |                       |                       |                       |                       |                       |
|---------------------------------------------------------------------------------|-----------------------|-----------------------|-----------------------|-----------------------|-----------------------|
| Partial or complete loss of sense of smell                                      | <input type="radio"/> | <input type="radio"/> | <input type="radio"/> | <input type="radio"/> | <input type="radio"/> |
| Partial or complete loss of sense of taste                                      | <input type="radio"/> | <input type="radio"/> | <input type="radio"/> | <input type="radio"/> | <input type="radio"/> |
| Persistent chest pain or pressure                                               | <input type="radio"/> | <input type="radio"/> | <input type="radio"/> | <input type="radio"/> | <input type="radio"/> |
| Personality change (drastic)                                                    | <input type="radio"/> | <input type="radio"/> | <input type="radio"/> | <input type="radio"/> | <input type="radio"/> |
| Petechiae (pinpoint rash)                                                       | <input type="radio"/> | <input type="radio"/> | <input type="radio"/> | <input type="radio"/> | <input type="radio"/> |
| Phantom smells                                                                  | <input type="radio"/> | <input type="radio"/> | <input type="radio"/> | <input type="radio"/> | <input type="radio"/> |
| Phlegm in back of throat                                                        | <input type="radio"/> | <input type="radio"/> | <input type="radio"/> | <input type="radio"/> | <input type="radio"/> |
| Post-exertional malaise (worsened symptoms or flu-like symptoms after exertion) | <input type="radio"/> | <input type="radio"/> | <input type="radio"/> | <input type="radio"/> | <input type="radio"/> |
| Postnasal drip                                                                  | <input type="radio"/> | <input type="radio"/> | <input type="radio"/> | <input type="radio"/> | <input type="radio"/> |
| Rash                                                                            | <input type="radio"/> | <input type="radio"/> | <input type="radio"/> | <input type="radio"/> | <input type="radio"/> |
| Reflux or heartburn                                                             | <input type="radio"/> | <input type="radio"/> | <input type="radio"/> | <input type="radio"/> | <input type="radio"/> |
| Runny nose                                                                      | <input type="radio"/> | <input type="radio"/> | <input type="radio"/> | <input type="radio"/> | <input type="radio"/> |
| Sadness                                                                         | <input type="radio"/> | <input type="radio"/> | <input type="radio"/> | <input type="radio"/> | <input type="radio"/> |
| Seizures                                                                        | <input type="radio"/> | <input type="radio"/> | <input type="radio"/> | <input type="radio"/> | <input type="radio"/> |
| Sharp or sudden chest pain                                                      | <input type="radio"/> | <input type="radio"/> | <input type="radio"/> | <input type="radio"/> | <input type="radio"/> |
| Shortness of breath or difficulty breathing                                     | <input type="radio"/> | <input type="radio"/> | <input type="radio"/> | <input type="radio"/> | <input type="radio"/> |
| Shortness of breath or exhaustion from bending over                             | <input type="radio"/> | <input type="radio"/> | <input type="radio"/> | <input type="radio"/> | <input type="radio"/> |
| Sleeping more than normal                                                       | <input type="radio"/> | <input type="radio"/> | <input type="radio"/> | <input type="radio"/> | <input type="radio"/> |
| Sore throat                                                                     | <input type="radio"/> | <input type="radio"/> | <input type="radio"/> | <input type="radio"/> | <input type="radio"/> |
| Spinal issues                                                                   | <input type="radio"/> | <input type="radio"/> | <input type="radio"/> | <input type="radio"/> | <input type="radio"/> |
| Spikes in blood pressure                                                        | <input type="radio"/> | <input type="radio"/> | <input type="radio"/> | <input type="radio"/> | <input type="radio"/> |
| Swollen hands or feet                                                           | <input type="radio"/> | <input type="radio"/> | <input type="radio"/> | <input type="radio"/> | <input type="radio"/> |
| Swollen lymph nodes                                                             | <input type="radio"/> | <input type="radio"/> | <input type="radio"/> | <input type="radio"/> | <input type="radio"/> |
| Syncope (fainting)                                                              | <input type="radio"/> | <input type="radio"/> | <input type="radio"/> | <input type="radio"/> | <input type="radio"/> |
| Tachycardia (rapid heartbeat) at rest                                           | <input type="radio"/> | <input type="radio"/> | <input type="radio"/> | <input type="radio"/> | <input type="radio"/> |
| Tachycardia (rapid heartbeat) after standing up                                 | <input type="radio"/> | <input type="radio"/> | <input type="radio"/> | <input type="radio"/> | <input type="radio"/> |
| Thrush (white fungal infection in the mouth or throat)                          | <input type="radio"/> | <input type="radio"/> | <input type="radio"/> | <input type="radio"/> | <input type="radio"/> |
| Tinnitus or humming in ears                                                     | <input type="radio"/> | <input type="radio"/> | <input type="radio"/> | <input type="radio"/> | <input type="radio"/> |
| Tremors or shakiness                                                            | <input type="radio"/> | <input type="radio"/> | <input type="radio"/> | <input type="radio"/> | <input type="radio"/> |
| Upper back pain                                                                 | <input type="radio"/> | <input type="radio"/> | <input type="radio"/> | <input type="radio"/> | <input type="radio"/> |
| UTI (urinary tract infection)                                                   | <input type="radio"/> | <input type="radio"/> | <input type="radio"/> | <input type="radio"/> | <input type="radio"/> |
| Weakened neck                                                                   | <input type="radio"/> | <input type="radio"/> | <input type="radio"/> | <input type="radio"/> | <input type="radio"/> |

Weight gain





**During the past 6 weeks, how much did the symptom impair your social or family functioning compared to pre-COVID?**

**\*If you have not experienced the symptom at all during the past 6 weeks, please select "Not at all."**

|                                                                                       | Not at all            | A little bit          | Somewhat              | Quite a bit           | Very much             |
|---------------------------------------------------------------------------------------|-----------------------|-----------------------|-----------------------|-----------------------|-----------------------|
| Abdominal pain                                                                        | <input type="radio"/> | <input type="radio"/> | <input type="radio"/> | <input type="radio"/> | <input type="radio"/> |
| Abnormally low temperature                                                            | <input type="radio"/> | <input type="radio"/> | <input type="radio"/> | <input type="radio"/> | <input type="radio"/> |
| Acid reflux                                                                           | <input type="radio"/> | <input type="radio"/> | <input type="radio"/> | <input type="radio"/> | <input type="radio"/> |
| Afternoon or evening fevers/low-grade fevers                                          | <input type="radio"/> | <input type="radio"/> | <input type="radio"/> | <input type="radio"/> | <input type="radio"/> |
| Anemia (low number of red blood cells)                                                | <input type="radio"/> | <input type="radio"/> | <input type="radio"/> | <input type="radio"/> | <input type="radio"/> |
| Anxiety                                                                               | <input type="radio"/> | <input type="radio"/> | <input type="radio"/> | <input type="radio"/> | <input type="radio"/> |
| Arrhythmia (improper beating of the heart due to electrical impulse problems)         | <input type="radio"/> | <input type="radio"/> | <input type="radio"/> | <input type="radio"/> | <input type="radio"/> |
| Bilateral neck throbbing around lymph nodes                                           | <input type="radio"/> | <input type="radio"/> | <input type="radio"/> | <input type="radio"/> | <input type="radio"/> |
| Blurry vision                                                                         | <input type="radio"/> | <input type="radio"/> | <input type="radio"/> | <input type="radio"/> | <input type="radio"/> |
| Bone aches in extremities                                                             | <input type="radio"/> | <input type="radio"/> | <input type="radio"/> | <input type="radio"/> | <input type="radio"/> |
| Brain fog                                                                             | <input type="radio"/> | <input type="radio"/> | <input type="radio"/> | <input type="radio"/> | <input type="radio"/> |
| Brain pressure                                                                        | <input type="radio"/> | <input type="radio"/> | <input type="radio"/> | <input type="radio"/> | <input type="radio"/> |
| Bulging veins                                                                         | <input type="radio"/> | <input type="radio"/> | <input type="radio"/> | <input type="radio"/> | <input type="radio"/> |
| Burning sensations                                                                    | <input type="radio"/> | <input type="radio"/> | <input type="radio"/> | <input type="radio"/> | <input type="radio"/> |
| Bruising of skin                                                                      | <input type="radio"/> | <input type="radio"/> | <input type="radio"/> | <input type="radio"/> | <input type="radio"/> |
| Calf cramps                                                                           | <input type="radio"/> | <input type="radio"/> | <input type="radio"/> | <input type="radio"/> | <input type="radio"/> |
| Change in nails (i.e. white spots, brittleness, change in moons)                      | <input type="radio"/> | <input type="radio"/> | <input type="radio"/> | <input type="radio"/> | <input type="radio"/> |
| Changes in voice                                                                      | <input type="radio"/> | <input type="radio"/> | <input type="radio"/> | <input type="radio"/> | <input type="radio"/> |
| Changed sense of taste                                                                | <input type="radio"/> | <input type="radio"/> | <input type="radio"/> | <input type="radio"/> | <input type="radio"/> |
| Chills but no fever                                                                   | <input type="radio"/> | <input type="radio"/> | <input type="radio"/> | <input type="radio"/> | <input type="radio"/> |
| Clogged ears                                                                          | <input type="radio"/> | <input type="radio"/> | <input type="radio"/> | <input type="radio"/> | <input type="radio"/> |
| Cold burning feeling in lungs                                                         | <input type="radio"/> | <input type="radio"/> | <input type="radio"/> | <input type="radio"/> | <input type="radio"/> |
| Confusion                                                                             | <input type="radio"/> | <input type="radio"/> | <input type="radio"/> | <input type="radio"/> | <input type="radio"/> |
| Congested or runny nose                                                               | <input type="radio"/> | <input type="radio"/> | <input type="radio"/> | <input type="radio"/> | <input type="radio"/> |
| Constant thirst                                                                       | <input type="radio"/> | <input type="radio"/> | <input type="radio"/> | <input type="radio"/> | <input type="radio"/> |
| Costochondritis (inflammation of the cartilage that connects a rib to the breastbone) | <input type="radio"/> | <input type="radio"/> | <input type="radio"/> | <input type="radio"/> | <input type="radio"/> |

|                                                                                             |                       |                       |                       |                       |                       |
|---------------------------------------------------------------------------------------------|-----------------------|-----------------------|-----------------------|-----------------------|-----------------------|
| Cough                                                                                       | <input type="radio"/> | <input type="radio"/> | <input type="radio"/> | <input type="radio"/> | <input type="radio"/> |
| Coughing up blood                                                                           | <input type="radio"/> | <input type="radio"/> | <input type="radio"/> | <input type="radio"/> | <input type="radio"/> |
| Covid toes (tender or itchy rash or chilblains on the toes or foot)                         | <input type="radio"/> | <input type="radio"/> | <input type="radio"/> | <input type="radio"/> | <input type="radio"/> |
| Cracked or dry lips                                                                         | <input type="radio"/> | <input type="radio"/> | <input type="radio"/> | <input type="radio"/> | <input type="radio"/> |
| Dental problems (i.e. chipped tooth, tooth loss)                                            | <input type="radio"/> | <input type="radio"/> | <input type="radio"/> | <input type="radio"/> | <input type="radio"/> |
| Diarrhea                                                                                    | <input type="radio"/> | <input type="radio"/> | <input type="radio"/> | <input type="radio"/> | <input type="radio"/> |
| Difficulty concentrating or focusing                                                        | <input type="radio"/> | <input type="radio"/> | <input type="radio"/> | <input type="radio"/> | <input type="radio"/> |
| Difficulty sleeping                                                                         | <input type="radio"/> | <input type="radio"/> | <input type="radio"/> | <input type="radio"/> | <input type="radio"/> |
| Difficulty speaking properly                                                                | <input type="radio"/> | <input type="radio"/> | <input type="radio"/> | <input type="radio"/> | <input type="radio"/> |
| Discoloration of the skin (for example: purple or blue on the hands or feet, no blistering) | <input type="radio"/> | <input type="radio"/> | <input type="radio"/> | <input type="radio"/> | <input type="radio"/> |
| Dizziness                                                                                   | <input type="radio"/> | <input type="radio"/> | <input type="radio"/> | <input type="radio"/> | <input type="radio"/> |
| Dry eyes                                                                                    | <input type="radio"/> | <input type="radio"/> | <input type="radio"/> | <input type="radio"/> | <input type="radio"/> |
| Dry or peeling skin                                                                         | <input type="radio"/> | <input type="radio"/> | <input type="radio"/> | <input type="radio"/> | <input type="radio"/> |
| Dry scalp or dandruff                                                                       | <input type="radio"/> | <input type="radio"/> | <input type="radio"/> | <input type="radio"/> | <input type="radio"/> |
| Dry throat                                                                                  | <input type="radio"/> | <input type="radio"/> | <input type="radio"/> | <input type="radio"/> | <input type="radio"/> |
| Ear pain/earache                                                                            | <input type="radio"/> | <input type="radio"/> | <input type="radio"/> | <input type="radio"/> | <input type="radio"/> |
| Elevated thyroid hormones                                                                   | <input type="radio"/> | <input type="radio"/> | <input type="radio"/> | <input type="radio"/> | <input type="radio"/> |
| Extreme pressure at base of head or occipital nerve                                         | <input type="radio"/> | <input type="radio"/> | <input type="radio"/> | <input type="radio"/> | <input type="radio"/> |
| Eye stye or infection                                                                       | <input type="radio"/> | <input type="radio"/> | <input type="radio"/> | <input type="radio"/> | <input type="radio"/> |
| Fatigue                                                                                     | <input type="radio"/> | <input type="radio"/> | <input type="radio"/> | <input type="radio"/> | <input type="radio"/> |
| Feeling irritable                                                                           | <input type="radio"/> | <input type="radio"/> | <input type="radio"/> | <input type="radio"/> | <input type="radio"/> |
| Feeling of burning skin                                                                     | <input type="radio"/> | <input type="radio"/> | <input type="radio"/> | <input type="radio"/> | <input type="radio"/> |
| Fever or chills                                                                             | <input type="radio"/> | <input type="radio"/> | <input type="radio"/> | <input type="radio"/> | <input type="radio"/> |
| Floaters or flashes of light in vision                                                      | <input type="radio"/> | <input type="radio"/> | <input type="radio"/> | <input type="radio"/> | <input type="radio"/> |
| Foot pain                                                                                   | <input type="radio"/> | <input type="radio"/> | <input type="radio"/> | <input type="radio"/> | <input type="radio"/> |
| GERD (acid reflux) with excessive salivation                                                | <input type="radio"/> | <input type="radio"/> | <input type="radio"/> | <input type="radio"/> | <input type="radio"/> |
| Goiter or lump in throat                                                                    | <input type="radio"/> | <input type="radio"/> | <input type="radio"/> | <input type="radio"/> | <input type="radio"/> |
| Hair loss                                                                                   | <input type="radio"/> | <input type="radio"/> | <input type="radio"/> | <input type="radio"/> | <input type="radio"/> |
| Hand or wrist pain                                                                          | <input type="radio"/> | <input type="radio"/> | <input type="radio"/> | <input type="radio"/> | <input type="radio"/> |
| Headache                                                                                    | <input type="radio"/> | <input type="radio"/> | <input type="radio"/> | <input type="radio"/> | <input type="radio"/> |
| Heart palpitations (heart skipping a beat or racing)                                        | <input type="radio"/> | <input type="radio"/> | <input type="radio"/> | <input type="radio"/> | <input type="radio"/> |
| Heat intolerance                                                                            | <input type="radio"/> | <input type="radio"/> | <input type="radio"/> | <input type="radio"/> | <input type="radio"/> |

|                                                             |                       |                       |                       |                       |                       |
|-------------------------------------------------------------|-----------------------|-----------------------|-----------------------|-----------------------|-----------------------|
| High blood pressure                                         | <input type="radio"/> | <input type="radio"/> | <input type="radio"/> | <input type="radio"/> | <input type="radio"/> |
| Hormone imbalances                                          | <input type="radio"/> | <input type="radio"/> | <input type="radio"/> | <input type="radio"/> | <input type="radio"/> |
| "Hot" blood rush                                            | <input type="radio"/> | <input type="radio"/> | <input type="radio"/> | <input type="radio"/> | <input type="radio"/> |
| Inability to cry                                            | <input type="radio"/> | <input type="radio"/> | <input type="radio"/> | <input type="radio"/> | <input type="radio"/> |
| Inability to exercise or be active                          | <input type="radio"/> | <input type="radio"/> | <input type="radio"/> | <input type="radio"/> | <input type="radio"/> |
| Inability to yawn                                           | <input type="radio"/> | <input type="radio"/> | <input type="radio"/> | <input type="radio"/> | <input type="radio"/> |
| Internal tremors or buzzing/vibration                       | <input type="radio"/> | <input type="radio"/> | <input type="radio"/> | <input type="radio"/> | <input type="radio"/> |
| Irregular or skipped menstrual cycles                       | <input type="radio"/> | <input type="radio"/> | <input type="radio"/> | <input type="radio"/> | <input type="radio"/> |
| Jaw pain                                                    | <input type="radio"/> | <input type="radio"/> | <input type="radio"/> | <input type="radio"/> | <input type="radio"/> |
| Joint pain                                                  | <input type="radio"/> | <input type="radio"/> | <input type="radio"/> | <input type="radio"/> | <input type="radio"/> |
| Kidney issues or protein in urine                           | <input type="radio"/> | <input type="radio"/> | <input type="radio"/> | <input type="radio"/> | <input type="radio"/> |
| Kidney pain                                                 | <input type="radio"/> | <input type="radio"/> | <input type="radio"/> | <input type="radio"/> | <input type="radio"/> |
| Low blood oxygen                                            | <input type="radio"/> | <input type="radio"/> | <input type="radio"/> | <input type="radio"/> | <input type="radio"/> |
| Low blood pressure                                          | <input type="radio"/> | <input type="radio"/> | <input type="radio"/> | <input type="radio"/> | <input type="radio"/> |
| Lower back pain                                             | <input type="radio"/> | <input type="radio"/> | <input type="radio"/> | <input type="radio"/> | <input type="radio"/> |
| Loss of appetite                                            | <input type="radio"/> | <input type="radio"/> | <input type="radio"/> | <input type="radio"/> | <input type="radio"/> |
| Loss of hearing                                             | <input type="radio"/> | <input type="radio"/> | <input type="radio"/> | <input type="radio"/> | <input type="radio"/> |
| Loss or decrease in quality of vision                       | <input type="radio"/> | <input type="radio"/> | <input type="radio"/> | <input type="radio"/> | <input type="radio"/> |
| Lump in throat/difficulty swallowing                        | <input type="radio"/> | <input type="radio"/> | <input type="radio"/> | <input type="radio"/> | <input type="radio"/> |
| Memory problems                                             | <input type="radio"/> | <input type="radio"/> | <input type="radio"/> | <input type="radio"/> | <input type="radio"/> |
| Menstrual cycles that are heavier or lighter than normal    | <input type="radio"/> | <input type="radio"/> | <input type="radio"/> | <input type="radio"/> | <input type="radio"/> |
| Mid-back pain at base of ribs                               | <input type="radio"/> | <input type="radio"/> | <input type="radio"/> | <input type="radio"/> | <input type="radio"/> |
| Mouth sores or sore tongue                                  | <input type="radio"/> | <input type="radio"/> | <input type="radio"/> | <input type="radio"/> | <input type="radio"/> |
| Muscle or body aches                                        | <input type="radio"/> | <input type="radio"/> | <input type="radio"/> | <input type="radio"/> | <input type="radio"/> |
| Muscle twitching                                            | <input type="radio"/> | <input type="radio"/> | <input type="radio"/> | <input type="radio"/> | <input type="radio"/> |
| Nausea or vomiting                                          | <input type="radio"/> | <input type="radio"/> | <input type="radio"/> | <input type="radio"/> | <input type="radio"/> |
| Neck muscle pain                                            | <input type="radio"/> | <input type="radio"/> | <input type="radio"/> | <input type="radio"/> | <input type="radio"/> |
| Nerve pain                                                  | <input type="radio"/> | <input type="radio"/> | <input type="radio"/> | <input type="radio"/> | <input type="radio"/> |
| Nerve sensations (tingling, pins and needles, numbness)     | <input type="radio"/> | <input type="radio"/> | <input type="radio"/> | <input type="radio"/> | <input type="radio"/> |
| Neuropathy in feet and hands (weakness, numbness, and pain) | <input type="radio"/> | <input type="radio"/> | <input type="radio"/> | <input type="radio"/> | <input type="radio"/> |
| New allergies                                               | <input type="radio"/> | <input type="radio"/> | <input type="radio"/> | <input type="radio"/> | <input type="radio"/> |
| Night sweats                                                | <input type="radio"/> | <input type="radio"/> | <input type="radio"/> | <input type="radio"/> | <input type="radio"/> |
| Nightmares                                                  | <input type="radio"/> | <input type="radio"/> | <input type="radio"/> | <input type="radio"/> | <input type="radio"/> |
| Painful scalp                                               | <input type="radio"/> | <input type="radio"/> | <input type="radio"/> | <input type="radio"/> | <input type="radio"/> |

|                                                                                 |                       |                       |                       |                       |                       |
|---------------------------------------------------------------------------------|-----------------------|-----------------------|-----------------------|-----------------------|-----------------------|
| Partial or complete loss of sense of smell                                      | <input type="radio"/> | <input type="radio"/> | <input type="radio"/> | <input type="radio"/> | <input type="radio"/> |
| Partial or complete loss of sense of taste                                      | <input type="radio"/> | <input type="radio"/> | <input type="radio"/> | <input type="radio"/> | <input type="radio"/> |
| Persistent chest pain or pressure                                               | <input type="radio"/> | <input type="radio"/> | <input type="radio"/> | <input type="radio"/> | <input type="radio"/> |
| Personality change (drastic)                                                    | <input type="radio"/> | <input type="radio"/> | <input type="radio"/> | <input type="radio"/> | <input type="radio"/> |
| Petechiae (pinpoint rash)                                                       | <input type="radio"/> | <input type="radio"/> | <input type="radio"/> | <input type="radio"/> | <input type="radio"/> |
| Phantom smells                                                                  | <input type="radio"/> | <input type="radio"/> | <input type="radio"/> | <input type="radio"/> | <input type="radio"/> |
| Phlegm in back of throat                                                        | <input type="radio"/> | <input type="radio"/> | <input type="radio"/> | <input type="radio"/> | <input type="radio"/> |
| Post-exertional malaise (worsened symptoms or flu-like symptoms after exertion) | <input type="radio"/> | <input type="radio"/> | <input type="radio"/> | <input type="radio"/> | <input type="radio"/> |
| Postnasal drip                                                                  | <input type="radio"/> | <input type="radio"/> | <input type="radio"/> | <input type="radio"/> | <input type="radio"/> |
| Rash                                                                            | <input type="radio"/> | <input type="radio"/> | <input type="radio"/> | <input type="radio"/> | <input type="radio"/> |
| Reflux or heartburn                                                             | <input type="radio"/> | <input type="radio"/> | <input type="radio"/> | <input type="radio"/> | <input type="radio"/> |
| Runny nose                                                                      | <input type="radio"/> | <input type="radio"/> | <input type="radio"/> | <input type="radio"/> | <input type="radio"/> |
| Sadness                                                                         | <input type="radio"/> | <input type="radio"/> | <input type="radio"/> | <input type="radio"/> | <input type="radio"/> |
| Seizures                                                                        | <input type="radio"/> | <input type="radio"/> | <input type="radio"/> | <input type="radio"/> | <input type="radio"/> |
| Sharp or sudden chest pain                                                      | <input type="radio"/> | <input type="radio"/> | <input type="radio"/> | <input type="radio"/> | <input type="radio"/> |
| Shortness of breath or difficulty breathing                                     | <input type="radio"/> | <input type="radio"/> | <input type="radio"/> | <input type="radio"/> | <input type="radio"/> |
| Shortness of breath or exhaustion from bending over                             | <input type="radio"/> | <input type="radio"/> | <input type="radio"/> | <input type="radio"/> | <input type="radio"/> |
| Sleeping more than normal                                                       | <input type="radio"/> | <input type="radio"/> | <input type="radio"/> | <input type="radio"/> | <input type="radio"/> |
| Sore throat                                                                     | <input type="radio"/> | <input type="radio"/> | <input type="radio"/> | <input type="radio"/> | <input type="radio"/> |
| Spinal issues                                                                   | <input type="radio"/> | <input type="radio"/> | <input type="radio"/> | <input type="radio"/> | <input type="radio"/> |
| Spikes in blood pressure                                                        | <input type="radio"/> | <input type="radio"/> | <input type="radio"/> | <input type="radio"/> | <input type="radio"/> |
| Swollen hands or feet                                                           | <input type="radio"/> | <input type="radio"/> | <input type="radio"/> | <input type="radio"/> | <input type="radio"/> |
| Swollen lymph nodes                                                             | <input type="radio"/> | <input type="radio"/> | <input type="radio"/> | <input type="radio"/> | <input type="radio"/> |
| Syncope (fainting)                                                              | <input type="radio"/> | <input type="radio"/> | <input type="radio"/> | <input type="radio"/> | <input type="radio"/> |
| Tachycardia (rapid heartbeat) at rest                                           | <input type="radio"/> | <input type="radio"/> | <input type="radio"/> | <input type="radio"/> | <input type="radio"/> |
| Tachycardia (rapid heartbeat) after standing up                                 | <input type="radio"/> | <input type="radio"/> | <input type="radio"/> | <input type="radio"/> | <input type="radio"/> |
| Thrush (white fungal infection in the mouth or throat)                          | <input type="radio"/> | <input type="radio"/> | <input type="radio"/> | <input type="radio"/> | <input type="radio"/> |
| Tinnitus or humming in ears                                                     | <input type="radio"/> | <input type="radio"/> | <input type="radio"/> | <input type="radio"/> | <input type="radio"/> |
| Tremors or shakiness                                                            | <input type="radio"/> | <input type="radio"/> | <input type="radio"/> | <input type="radio"/> | <input type="radio"/> |
| Upper back pain                                                                 | <input type="radio"/> | <input type="radio"/> | <input type="radio"/> | <input type="radio"/> | <input type="radio"/> |
| UTI (urinary tract infection)                                                   | <input type="radio"/> | <input type="radio"/> | <input type="radio"/> | <input type="radio"/> | <input type="radio"/> |
| Weakened neck                                                                   | <input type="radio"/> | <input type="radio"/> | <input type="radio"/> | <input type="radio"/> | <input type="radio"/> |

Weight gain

---

Are there any symptoms not listed above that you have experienced within the past 6 weeks?

\*Please list all if so

---

**During the past 6 weeks**

|                                                  | 76-100% of health<br>before COVID-19 | 51-75% of health<br>before COVID-19 | 26-50% of health<br>before COVID-19 | 0-25% of health<br>before COVID-19 |
|--------------------------------------------------|--------------------------------------|-------------------------------------|-------------------------------------|------------------------------------|
| On your best day, would you say that you are at  | <input type="radio"/>                | <input type="radio"/>               | <input type="radio"/>               | <input type="radio"/>              |
| On your worst day, would you say that you are at | <input type="radio"/>                | <input type="radio"/>               | <input type="radio"/>               | <input type="radio"/>              |

Compared to your health before you received the first dose of your vaccine on [vaccine\_arm\_1][v\_v\_vax\_date], would you say that your health is currently

- Better  
 Worse  
 The same  
 Don't know

Please, in the space below, share any information about your experience with COVID-19 or the vaccine that we might have missed.

---

# Ineligible

Please complete the survey below for all ineligible participants.

Find ineligible participants by going to:

Alerts & Notifications  
Click on Alert #7 (Ineligible)  
Click on "view list" in "Activity" (below the alert)  
Select any ineligible participants who haven't yet been marked as ineligible.  
Thank you!

---

2846 Please check if this participant is ineligible

This participant is ineligible

# Lost to Follow-Up

Please complete the survey below for all participants who were lost to follow-up.

Participants are lost to follow-up if they:

Don't complete phone consultation after 3 attempts. Don't get vaccinated within 5 weeks of completing Study Visit 1 (unless they have extenuating medical circumstances). Are more than 1 week late for a study visit. (i.e. do not complete study visit 2 within 8 weeks after the first dose of the vaccine. The time period for study visit 2 should be 5-7 weeks after the vaccine.) Thank you!

---

2847 Please check if this participant is lost to follow-up

This participant has been lost to follow-up



# Off Study (Complete)

Please complete the survey below as soon as a participant has completed his or her last study visit.

Thank you!

---

2848 Please check if this participant has completed the study.

This participant has completed the study
